# Supplementary material for: The wet deposition of the inorganic ions in the 320 cities across China: spatiotemporal variation, source apportionment, and dominant factors
Source: Copernicus journal article supplement (doi:10.5194/acp-2019-52), 2019-04-10

## ***Supplementary Information***

**Title:** The wet deposition of the inorganic ions in the 320 cities across China: spatiotemporal variation, source apportionment, and dominant factors

**Authors:** Rui Li<sup>a</sup>, Lulu Cui<sup>a</sup>, Yilong Zhao<sup>a</sup>, Ziyu Zhang<sup>a</sup>, Tianming Sun<sup>a</sup>, Junlin Li<sup>a</sup>, Wenhui Zhou<sup>a</sup>, Ya Meng<sup>a</sup>, Hongbo Fu<sup>a,b,c \*</sup>

**Affiliation:** <sup>a</sup> *Shanghai Key Laboratory of Atmospheric Particle Pollution and Prevention, Department of Environmental Science & Engineering, Fudan University, Shanghai 200433, China*

<sup>b</sup> *Collaborative Innovation Center of Atmospheric Environment and Equipment Technology (CICAET), Nanjing University of Information Science and Technology, Nanjing 210044, China*

<sup>c</sup> *Collaborative Innovation Center of Atmospheric Environment and Equipment Technology (CICAET), Nanjing University of Information Science and Technology, Nanjing 210044, P.R.*

*China*

### **Contents of the file**

Number of Pages: 177

Number of figures: 166

Number of tables: 2

**Tab. S1** All of the 320 observation cities, provinces, and five ecological regions including Northeast China (NEC), North China (NC), Southeast China (SEC), Southwest China (SWC), and Northwest China (NWC).

| City       | Province/Autonomous<br>Region/Municipality | Region |
|------------|--------------------------------------------|--------|
| Aba        | Sichuan                                    | SWC    |
| Arksu      | Xinjiang                                   | NWC    |
| Alxa       | Inner Mongolia                             | NC     |
| Altay      | Xinjiang                                   | NWC    |
| Ankang     | Shaanxi                                    | NWC    |
| Anqing     | Anhui                                      | SEC    |
| Anshun     | Guizhou                                    | SWC    |
| Anyang     | Henan                                      | NC     |
| Anshan     | Liaoning                                   | NEC    |
| Bayannur   | Inner Mongolia                             | NC     |
| Bayingolin | Xinjiang                                   | NWC    |
| Bazhong    | Sichuan                                    | SWC    |
| Baicheng   | Jilin                                      | NEC    |
| Baishan    | Jilin                                      | NEC    |
| Baiyin     | Gansu                                      | NWC    |
| Baise      | Guangxi                                    | SWC    |
| Bengbu     | Anhui                                      | SEC    |
| Baotou     | Inner Mongolia                             | NC     |
| Baoji      | Shaanxi                                    | NWC    |
| Baoding    | Hebei                                      | NC     |
| Baoshan    | Yunnan                                     | SWC    |
| Beihai     | Guangxi                                    | SWC    |
| Beijing    | Beijing                                    | NC     |
| Benxi      | Liaoning                                   | NEC    |
| Bijie      | Guizhou                                    | SWC    |
| Binzhou    | Shandong                                   | NC     |
| Bozhou     | Anhui                                      | SEC    |
| Cangzhou   | Hebei                                      | NC     |
| Changji    | Xinjiang                                   | NWC    |
| Changde    | Hunan                                      | SEC    |
| Changzhou  | Jiangsu                                    | SEC    |
| Chaoyang   | Liaoning                                   | NEC    |
| Chaozhou   | Guangdong                                  | SEC    |
| Chengzhou  | Hunan                                      | SEC    |
| Chengdu    | Sichuan                                    | SWC    |
| Chengde    | Hebei                                      | NC     |
| Chizhou    | Anhui                                      | SEC    |
| Chifeng    | Inner Mongolia                             | NC     |
| Chongzuo   | Guangxi                                    | SWC    |

---

|               |                |     |
|---------------|----------------|-----|
| Chuzhou       | Anhui          | SEC |
| Chuxiong      | Yunnan         | SWC |
| Dazhou        | Sichuan        | SWC |
| Dali          | Yunnan         | SWC |
| Dalian        | Liaoning       | NEC |
| Daqing        | Heilongjiang   | NEC |
| Datong        | Shanxi         | NC  |
| Dandong       | Liaoning       | NEC |
| Dehong        | Yunnan         | SWC |
| Deyang        | Sichuan        | SWC |
| Dezhou        | Shandong       | NC  |
| Diqing        | Yunnan         | SWC |
| Dingxi        | Gansu          | NWC |
| Dongguan      | Guangdong      | SEC |
| Dongying      | Shandong       | NC  |
| Erdos         | Inner Mongolia | NC  |
| Ezhou         | Hubei          | SEC |
| Enshi         | Hubei          | SEC |
| Fangchenggang | Guangxi        | SWC |
| Foshan        | Guangdong      | SEC |
| Fuzhou        | Fujian         | SEC |
| Fushun        | Liaoning       | NEC |
| Fuzhou        | Jiangxi        | SEC |
| Fuxin         | Liaoning       | NEC |
| Fuyang        | Anhui          | SEC |
| Gannan        | Gansu          | NWC |
| Ganzi         | Sichuan        | SWC |
| Ganzhou       | Jiangxi        | SEC |
| Guyuan        | Ningxia        | NWC |
| Guangan       | Sichuan        | SWC |
| Guangyuan     | Sichuan        | SWC |
| Guangzhou     | Guangdong      | SEC |
| Guigang       | Guangxi        | SWC |
| Guiyang       | Guizhou        | SWC |
| Guilin        | Guangxi        | SWC |
| Harbin        | Heilongjiang   | NEC |
| Hami          | Xinjiang       | NWC |
| Haibei        | Qinghai        | NWC |
| Haikou        | Hainan         | SEC |
| Hainan        | Qinghai        | NWC |
| Haixi         | Qinghai        | NWC |
| Handan        | Hebei          | NC  |
| Hanzhong      | Shaanxi        | NWC |
| Hangzhou      | Zhejiang       | SEC |

---

---

|            |                |     |
|------------|----------------|-----|
| Hefei      | Anhui          | SEC |
| Hetian     | Xinjiang       | NWC |
| Hechi      | Guangxi        | SWC |
| Heyuan     | Guangdong      | SEC |
| Heze       | Shandong       | NC  |
| Hezhou     | Guangxi        | SWC |
| Hebi       | Henan          | NC  |
| Hegang     | Heilongjiang   | NEC |
| Heishui    | Heilongjiang   | NEC |
| Hengshui   | Hebei          | NC  |
| Hengyang   | Hunan          | SEC |
| Honghe     | Yunnan         | SWC |
| Hohehot    | Inner Mongolia | NC  |
| Hulun Buir | Inner Mongolia | NC  |
| Huludao    | Liaoning       | NEC |
| Huzhou     | Zhejiang       | SEC |
| Huaihua    | Hunan          | SEC |
| Huaian     | Jiangsu        | SEC |
| Huaibei    | Anhui          | SEC |
| Huainan    | Anhui          | SEC |
| Huanggang  | Hubei          | SEC |
| Huangnan   | Qinghai        | NWC |
| Huangshan  | Anhui          | SEC |
| Huangshi   | Hubei          | SEC |
| Huizhou    | Anhui          | SEC |
| Jixi       | Heilongjiang   | NEC |
| Ji'an      | Jiangxi        | SEC |
| Jilin      | Jilin          | NEC |
| Jinan      | Shandong       | NC  |
| Jining     | Shandong       | NC  |
| Jiamusi    | Heilongjiang   | NEC |
| Jiaxing    | Zhejiang       | SEC |
| Jiayuguan  | Gansu          | NWC |
| Jiangmen   | Guangdong      | SEC |
| Jiaozuo    | Henan          | NC  |
| Jieyang    | Guangdong      | SEC |
| Jinchang   | Gansu          | NWC |
| Jinhua     | Zhejiang       | SEC |
| Jinzhou    | Liaoning       | NEC |
| Jincheng   | Shanxi         | NC  |
| Jinzhong   | Shanxi         | NC  |
| Jingmen    | Hubei          | SEC |
| Jingzhou   | Hubei          | SEC |
| Jingdezhen | Jiangxi        | SEC |

---

---

|             |              |     |
|-------------|--------------|-----|
| Jiujiang    | Jiangxi      | SEC |
| Jiuquan     | Gansu        | NWC |
| Kaifeng     | Henan        | NC  |
| Karamay     | Xinjiang     | NWC |
| Suerkezi    | Xinjiang     | NWC |
| Kunming     | Yunnan       | SWC |
| Lhasa       | Tibet        | SWC |
| Laibin      | Guangxi      | SWC |
| Laiwu       | Shandong     | NC  |
| Lanzhou     | Gansu        | NWC |
| Langfang    | Hebei        | NC  |
| Leshan      | Sichuan      | SWC |
| Lijiang     | Yunnan       | SWC |
| Lishui      | Zhejiang     | SEC |
| Lianyungang | Jiangsu      | SEC |
| Liangshan   | Sichuan      | SWC |
| Liaoyang    | Liaoning     | NEC |
| Liaoyuan    | Jilin        | NEC |
| Liaocheng   | Shandong     | NC  |
| Lincang     | Yunnan       | SWC |
| Linfen      | Shanxi       | NC  |
| Linxia      | Gansu        | NWC |
| Linyi       | Shandong     | NC  |
| Liuzhou     | Guangxi      | SWC |
| Luan        | Anhui        | SEC |
| Liupanshui  | Guizhou      | SWC |
| Longyan     | Fujian       | SEC |
| Longnan     | Gansu        | NWC |
| Loudi       | Hunan        | SEC |
| Luzhou      | Sichuan      | SWC |
| Luoyang     | Henan        | NC  |
| Luohe       | Henan        | NC  |
| Lvliang     | Shanxi       | NC  |
| Maanshan    | Anhui        | SEC |
| Maoming     | Guangdong    | SEC |
| Meishan     | Sichuan      | SWC |
| Meizhou     | Guangdong    | SEC |
| Mianyang    | Sichuan      | SWC |
| Mudanjiang  | Heilongjiang | NEC |
| Nanchang    | Jiangxi      | SEC |
| Nanchong    | Sichuan      | SWC |
| Nanjing     | Jiangsu      | SEC |
| Nanning     | Guangxi      | SWC |
| Nanping     | Fujian       | SEC |

---

---

|              |              |     |
|--------------|--------------|-----|
| Nantong      | Jiangsu      | SEC |
| Nanyang      | Henan        | NC  |
| Neijiang     | Sichuan      | SWC |
| Ningbo       | Zhejiang     | SEC |
| Ningde       | Fujian       | SEC |
| Nujiang      | Yunnan       | SWC |
| Panzhihua    | Yunnan       | SWC |
| Panjin       | Liaoning     | NEC |
| Pingdingshan | Henan        | NC  |
| Pingliang    | Gansu        | NWC |
| Pingxiang    | Jiangxi      | SEC |
| Putian       | Fujian       | SEC |
| Puyang       | Henan        | NC  |
| Puer         | Yunnan       | SWC |
| Qitaihe      | Heilongjiang | NEC |
| Qiqihar      | Heilongjiang | NEC |
| Qiandongnan  | Guizhou      | SWC |
| Qiannan      | Guizhou      | SWC |
| Qianxinan    | Guizhou      | SWC |
| Qinzhou      | Guangxi      | SWC |
| Qinhuangdao  | Hebei        | NC  |
| Qingdao      | Shandong     | NC  |
| Qingyuan     | Guangdong    | SEC |
| Qingyang     | Gansu        | NWC |
| Quzhou       | Zhejiang     | SEC |
| Qujing       | Yunnan       | SWC |
| Quanzhou     | Fujian       | SEC |
| Rizhao       | Shandong     | NC  |
| Sanmenxia    | Henan        | NC  |
| Sanming      | Fujian       | SEC |
| Sanya        | Hainan       | SEC |
| Xiamen       | Fujian       | SEC |
| Shantou      | Guangdong    | SEC |
| Shanwei      | Guangdong    | SEC |
| Shangluo     | Henan        | NC  |
| Shangqiu     | Henan        | NC  |
| Shanghai     | Shanghai     | SEC |
| Shangrao     | Jiangxi      | SEC |
| Shaoguan     | Guangdong    | SEC |
| Shaoyang     | Hunan        | SEC |
| Shaoxing     | Zhejiang     | SEC |
| Shenzhen     | Guangdong    | SEC |
| Shenyang     | Liaoning     | NEC |
| Shiyan       | Hubei        | SEC |

---

---

|               |                |      |
|---------------|----------------|------|
| Shijiazhuang  | Hebei          | NC   |
| Shizuishan    | Ningxia        | NWC  |
| Shuangyashan  | Heilongjiang   | NEC  |
| Shuozhou      | Shanxi         | NC   |
| Siping        | Jilin          | NEC  |
| Songyuan      | Jilin          | NEC  |
| Suzhou        | Jiangsu        | SEC  |
| Suizhou       | Suizhou        | #N/A |
| Suining       | Sichuan        | SWC  |
| Tacheng       | Xinjiang       | NWC  |
| Taizhou       | Zhejiang       | SEC  |
| Taiyuan       | Shanxi         | NC   |
| Taian         | Shandong       | NC   |
| Taizhou       | Jiangsu        | SEC  |
| Tangshan      | Hebei          | NC   |
| Tianshui      | Gansu          | NWC  |
| Tieling       | Liaoning       | NEC  |
| Tonghua       | Jilin          | NEC  |
| Tongliao      | Inner Mongolia | NC   |
| Tongchuan     | Shaanxi        | NWC  |
| Tongling      | Anhui          | SEC  |
| Tongren       | Guizhou        | SWC  |
| Weihai        | Shandong       | NC   |
| Weifang       | Shandong       | NC   |
| Weinan        | Shaanxi        | NWC  |
| Wenzhou       | Zhejiang       | SEC  |
| Wenshan       | Yunnan         | SWC  |
| Ulanqab       | Inner Mongolia | NC   |
| Urumqi        | Xinjiang       | NWC  |
| Wuxi          | Jiangsu        | SEC  |
| Wuhu          | Anhui          | SEC  |
| Wuzhong       | Ningxia        | NWC  |
| Wuzhou        | Guangxi        | SWC  |
| Wuhan         | Hubei          | SEC  |
| Wuwei         | Gansu          | NWC  |
| Xi'an         | Shaanxi        | NWC  |
| Xining        | Qinghai        | NWC  |
| Xishuangbanna | Yunnan         | SWC  |
| Xilin Gol     | Inner Mongolia | NC   |
| Xianning      | Hubei          | SEC  |
| Xianyang      | Shaanxi        | NWC  |
| Xiangtan      | Hebei          | NC   |
| Xiangxi       | Hunan          | SEC  |
| Xiangyang     | Hubei          | SEC  |

---

---

|             |              |     |
|-------------|--------------|-----|
| Xiaogan     | Hubei        | SEC |
| Xinzhou     | Shanxi       | NC  |
| Xinxiang    | Henan        | NC  |
| Xinyu       | Jiangxi      | SEC |
| Xinyang     | Henan        | NC  |
| Xingtai     | Hebei        | NC  |
| Xing'an     | Heilongjiang | NEC |
| Suqian      | Jiangsu      | SEC |
| Suzhou      | Anhui        | SEC |
| Xuzhou      | Jiangsu      | SEC |
| Xuchang     | Henan        | NC  |
| Xuancheng   | Anhui        | SEC |
| Ya'an       | Sichuan      | SWC |
| Yantai      | Shandong     | NC  |
| Yan'an      | Shaanxi      | NWC |
| Yanbian     | Jilin        | NEC |
| Yancheng    | Jiangsu      | SEC |
| Yangzhou    | Jiangsu      | SEC |
| Yangjiang   | Guangdong    | SEC |
| Yangquan    | Shanxi       | NC  |
| Yichun      | Jiangxi      | SEC |
| Yili        | Xinjiang     | NWC |
| Yibin       | Sichuan      | SWC |
| Yichang     | Hubei        | SEC |
| Yichun      | Heilongjiang | NEC |
| Yiyang      | Hunan        | SEC |
| Yinchuan    | Ningxia      | NWC |
| Yingtian    | Jiangxi      | SEC |
| Yingkou     | Liaoning     | NEC |
| Yongzhou    | Hunan        | SEC |
| Yulin       | Shaanxi      | NWC |
| Yulin       | Guangxi      | SWC |
| Yuxi        | Yunnan       | SWC |
| Yueyang     | Hunan        | SEC |
| Yunfu       | Guangdong    | SEC |
| Yuncheng    | Shanxi       | NC  |
| Zaozhuang   | Shandong     | NC  |
| Zhanjiang   | Guangdong    | SEC |
| Zhangjiajie | Hunan        | SEC |
| Zhangjiakou | Hebei        | NC  |
| Zhangye     | Gansu        | NWC |
| Zhangzhou   | Fujian       | SEC |
| Changchun   | Jilin        | NEC |
| Changsha    | Hunan        | SEC |

---



---

|           |           |     |
|-----------|-----------|-----|
| Changzhi  | Shanxi    | NC  |
| Zhaotong  | Yunnan    | SWC |
| Zhaoqing  | Guangdong | SEC |
| Zhenjiang | Jiangsu   | SEC |
| Zhengzhou | Henan     | NC  |
| Zhongshan | Guangdong | SEC |
| Zhongwei  | Shanxi    | NC  |
| Chongqing | Chongqing | SWC |
| Zhoushan  | Zhejiang  | SEC |
| Zhoukou   | Henan     | NC  |
| Zhuhai    | Guangdong | SEC |
| Zhuzhou   | Hunan     | SEC |
| Zhumadian | Henan     | NC  |
| Ziyang    | Sichuan   | SWC |
| Zibo      | Shandong  | NC  |
| Zigong    | Sichuan   | SWC |
| Zunyi     | Guizhou   | SWC |

---

**Tab. S2** The correlation coefficients of water-soluble ions and meteorological conditions.

|                              | pH   | NO <sub>3</sub> <sup>-</sup> | Cl <sup>-</sup>   | Ca <sup>2+</sup>   | K <sup>+</sup>     | EC                | F <sup>-</sup>     | NH <sub>4</sub> <sup>+</sup> | Mg <sup>2+</sup>   | SO <sub>4</sub> <sup>2-</sup> | Na <sup>+</sup>   | PM <sub>2.5</sub> | PM <sub>10</sub>  | SO <sub>2</sub>    | NO <sub>2</sub>    | Precipitation      | T <sub>max</sub>   | T <sub>min</sub>   | Wind<br>speed      | Air pressure      | RH                 |
|------------------------------|------|------------------------------|-------------------|--------------------|--------------------|-------------------|--------------------|------------------------------|--------------------|-------------------------------|-------------------|-------------------|-------------------|--------------------|--------------------|--------------------|--------------------|--------------------|--------------------|-------------------|--------------------|
| pH                           | 1.00 | -0.12 <sup>a</sup>           | 0.12 <sup>a</sup> | 0.18 <sup>b</sup>  | 0.11               | 0.30 <sup>b</sup> | 0.00               | -0.10                        | 0.13 <sup>a</sup>  | -0.13 <sup>a</sup>            | 0.15 <sup>a</sup> | 0.15 <sup>a</sup> | 0.32 <sup>a</sup> | -0.25 <sup>b</sup> | -0.13 <sup>a</sup> | 0.58 <sup>b</sup>  | -0.26 <sup>b</sup> | -0.50 <sup>b</sup> | 0.20 <sup>b</sup>  | -0.07             | -0.33 <sup>b</sup> |
| NO <sub>3</sub> <sup>-</sup> |      | 1.00                         | 0.41 <sup>b</sup> | -0.47 <sup>b</sup> | -0.19 <sup>b</sup> | -                 | 0.39 <sup>b</sup>  | 0.51 <sup>b</sup>            | -0.10              | 0.39 <sup>b</sup>             | 0.08              | 0.29 <sup>b</sup> | 0.23 <sup>b</sup> | 0.16 <sup>b</sup>  | 0.36 <sup>b</sup>  | 0.08               | 0.13 <sup>a</sup>  | 0.14 <sup>a</sup>  | -0.01              | 0.17 <sup>b</sup> | 0.13 <sup>a</sup>  |
|                              |      |                              |                   |                    |                    | 0.05              |                    |                              |                    |                               |                   |                   |                   |                    |                    |                    |                    |                    |                    |                   |                    |
| Cl <sup>-</sup>              |      |                              | 1.00              | -0.57 <sup>b</sup> | -0.38 <sup>b</sup> | 0.05              | 0.32 <sup>b</sup>  | 0.17 <sup>b</sup>            | 0.14 <sup>a</sup>  | 0.34 <sup>b</sup>             | 0.29 <sup>b</sup> | 0.21 <sup>b</sup> | 0.23 <sup>b</sup> | 0.06               | 0.22 <sup>b</sup>  | -0.06              | 0.00               | 0.02               | -0.14 <sup>a</sup> | 0.08              | -0.01              |
| Ca <sup>2+</sup>             |      |                              |                   | 1.00               | 0.40 <sup>b</sup>  | 0.17 <sup>b</sup> | -0.27 <sup>b</sup> | -0.22 <sup>b</sup>           | 0.38 <sup>b</sup>  | -0.20 <sup>b</sup>            | 0.19 <sup>b</sup> | 0.23 <sup>b</sup> | 0.25 <sup>b</sup> | -0.19 <sup>b</sup> | -0.20 <sup>b</sup> | -0.08              | 0.02               | -0.02              | 0.15 <sup>a</sup>  | 0.08              | 0.01               |
| K <sup>+</sup>               |      |                              |                   |                    | 1.00               | 0.01              | -0.31 <sup>b</sup> | -0.20 <sup>b</sup>           | 0.49 <sup>b</sup>  | -0.23 <sup>b</sup>            | 0.11 <sup>a</sup> | 0.01              | 0.03              | -0.03              | -0.05              | -0.00              | 0.02               | 0.03               | 0.02               | 0.07              | 0.09               |
| EC                           |      |                              |                   |                    |                    | 1.00              | -0.07              | -0.11                        | 0.11               | 0.07                          | 0.06              | 0.08              | 0.22 <sup>b</sup> | 0.19 <sup>b</sup>  | 0.13 <sup>a</sup>  | -0.25 <sup>b</sup> | -0.08              | -0.21 <sup>b</sup> | 0.13 <sup>a</sup>  | -0.02             | -0.14 <sup>a</sup> |
| F <sup>-</sup>               |      |                              |                   |                    |                    |                   | 1.00               | 0.48 <sup>b</sup>            | 0.13 <sup>a</sup>  | 0.55 <sup>b</sup>             | 0.13 <sup>a</sup> | 0.12 <sup>a</sup> | 0.07              | 0.04               | 0.10               | 0.08               | 0.12 <sup>a</sup>  | 0.13 <sup>a</sup>  | -0.03              | 0.15 <sup>a</sup> | 0.17 <sup>b</sup>  |
| NH <sub>4</sub> <sup>+</sup> |      |                              |                   |                    |                    |                   |                    | 1.00                         | -0.33 <sup>b</sup> | 0.42 <sup>b</sup>             | 0.33 <sup>b</sup> | 0.22 <sup>b</sup> | 0.16 <sup>b</sup> | 0.07               | 0.21 <sup>b</sup>  | 0.10               | 0.13 <sup>a</sup>  | 0.14 <sup>a</sup>  | 0.04               | 0.15 <sup>a</sup> | 0.13 <sup>a</sup>  |
| Mg <sup>2+</sup>             |      |                              |                   |                    |                    |                   |                    |                              | 1.00               | -0.31 <sup>b</sup>            | 0.33 <sup>b</sup> | 0.19 <sup>b</sup> | 0.19 <sup>b</sup> | -0.13 <sup>a</sup> | -0.11              | -0.10              | -0.03              | -0.06              | 0.11               | 0.07              | 0.02               |

---

|                               |      |      |                   |                   |                   |                   |                    |                   |                    |                    |                   |                    |
|-------------------------------|------|------|-------------------|-------------------|-------------------|-------------------|--------------------|-------------------|--------------------|--------------------|-------------------|--------------------|
| SO <sub>4</sub> <sup>2-</sup> | 1.00 | 0.09 | 0.25 <sup>b</sup> | 0.11              | 0.34 <sup>b</sup> | 0.14 <sup>a</sup> | 0.03               | 0.04              | 0.04               | 0.10               | 0.16 <sup>a</sup> | 0.12 <sup>a</sup>  |
| Na <sup>+</sup>               |      | 1.00 | -0.09             | -0.06             | 0.01              | -0.06             | 0.00               | -0.06             | -0.04              | -0.01              | -0.01             | 0.10               |
| PM <sub>2.5</sub>             |      |      | 1.00              | 0.90 <sup>b</sup> | 0.56 <sup>b</sup> | 0.72 <sup>b</sup> | -0.22 <sup>b</sup> | 0.08              | 0.01               | -0.12 <sup>a</sup> | 0.29 <sup>b</sup> | 0.04               |
| PM <sub>10</sub>              |      |      |                   | 1.00              | 0.61 <sup>b</sup> | 0.65 <sup>b</sup> | -0.38 <sup>b</sup> | -0.01             | -0.16 <sup>a</sup> | 0.19 <sup>b</sup>  | 0.21 <sup>b</sup> | -0.14 <sup>a</sup> |
| SO <sub>2</sub>               |      |      |                   |                   | 1.00              | 0.52 <sup>b</sup> | -0.34 <sup>b</sup> | -0.07             | 0.23 <sup>b</sup>  | -0.23 <sup>b</sup> | 0.13 <sup>a</sup> | -0.17 <sup>b</sup> |
| NO <sub>2</sub>               |      |      |                   |                   |                   | 1.00              | -0.12 <sup>a</sup> | 0.07              | -0.01              | 0.22 <sup>b</sup>  | 0.27 <sup>b</sup> | 0.03               |
| Precipitation                 |      |      |                   |                   |                   |                   | 1.00               | 0.55 <sup>b</sup> | 0.65 <sup>b</sup>  | -0.04              | 0.34 <sup>b</sup> | 0.60 <sup>b</sup>  |
| T <sub>max</sub>              |      |      |                   |                   |                   |                   |                    | 1.00              | 0.87 <sup>b</sup>  | 0.23 <sup>b</sup>  | 0.77 <sup>b</sup> | 0.82 <sup>b</sup>  |
| T <sub>min</sub>              |      |      |                   |                   |                   |                   |                    |                   | 1.00               | -0.10              | 0.52 <sup>b</sup> | 0.75 <sup>b</sup>  |
| Wind speed                    |      |      |                   |                   |                   |                   |                    |                   |                    | 1.00               | 0.63 <sup>b</sup> | 0.24 <sup>b</sup>  |
| Air pressure                  |      |      |                   |                   |                   |                   |                    |                   |                    |                    | 1.00              | 0.81 <sup>b</sup>  |
| RH                            |      |      |                   |                   |                   |                   |                    |                   |                    |                    |                   | 1.00               |

---

**Fig. S1** The  $EF_{sea}$  of  $Ca^{2+}$ ,  $Cl^-$ ,  $F^-$ ,  $K^+$ , and  $Mg^{2+}$ .

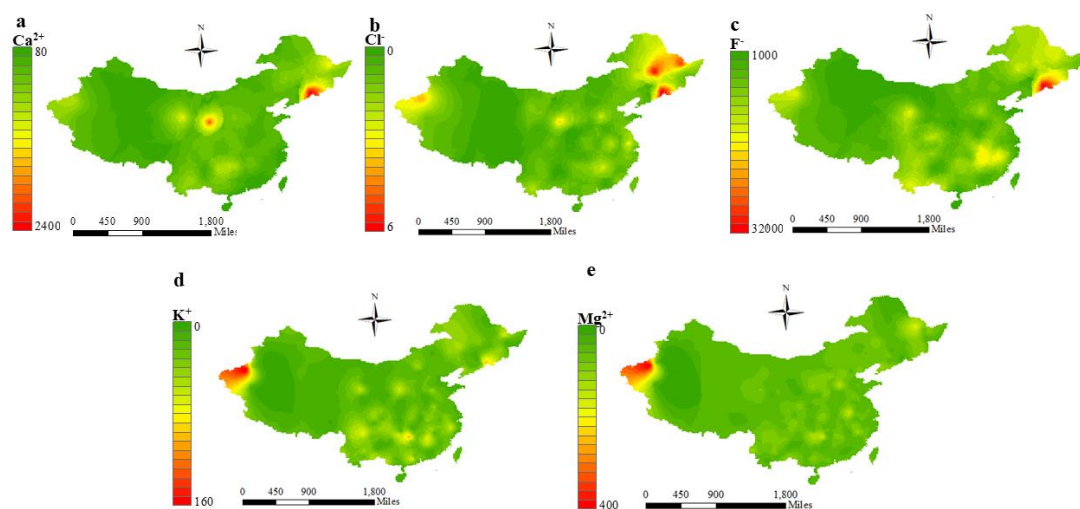

**Fig. S2** The  $EF_{soil}$  of  $Cl^-$ ,  $F^-$ ,  $K^+$ ,  $Mg^{2+}$ , and  $Na^+$ .

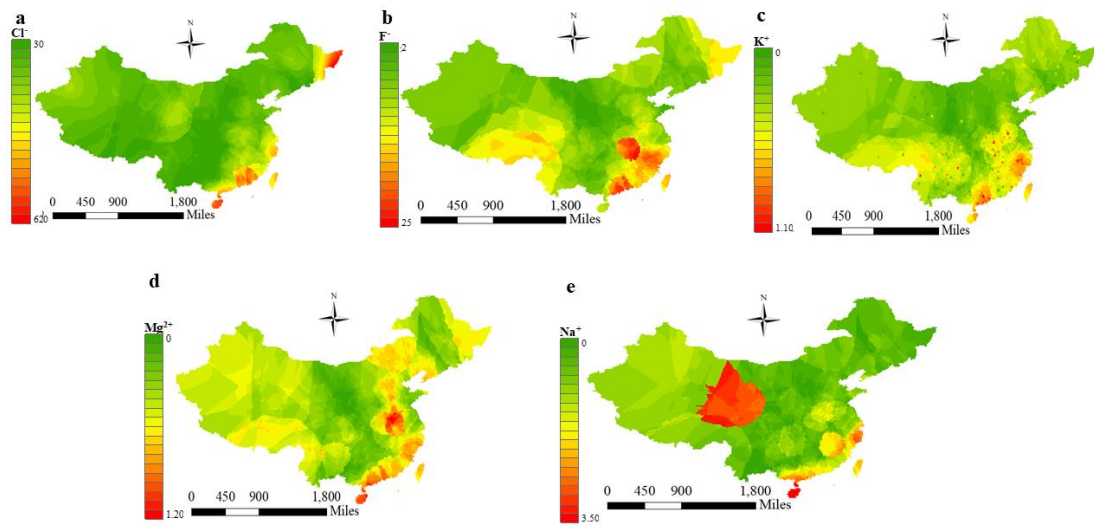

**Fig. S3** The spatial variation of SSF, CF, and AF for  $F^-$  and  $Cl^-$  in the precipitation.

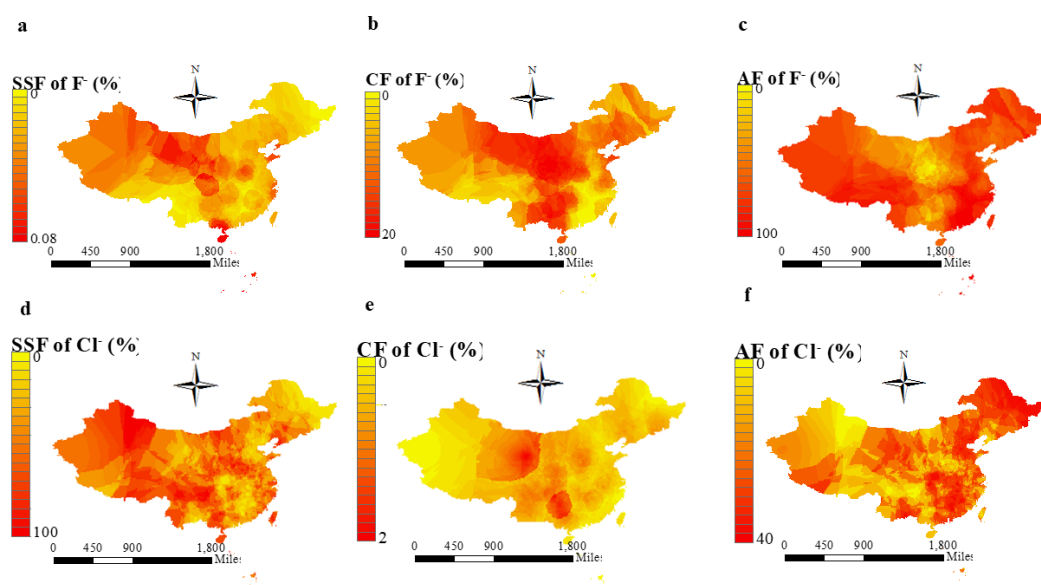

**Fig. S4** The spatial variation of SSF, CF, and AF for  $K^+$  and  $Mg^{2+}$  in the precipitation.

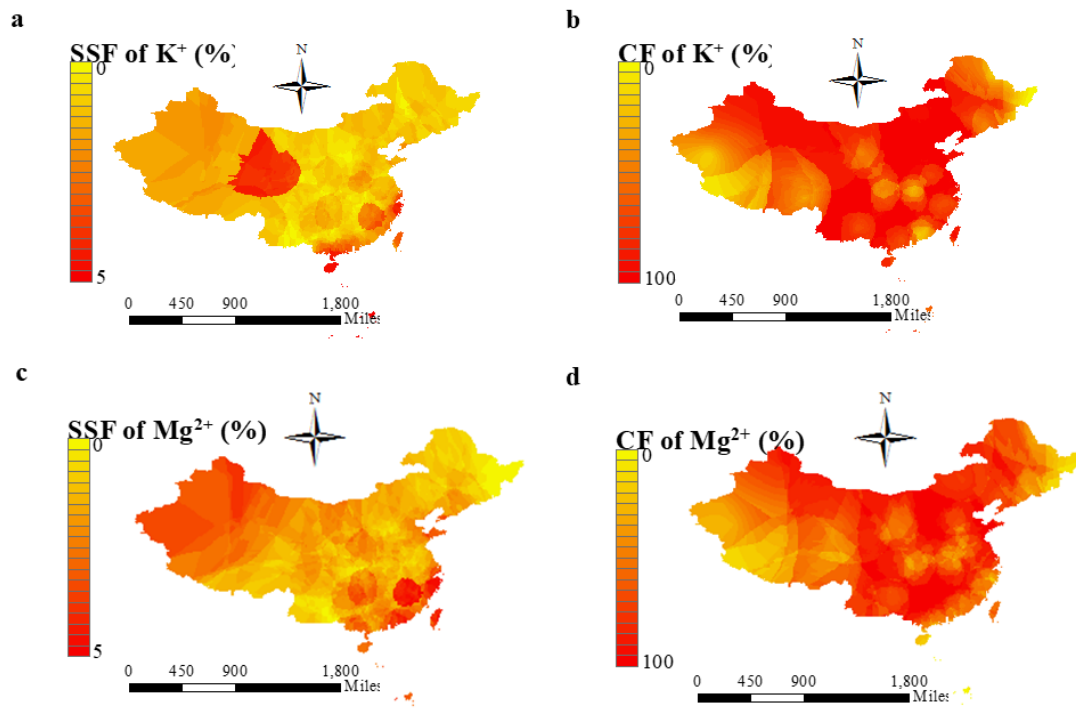

**Fig. S5** The deposition fluxes of nine inorganic ions at spatial scale

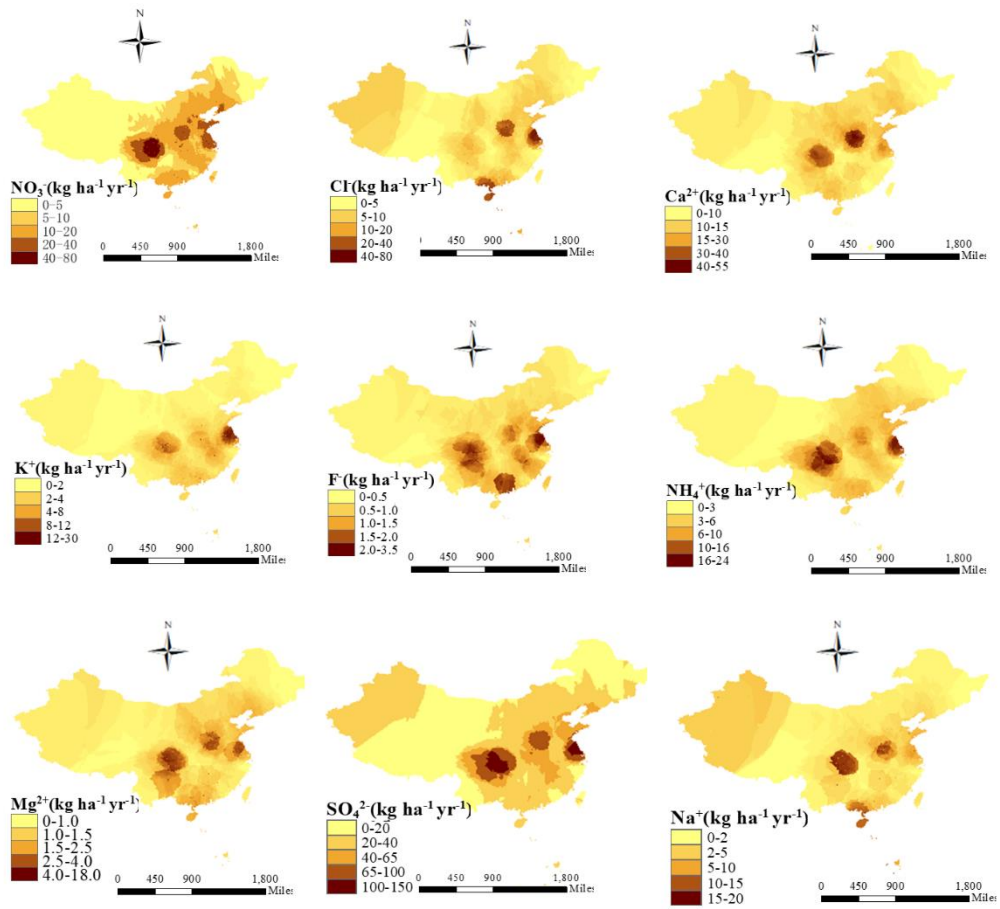



**Fig. S6** The local regression coefficient of influential factors for the  $\text{Ca}^{2+}$ ,  $\text{Cl}^-$ ,  $\text{F}^-$ ,  $\text{K}^+$ , and  $\text{Mg}^{2+}$ .

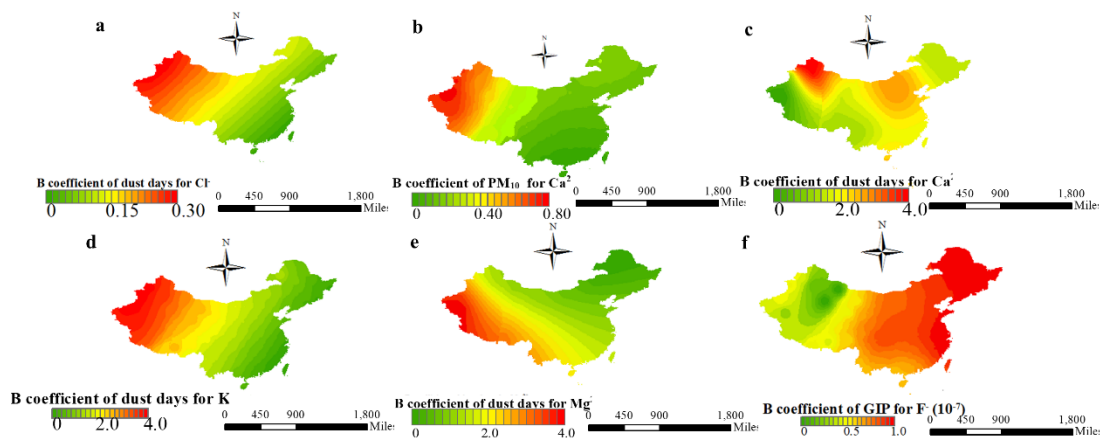

**Fig. S7** The precipitation and wet deposition fluxes of secondary ions in Arksu

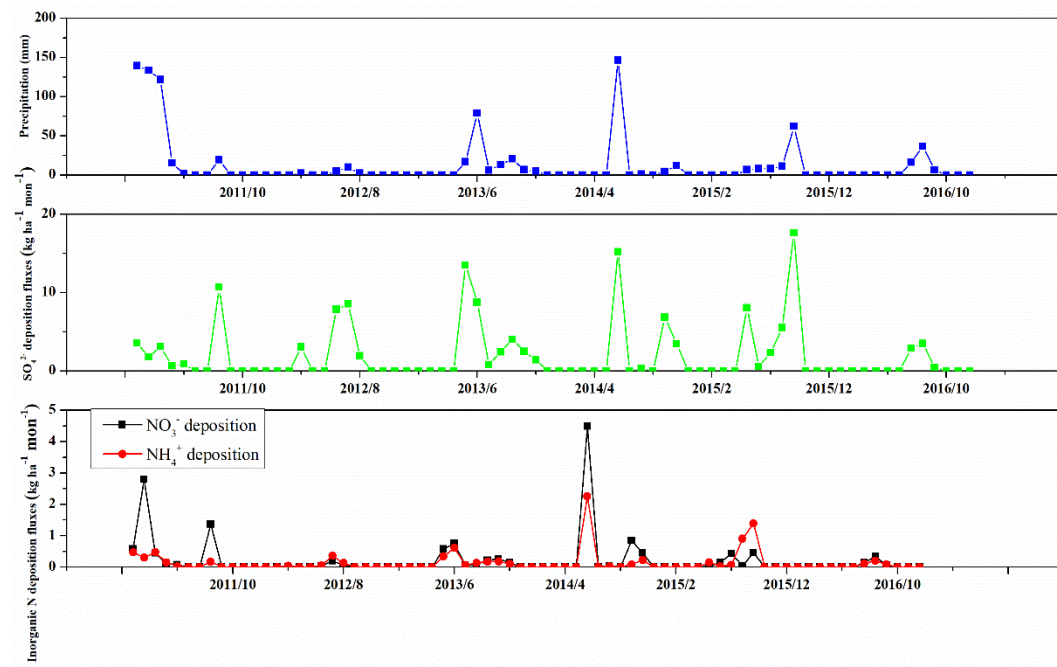

**Fig. S8** The precipitation and wet deposition fluxes of secondary ions in Anqing

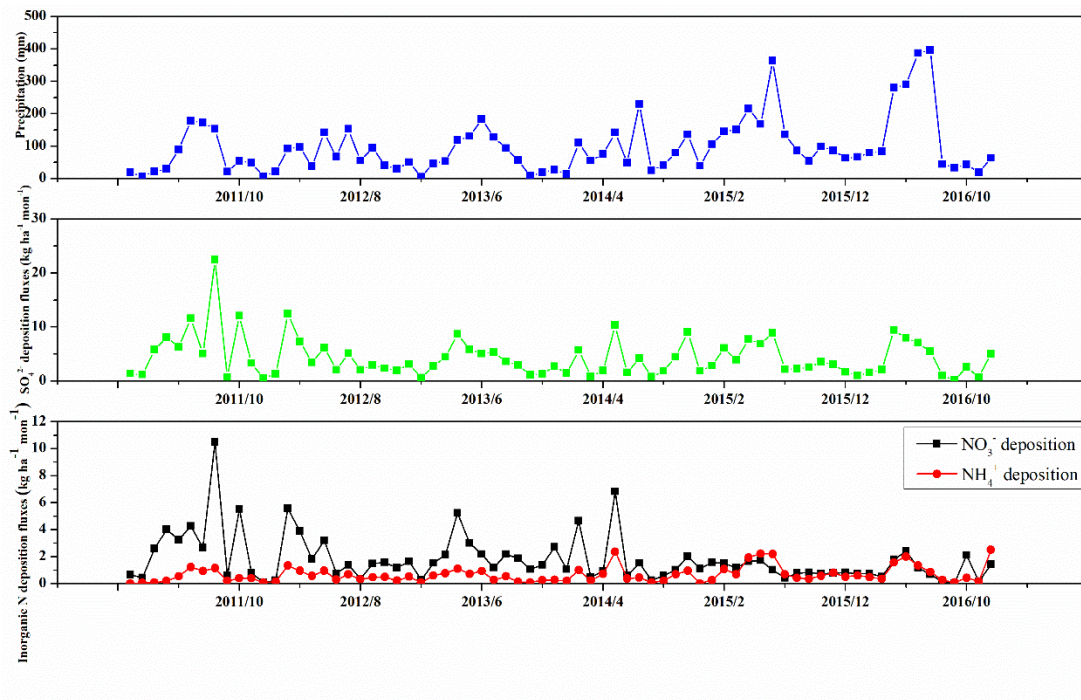

**Fig. S9** The precipitation and wet deposition fluxes of secondary ions in Anshan

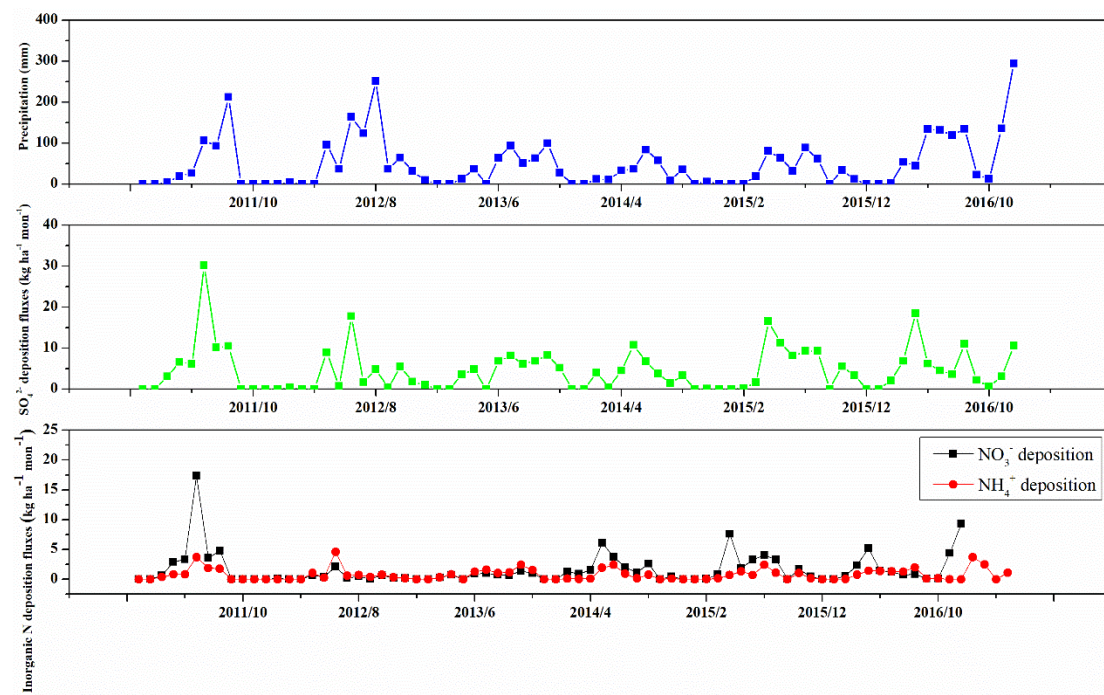

**Fig. S10** The precipitation and wet deposition fluxes of secondary ions in Baishan

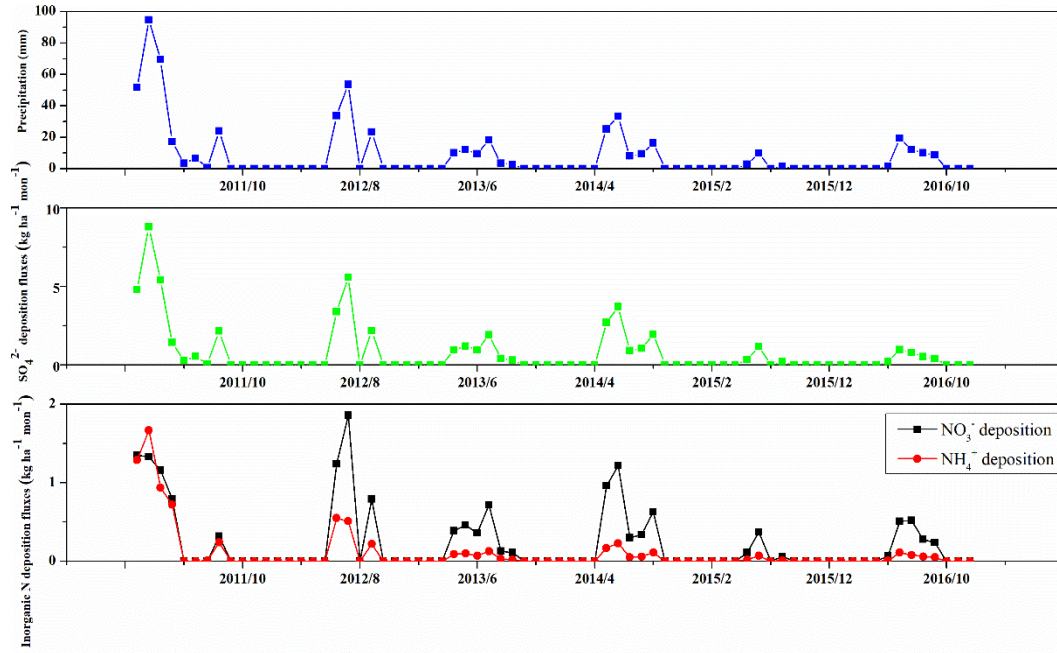

**Fig. S11** The precipitation and wet deposition fluxes of secondary ions in Bengbu

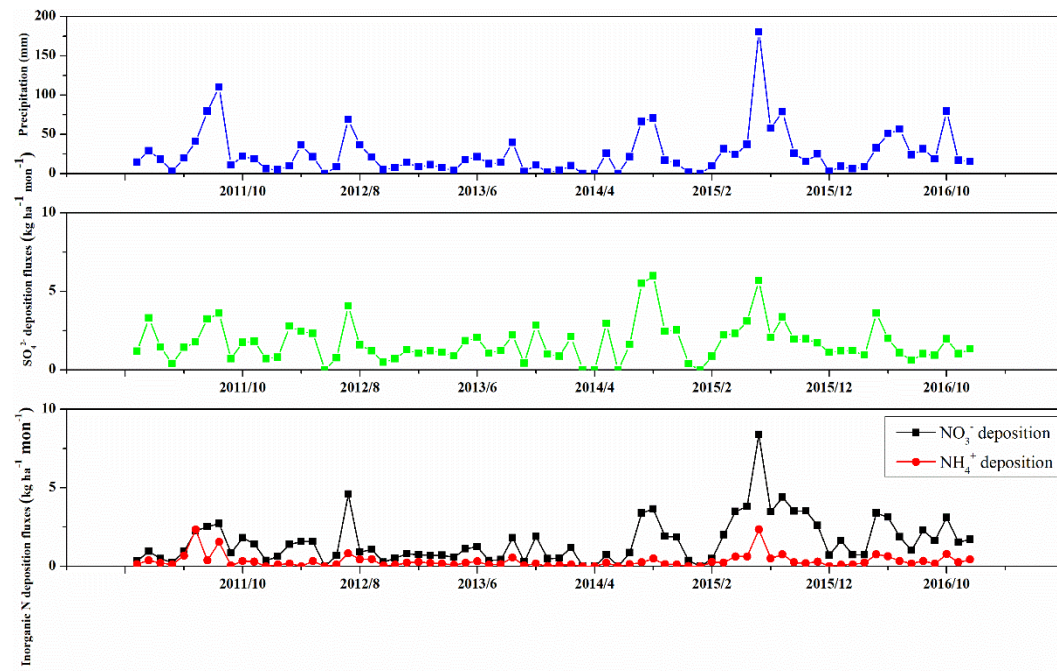

**Fig. S12** The precipitation and wet deposition fluxes of secondary ions in Beijing

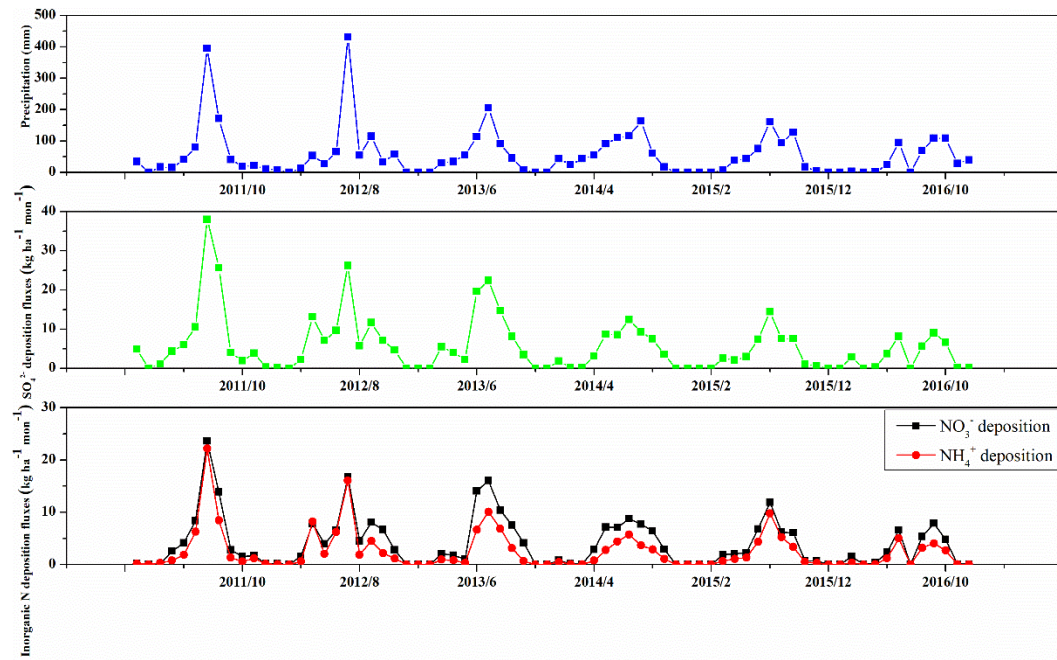

**Fig. S13** The precipitation and wet deposition fluxes of secondary ions in Benxi

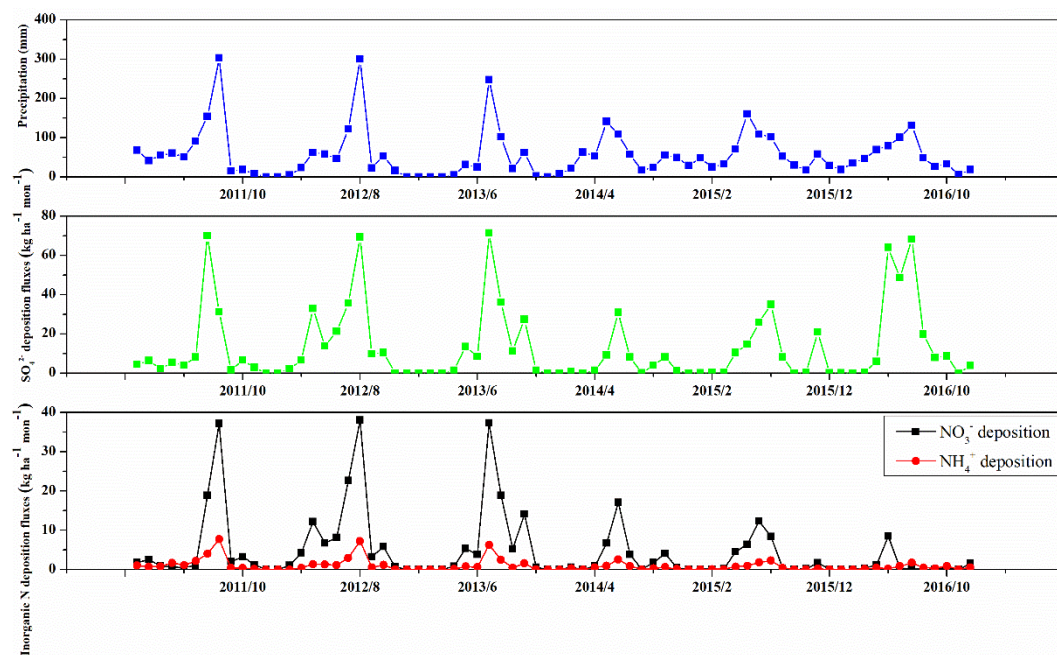



**Fig. S14** The precipitation and wet deposition fluxes of secondary ions in Binzhou

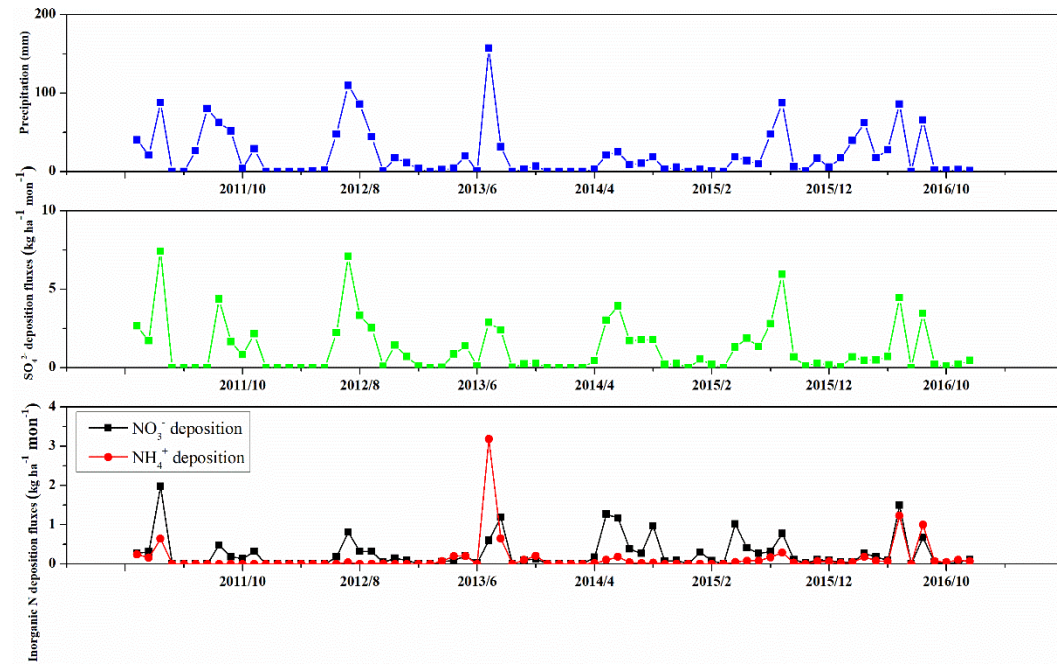

**Fig. S15** The precipitation and wet deposition fluxes of secondary ions in Cangzhou

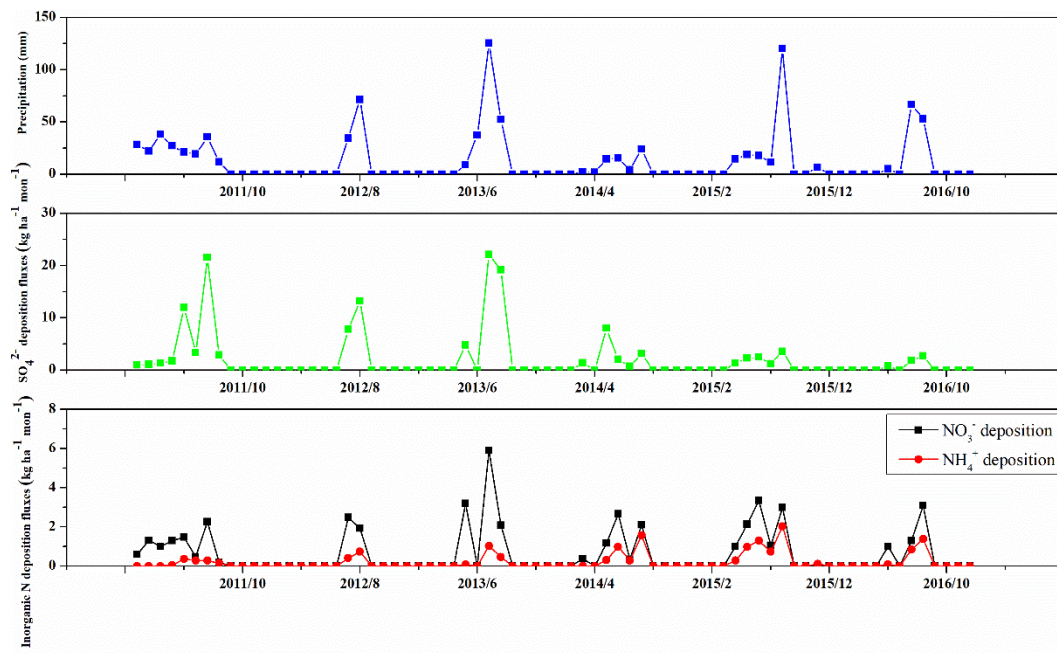

**Fig. S16** The precipitation and wet deposition fluxes of secondary ions in Changji

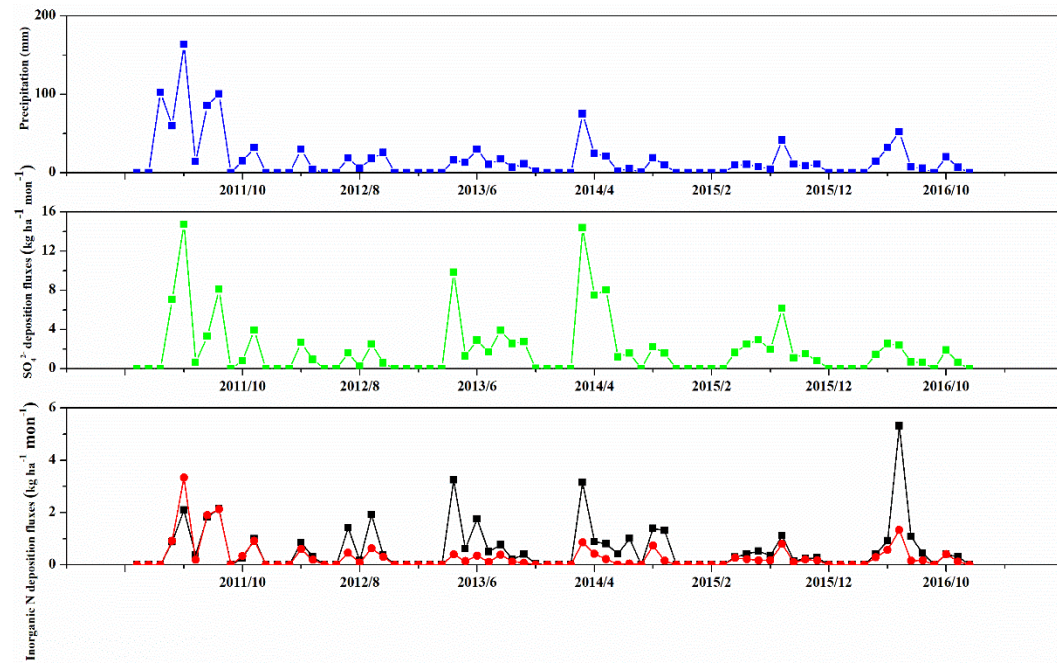

**Fig. S17** The precipitation and wet deposition fluxes of secondary ions in Changzhou

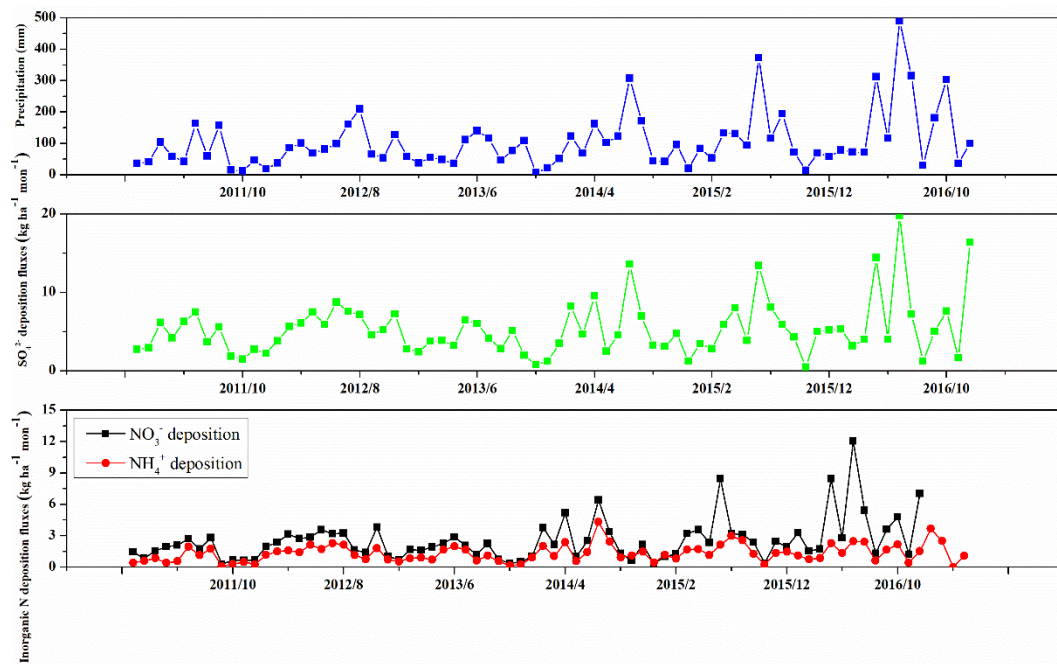

**Fig. S18** The precipitation and wet deposition fluxes of secondary ions in Chizhou

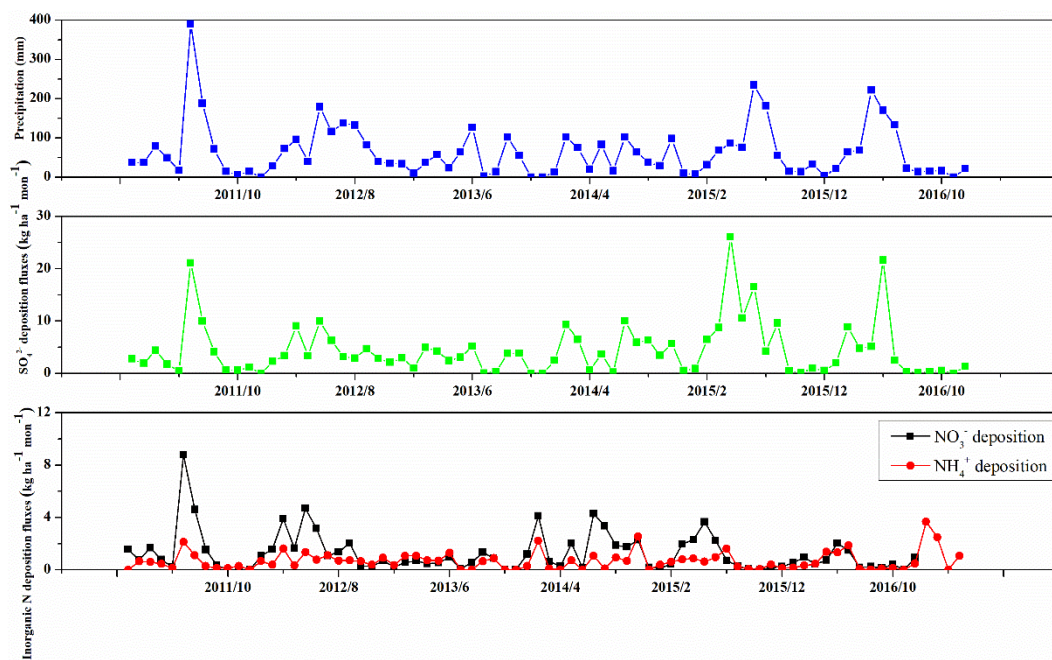

**Fig. S19** The precipitation and wet deposition fluxes of secondary ions in Chifeng

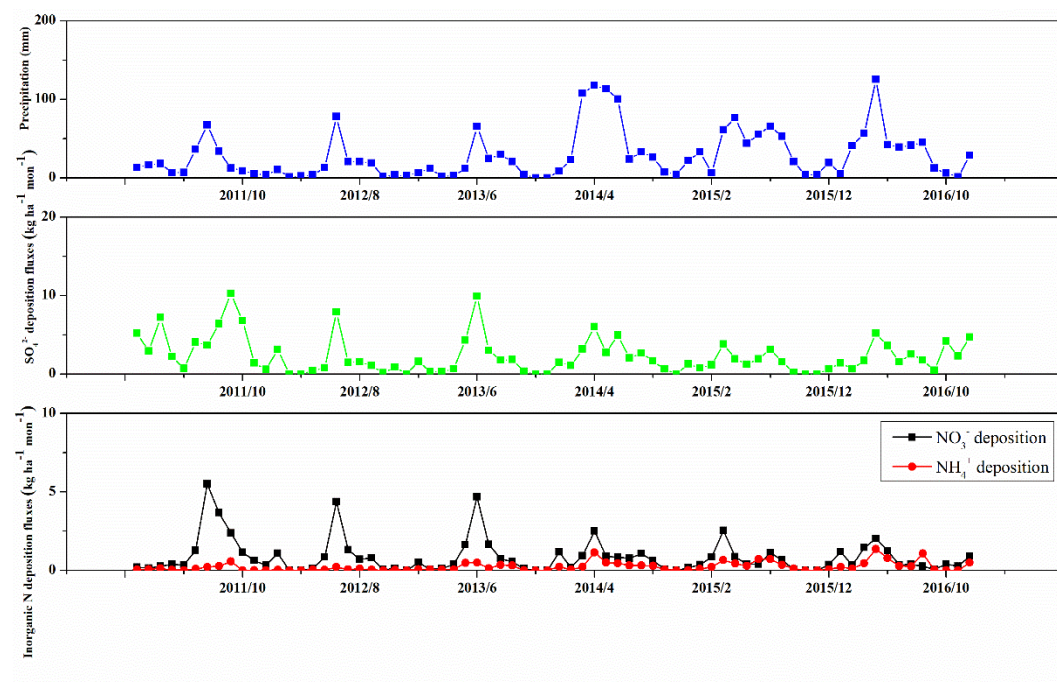

**Fig. S20** The precipitation and wet deposition fluxes of secondary ions in Chuxiong

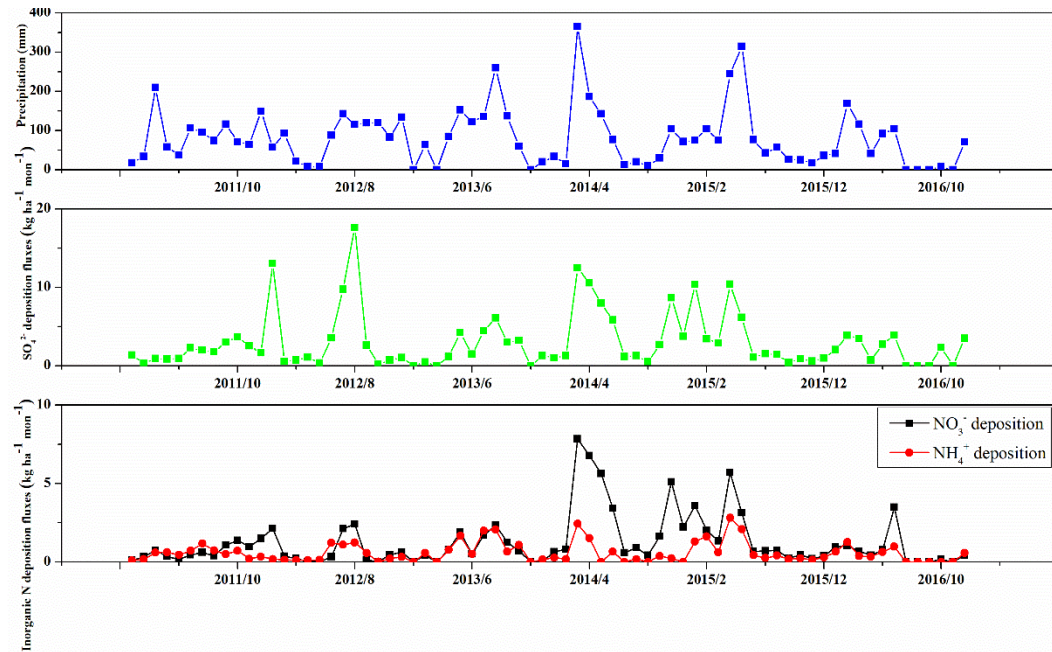

**Fig. S21** The precipitation and wet deposition fluxes of secondary ions in Dazhou

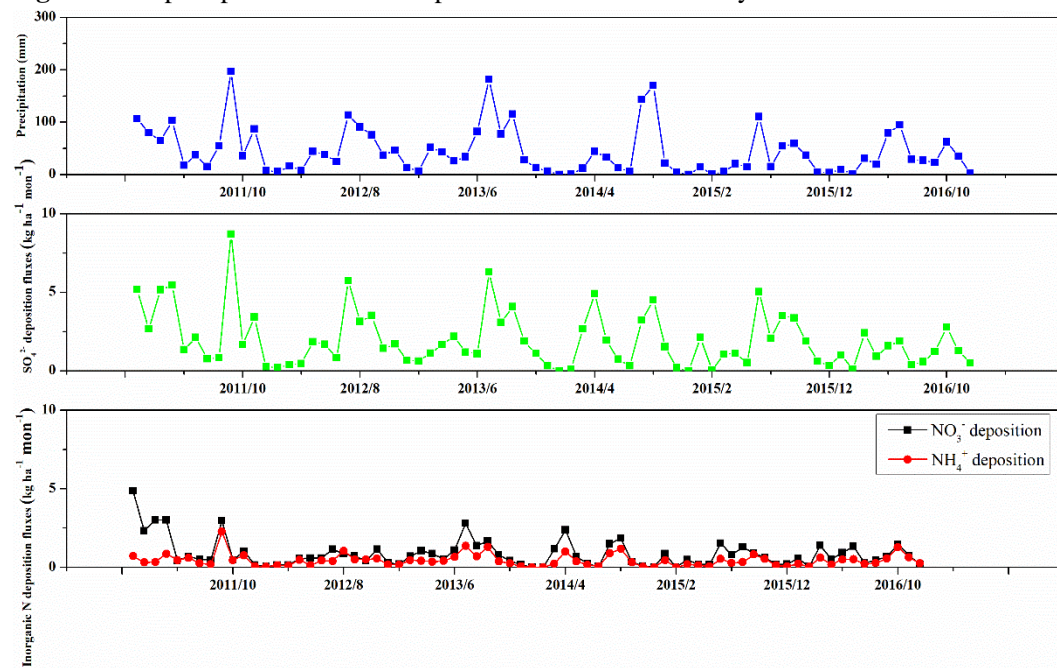



**Fig. S22** The precipitation and wet deposition fluxes of secondary ions in Dalian

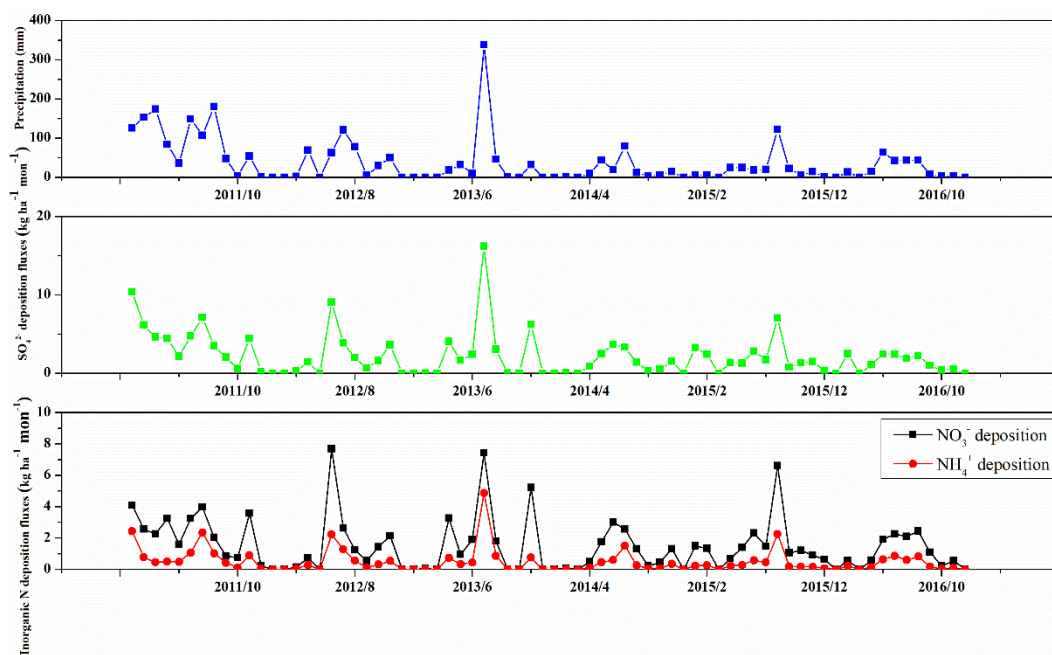

**Fig. S23** The precipitation and wet deposition fluxes of secondary ions in Daqing

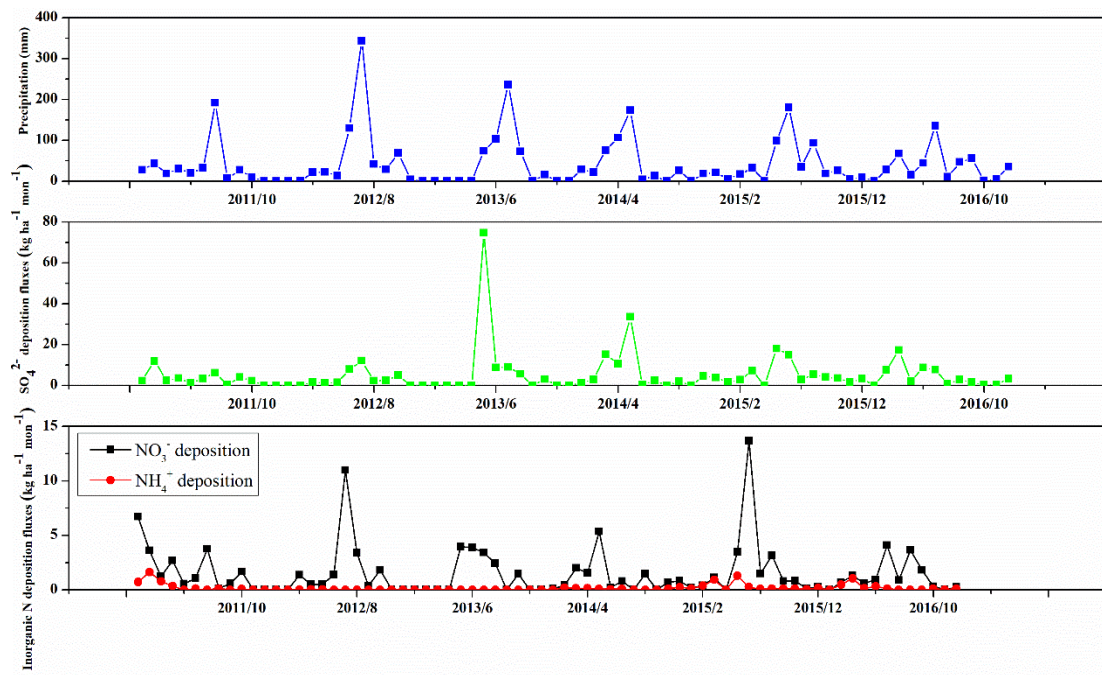

**Fig. S24** The precipitation and wet deposition fluxes of secondary ions in Dandong.

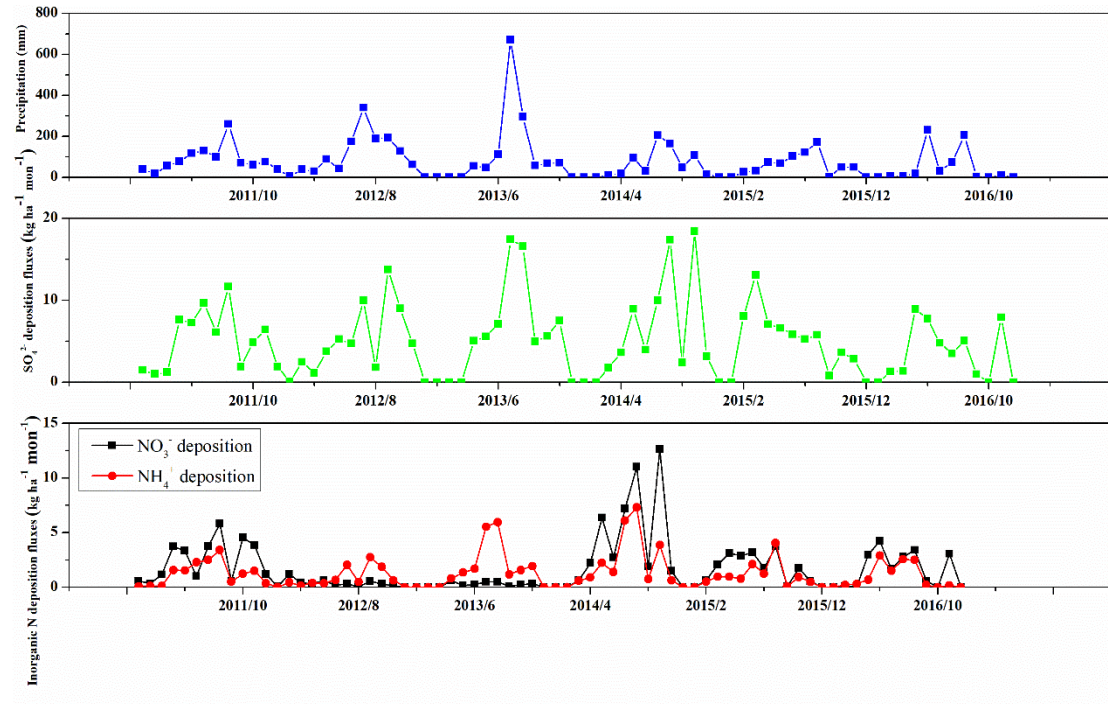

**Fig. S25** The precipitation and wet deposition fluxes of secondary ions in Dehong

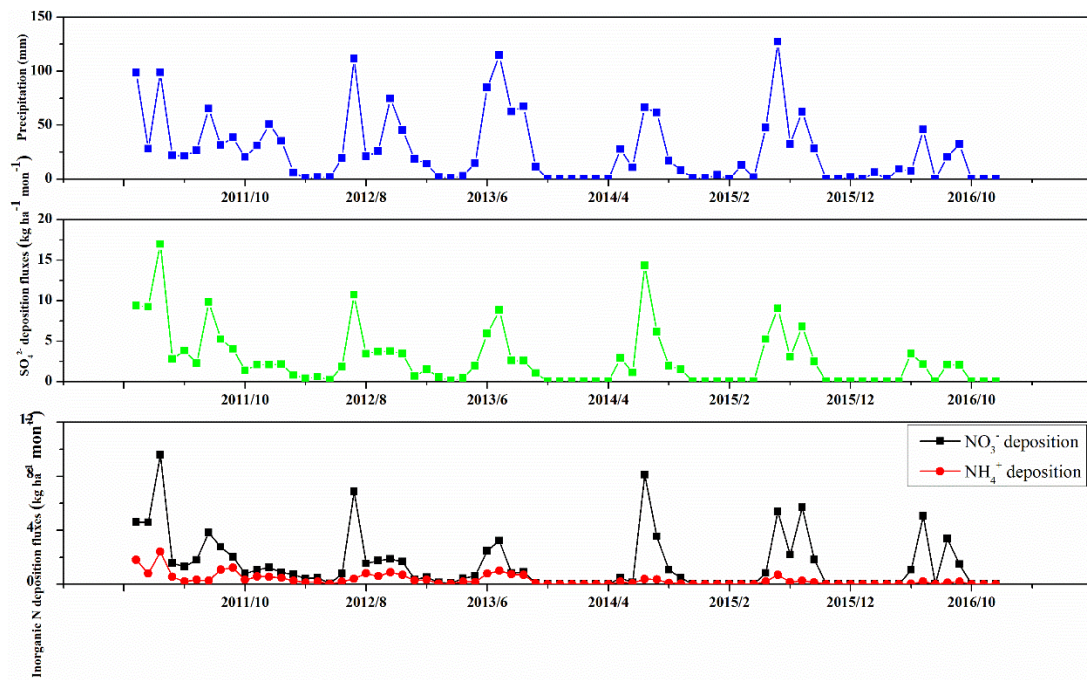

**Fig. S26** The precipitation and wet deposition fluxes of secondary ions in Erdos

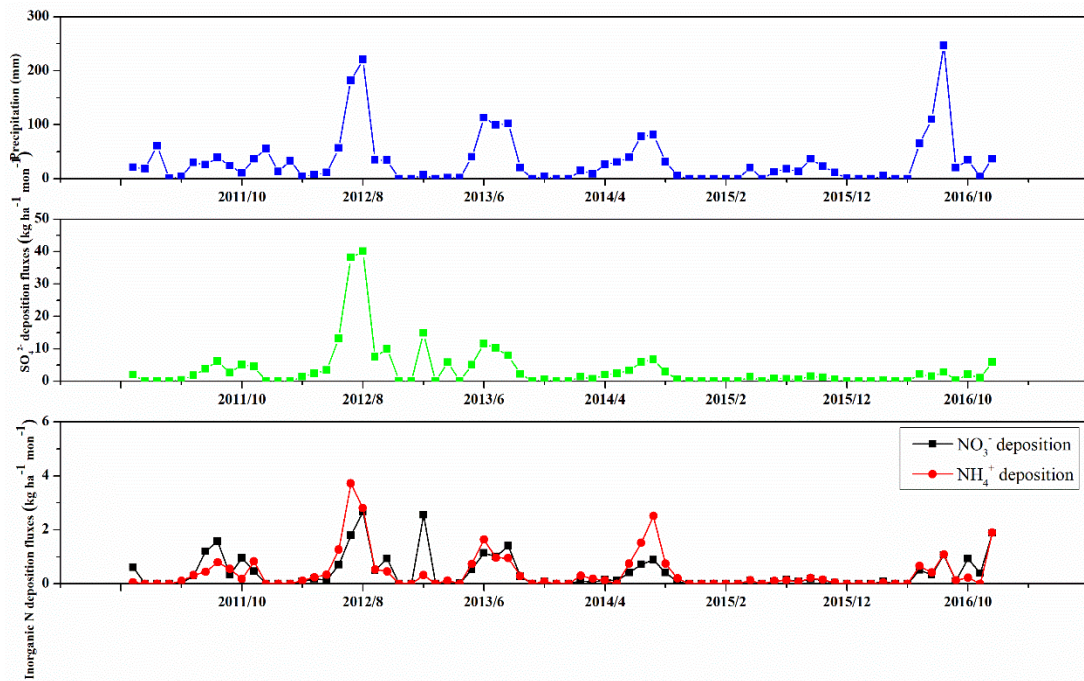

**Fig. S27** The precipitation and wet deposition fluxes of secondary ions in Foshan

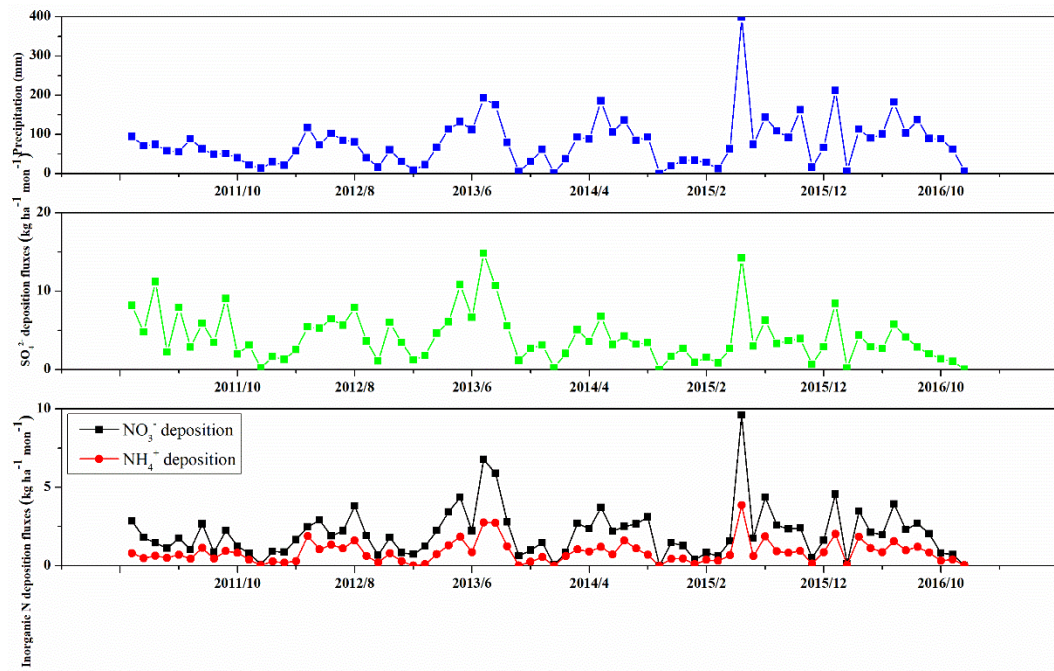

**Fig. S28** The precipitation and wet deposition fluxes of secondary ions in Fuzhou

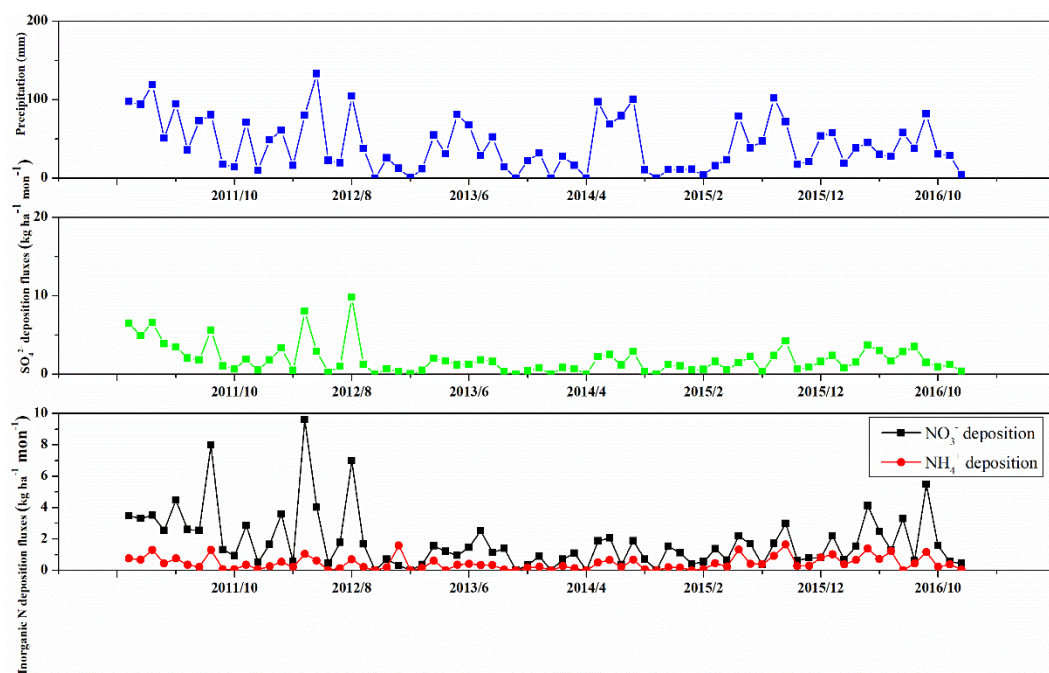

**Fig. S29** The precipitation and wet deposition fluxes of secondary ions in Fushun

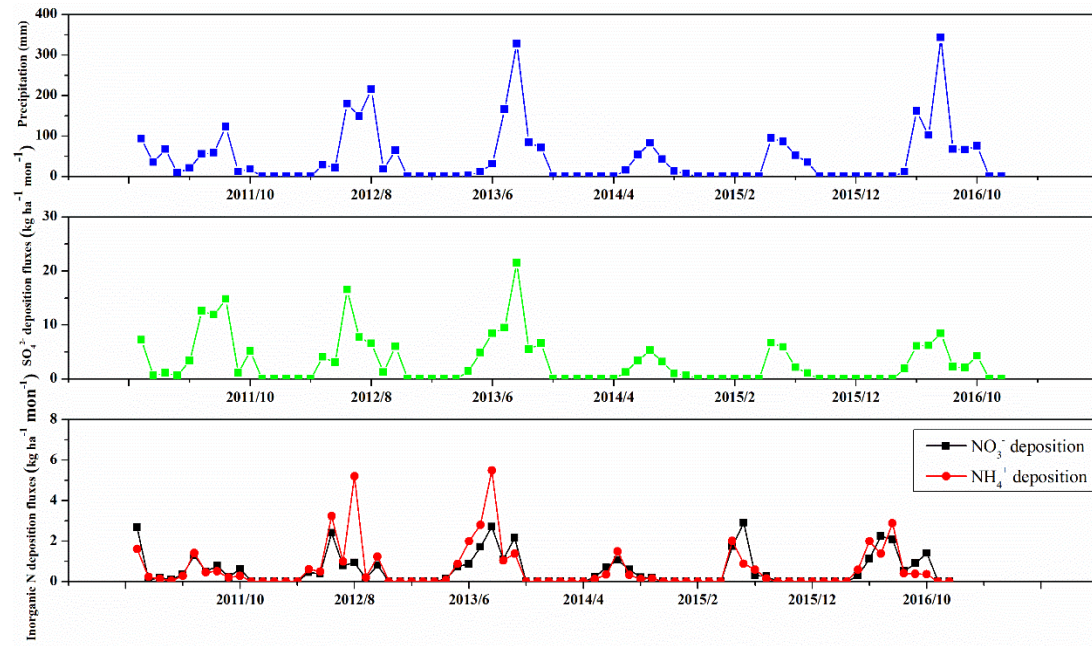



**Fig. S30** The precipitation and wet deposition fluxes of secondary ions in Fuzhou

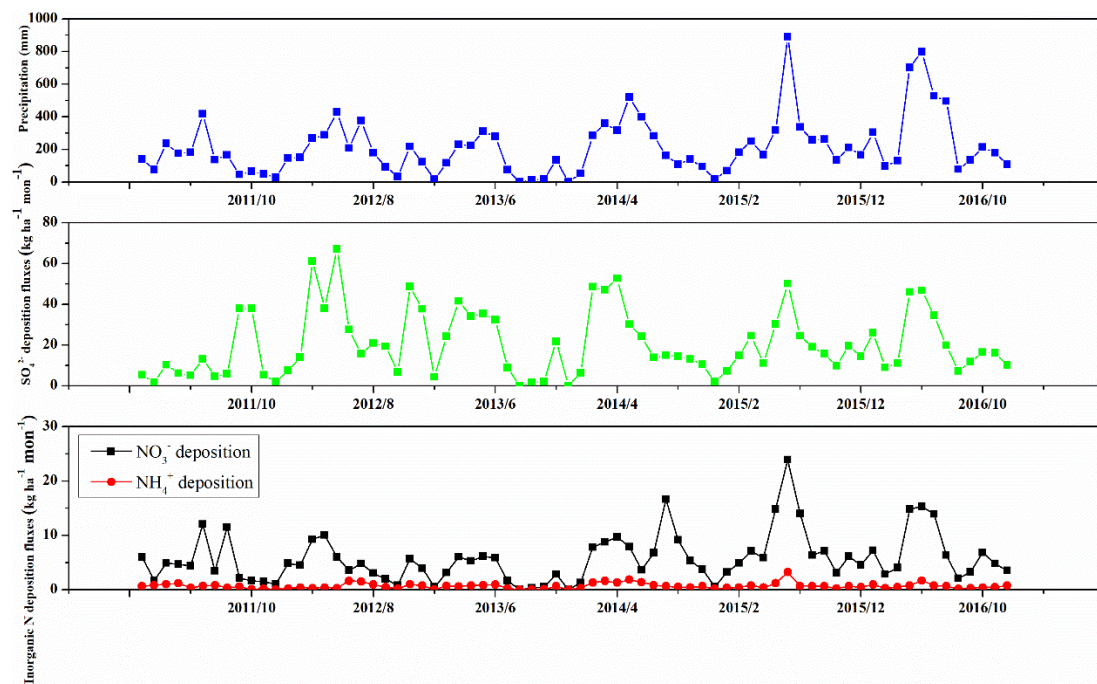

**Fig. S31** The precipitation and wet deposition fluxes of secondary ions in Fuxin

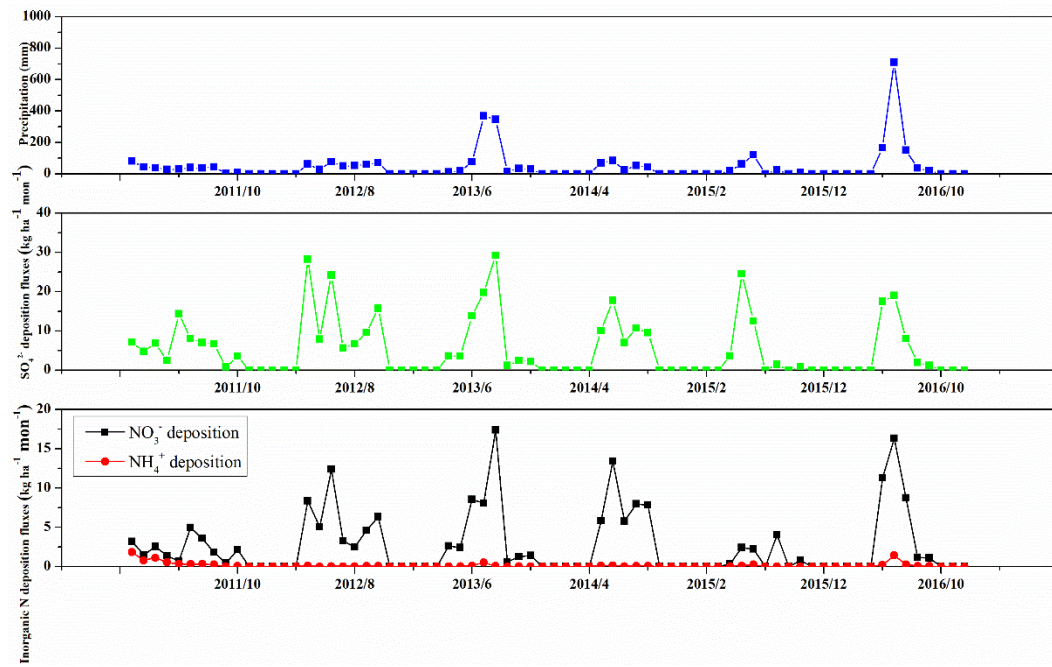

**Fig. S32** The precipitation and wet deposition fluxes of secondary ions in Fuyang

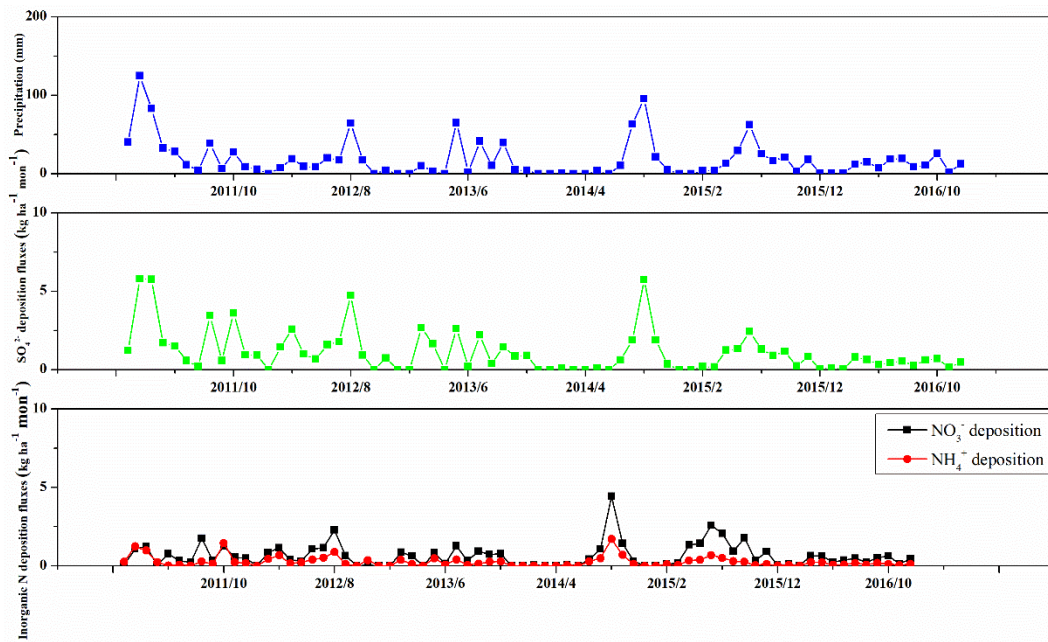

**Fig. S33** The precipitation and wet deposition fluxes of secondary ions in Ganzhou

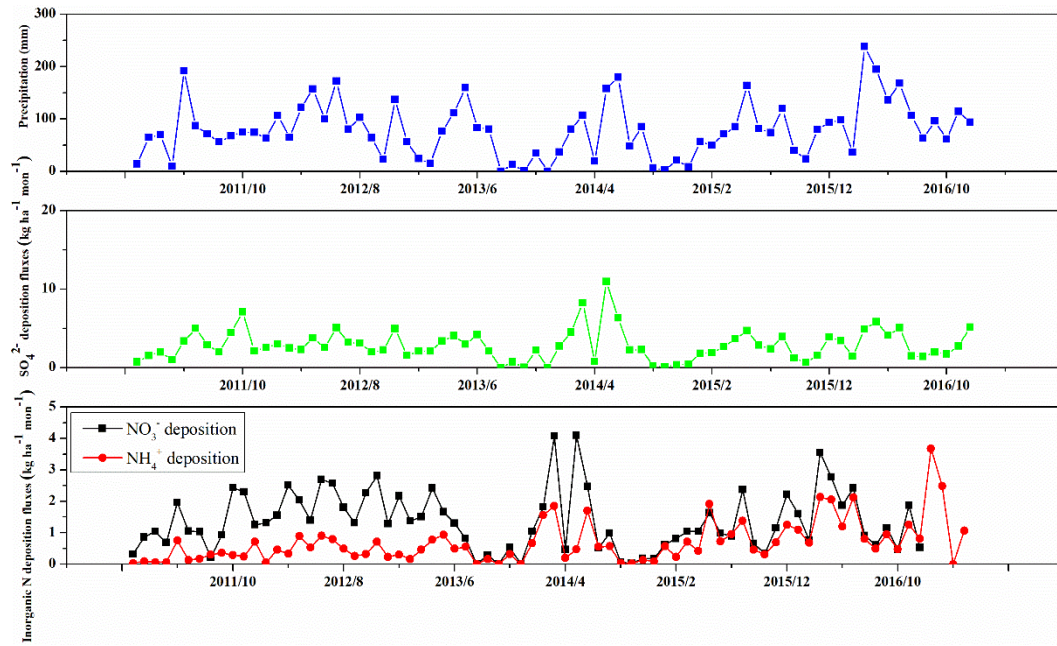

**Fig. S34** The precipitation and wet deposition fluxes of secondary ions in Guyuan

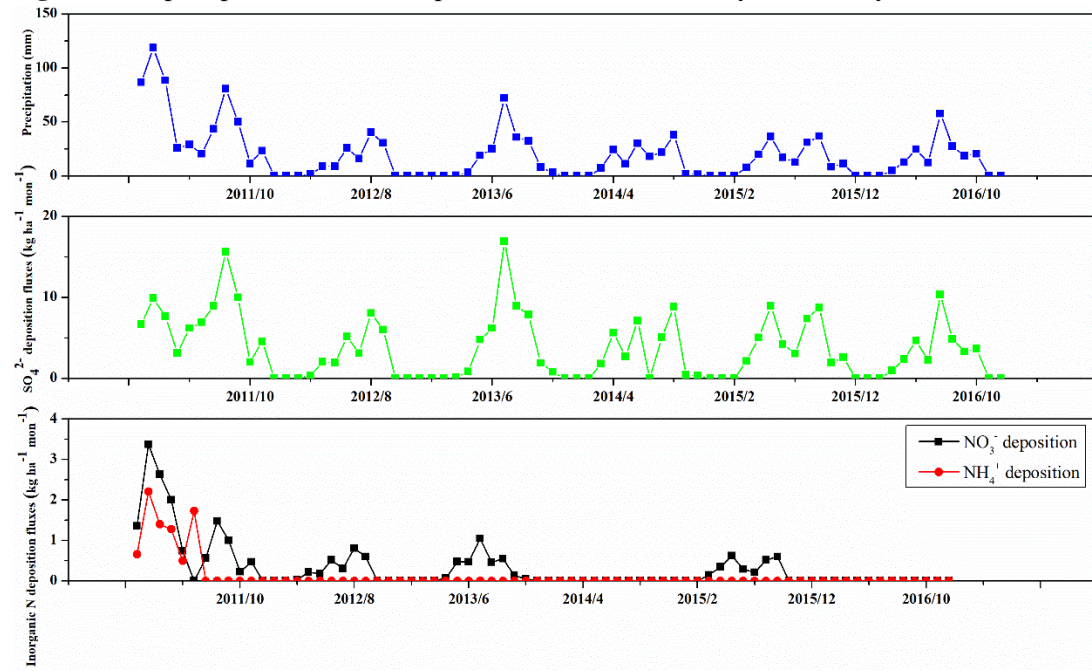

**Fig. S35** The precipitation and wet deposition fluxes of secondary ions in Guangyuan

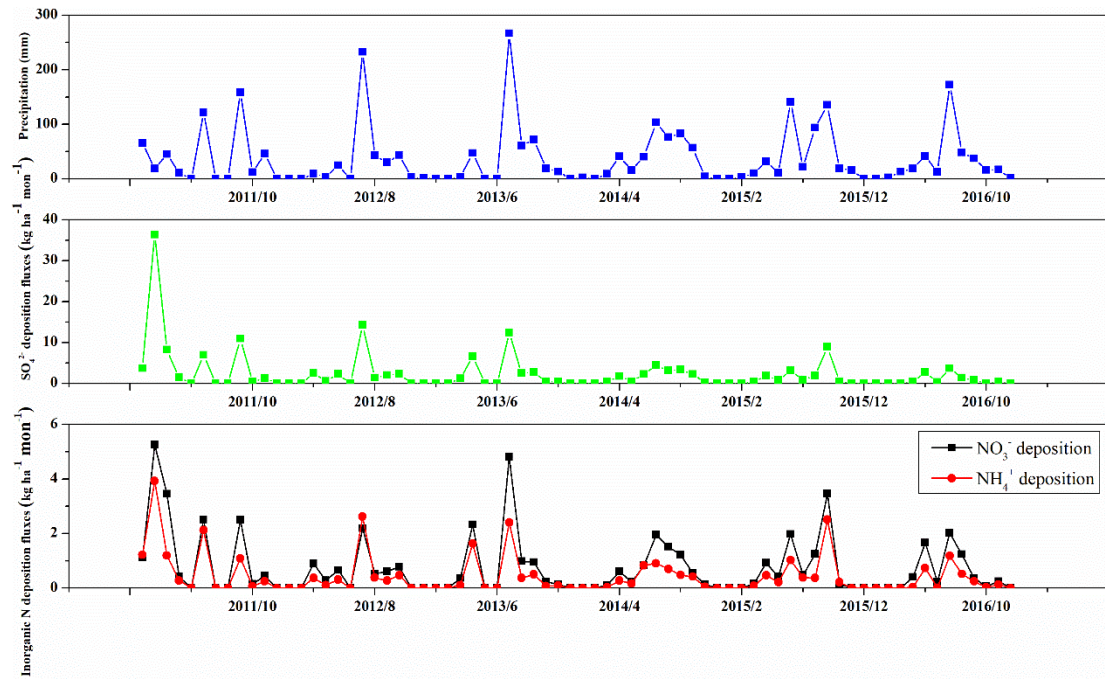

**Fig. S36** The precipitation and wet deposition fluxes of secondary ions in Guangzhou

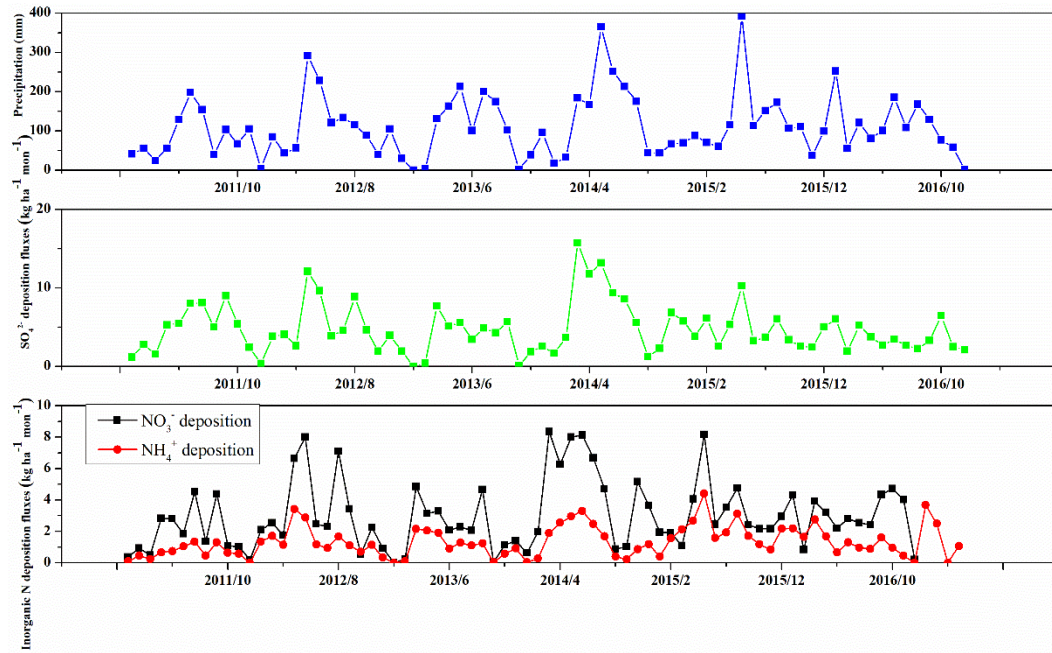

**Fig. S37** The precipitation and wet deposition fluxes of secondary ions in Harbin

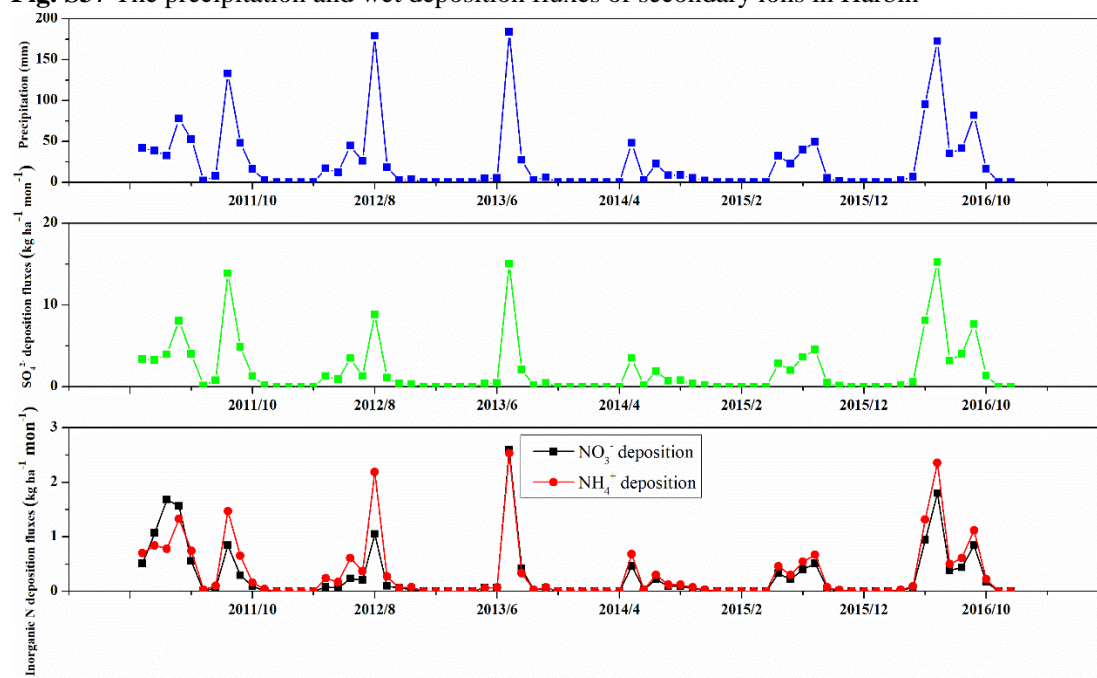



**Fig. S38** The precipitation and wet deposition fluxes of secondary ions in Haikou

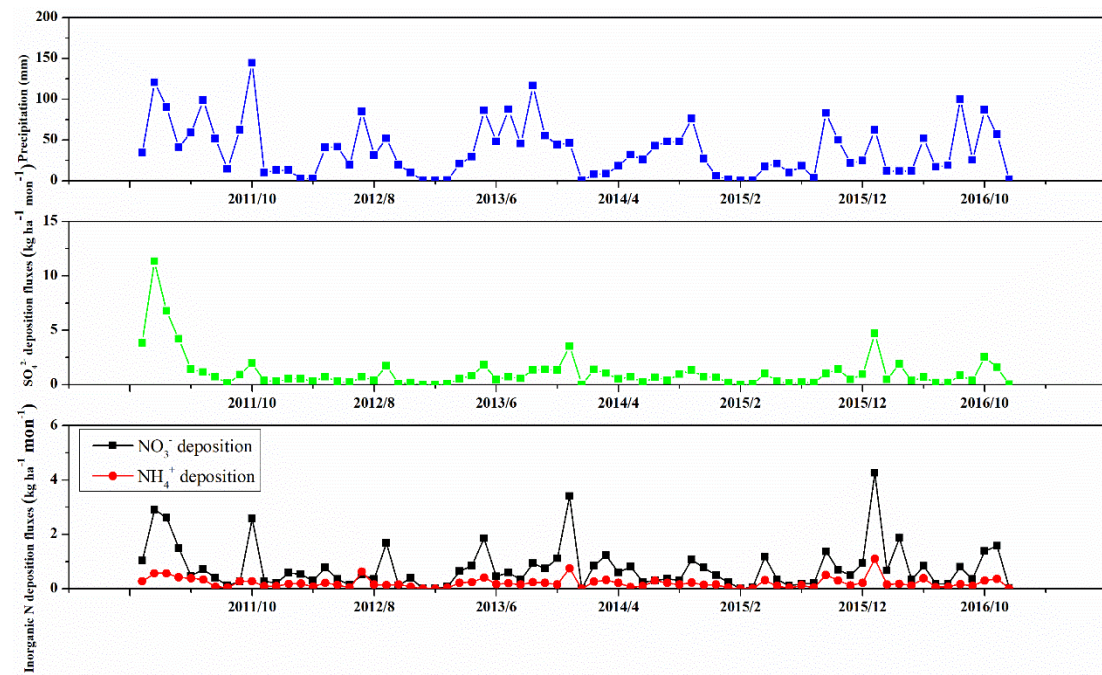

**Fig. S39** The precipitation and wet deposition fluxes of secondary ions in Hefei

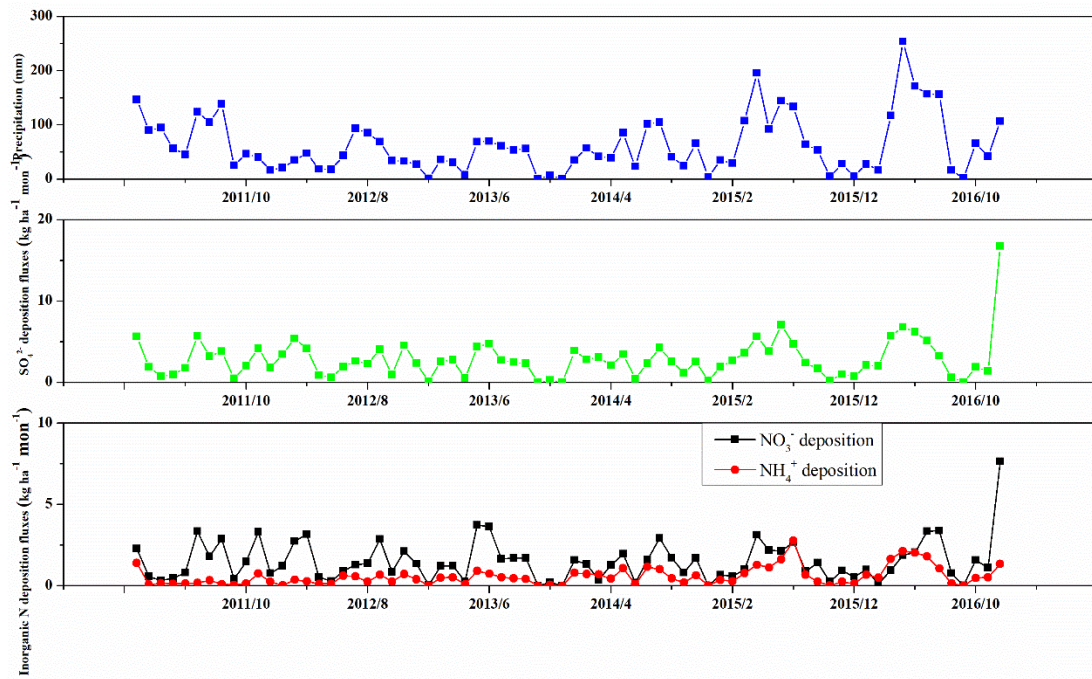

**Fig. S40** The precipitation and wet deposition fluxes of secondary ions in Heze

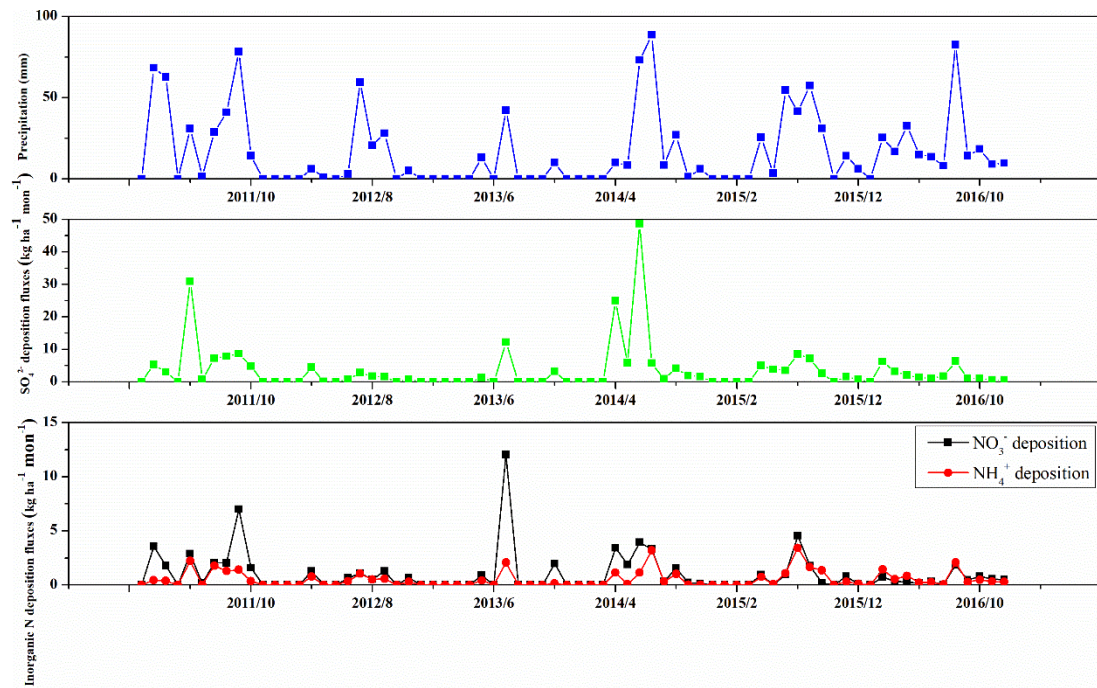

**Fig. S41** The precipitation and wet deposition fluxes of secondary ions in Hengshui

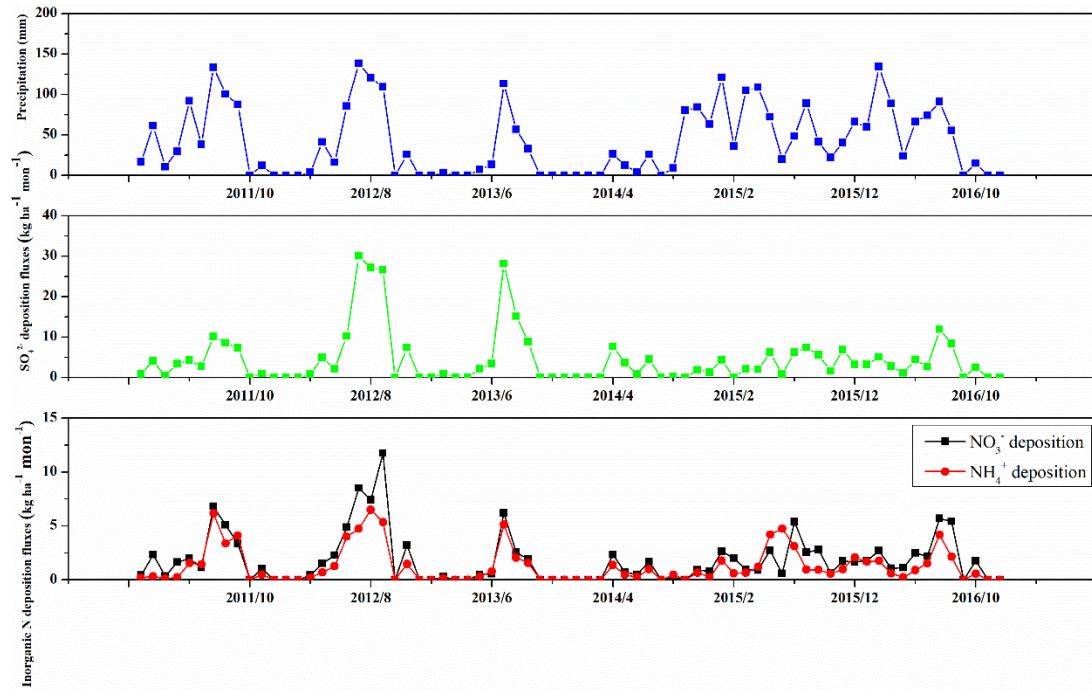

**Fig. S42** The precipitation and wet deposition fluxes of secondary ions in Hohehot

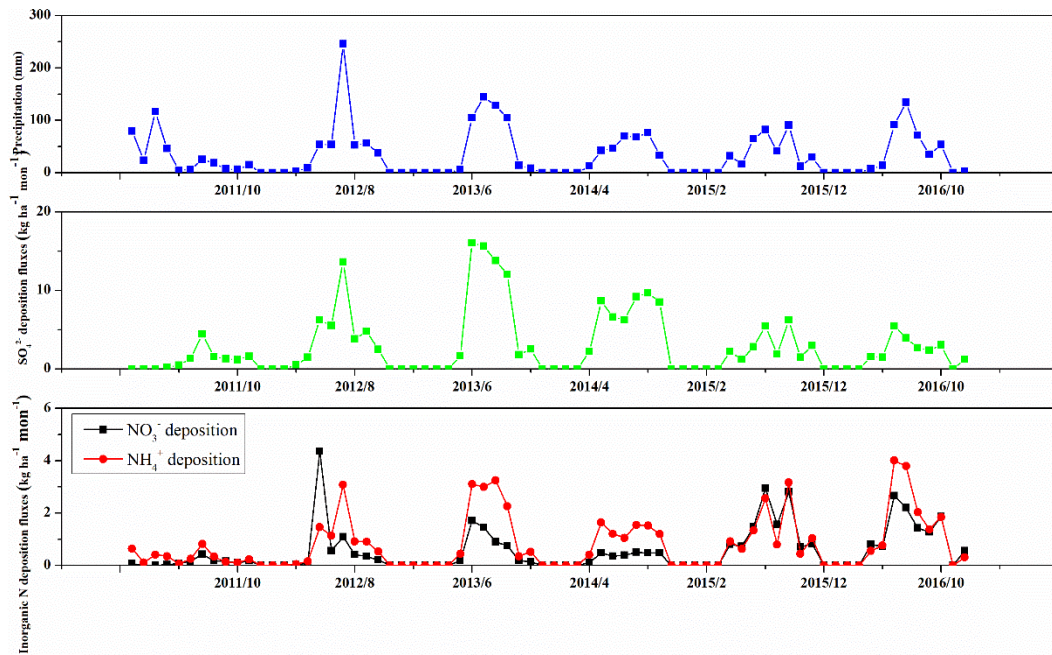

**Fig. S43** The precipitation and wet deposition fluxes of secondary ions in Huaian

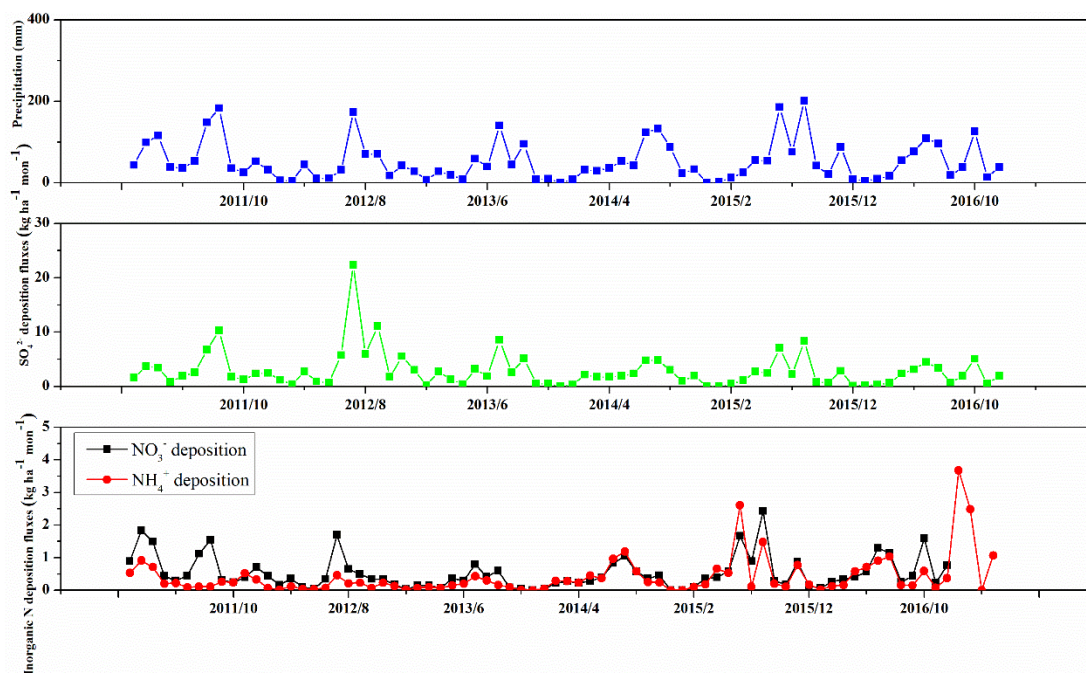

**Fig. S44** The precipitation and wet deposition fluxes of secondary ions in Huangshan

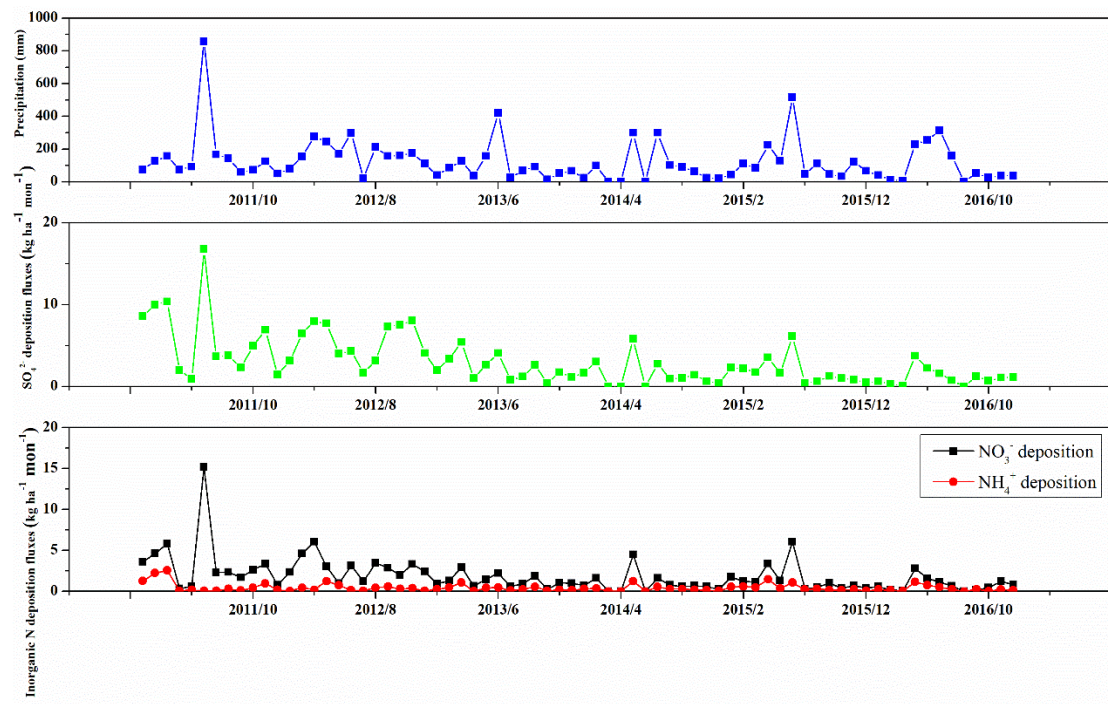

**Fig. S45** The precipitation and wet deposition fluxes of secondary ions in Huizhou

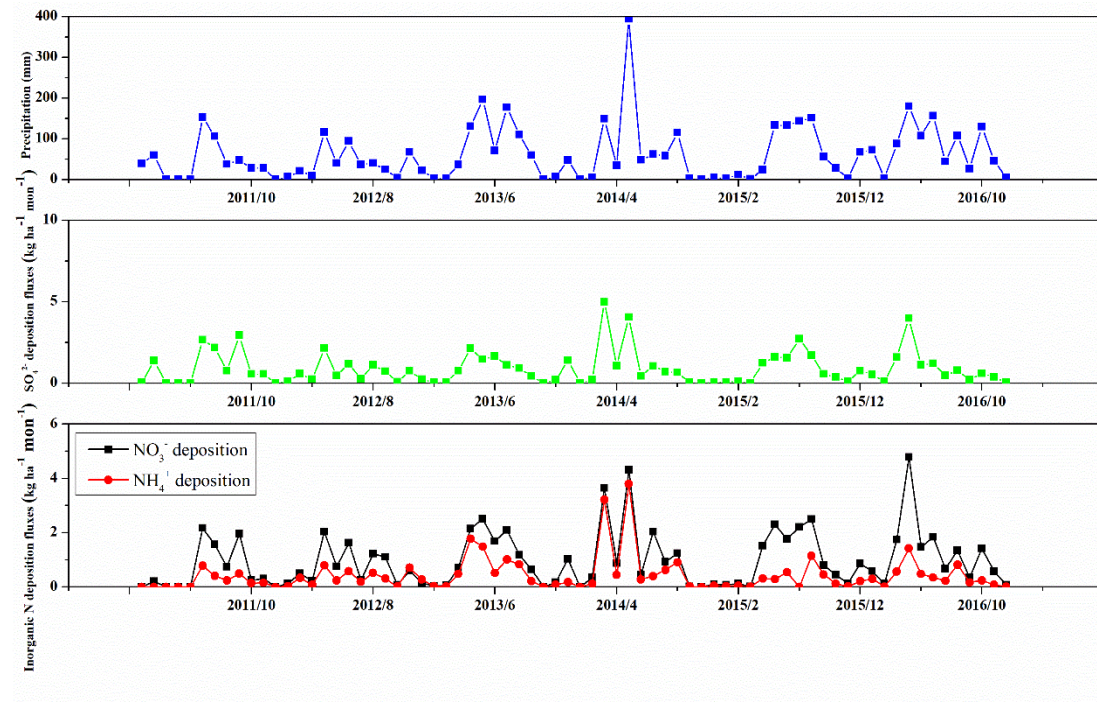



**Fig. S46** The precipitation and wet deposition fluxes of secondary ions in Jixi

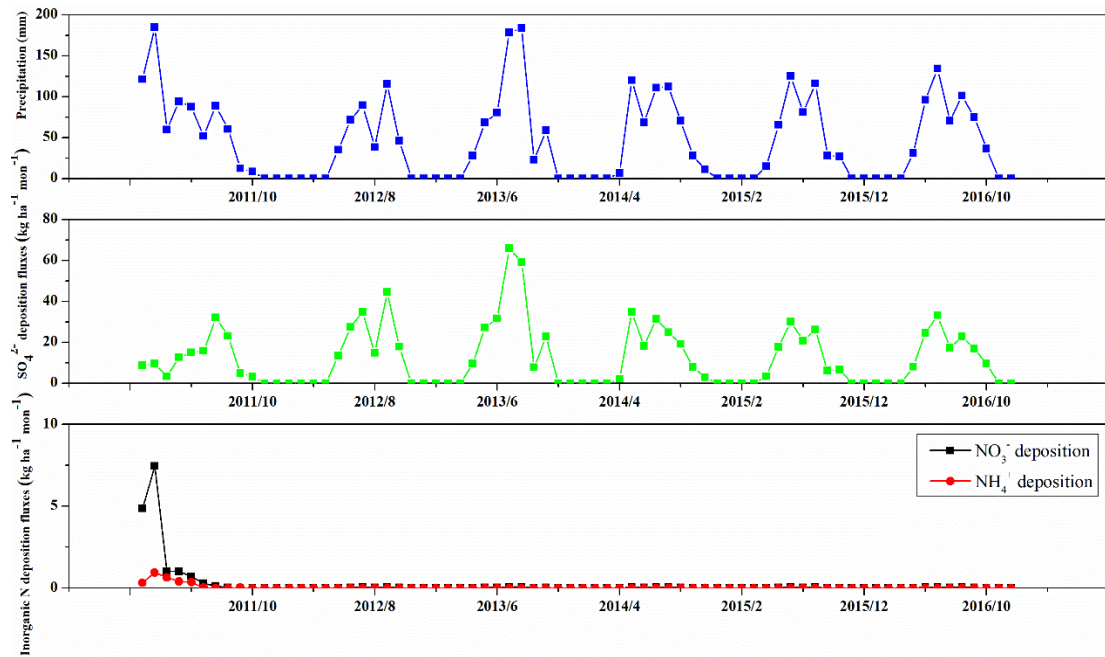

**Fig. S47** The precipitation and wet deposition fluxes of secondary ions in Ji'an

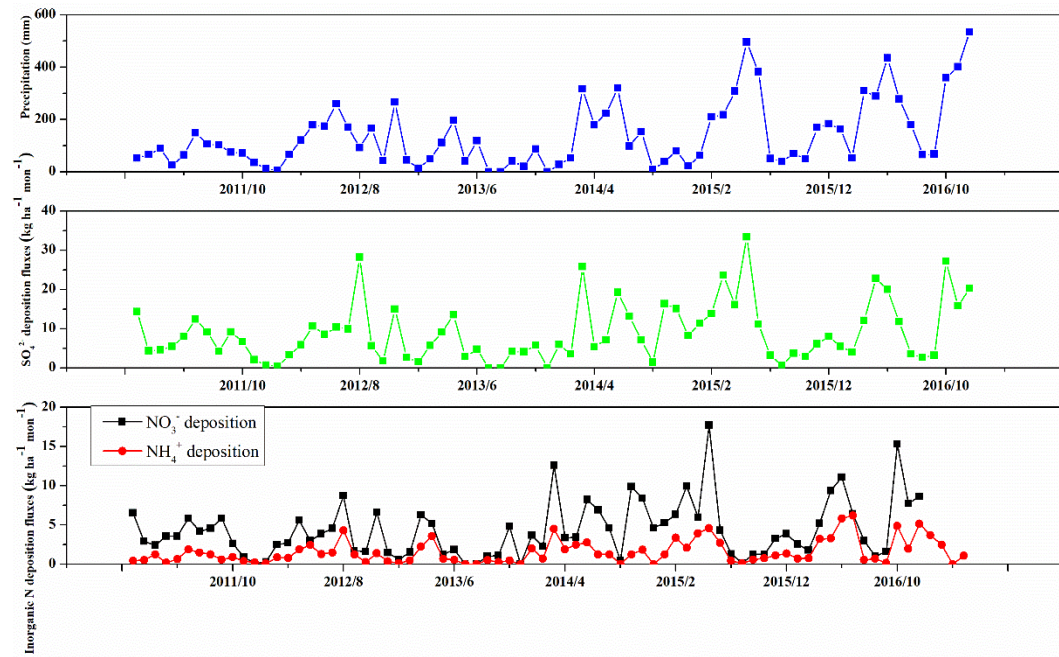

**Fig. S48** The precipitation and wet deposition fluxes of secondary ions in Jilin

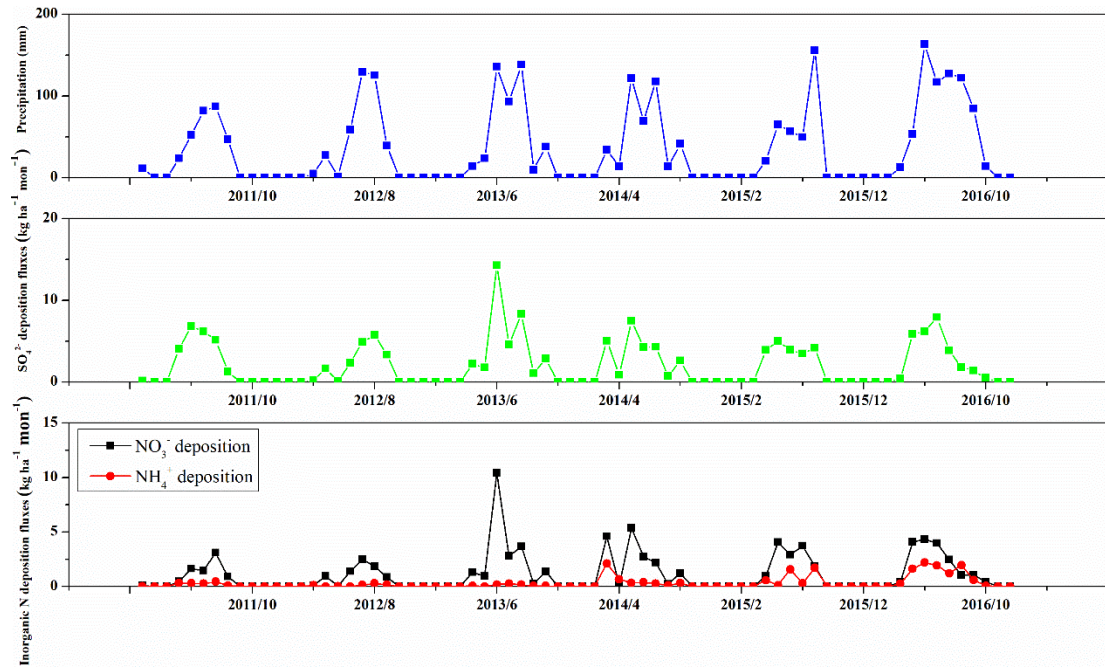

**Fig. S49** The precipitation and wet deposition fluxes of secondary ions in Jining

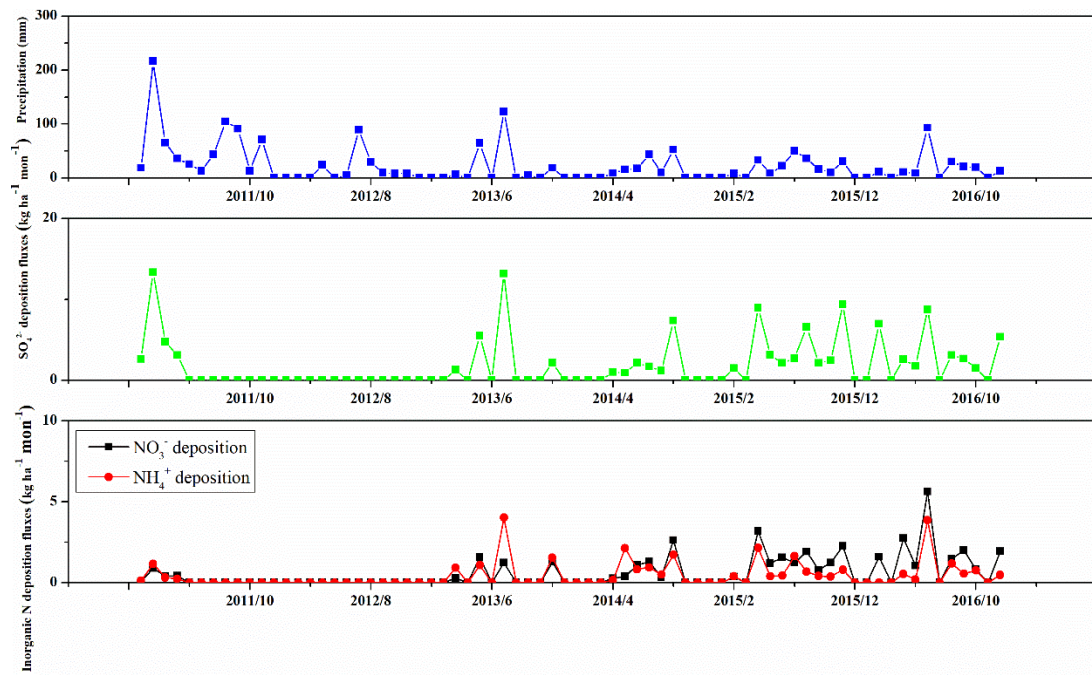

**Fig. S50** The precipitation and wet deposition fluxes of secondary ions in Jiamusi

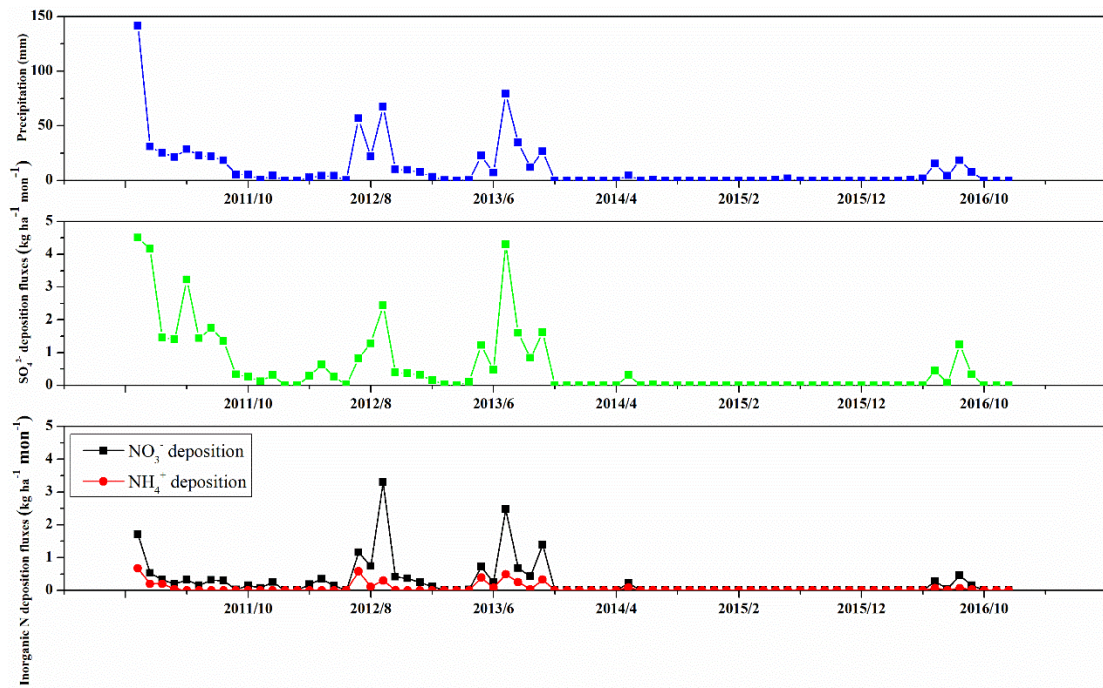

**Fig. S51** The precipitation and wet deposition fluxes of secondary ions in Jiaozuo

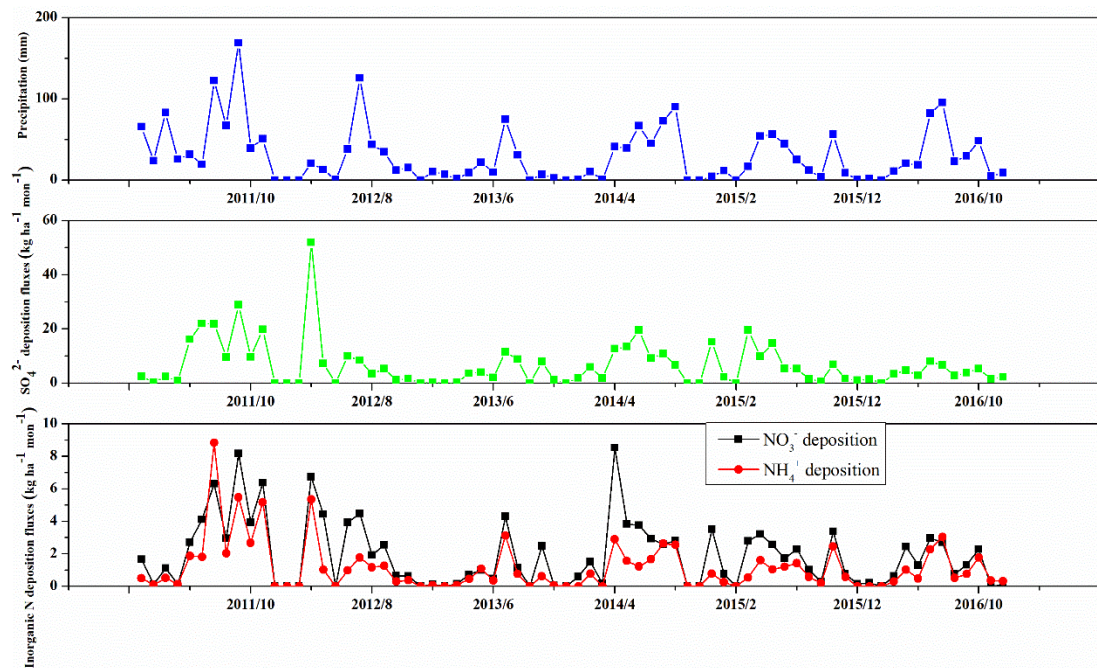

**Fig. S52** The precipitation and wet deposition fluxes of secondary ions in Jinzhou

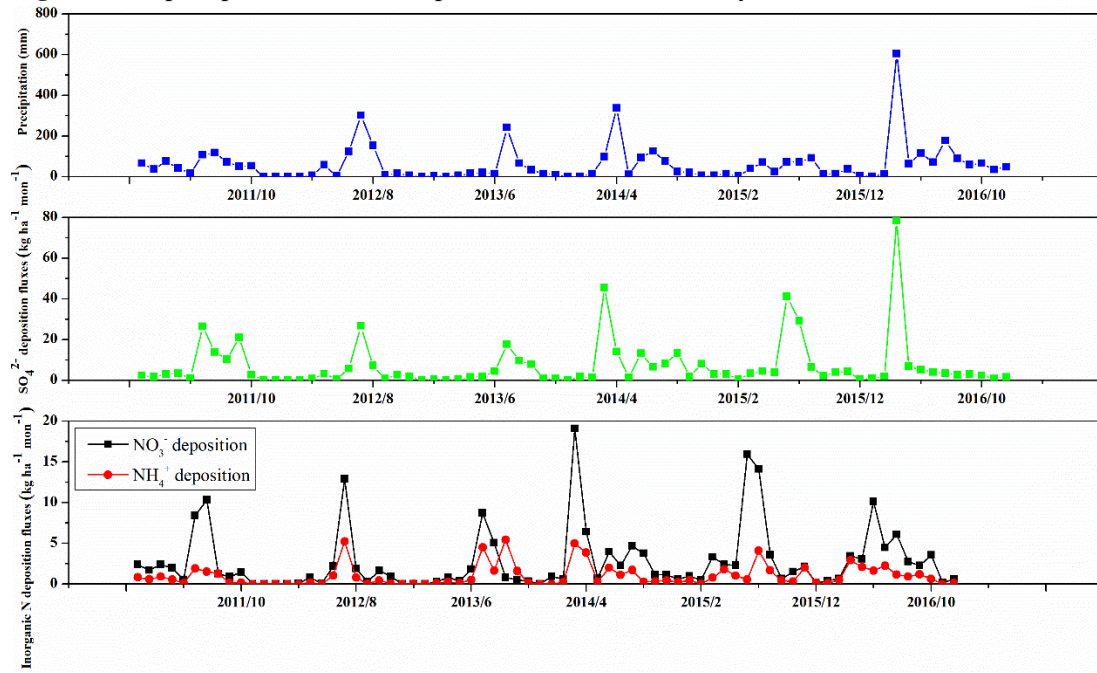

**Fig. S53** The precipitation and wet deposition fluxes of secondary ions in Jingdezhen

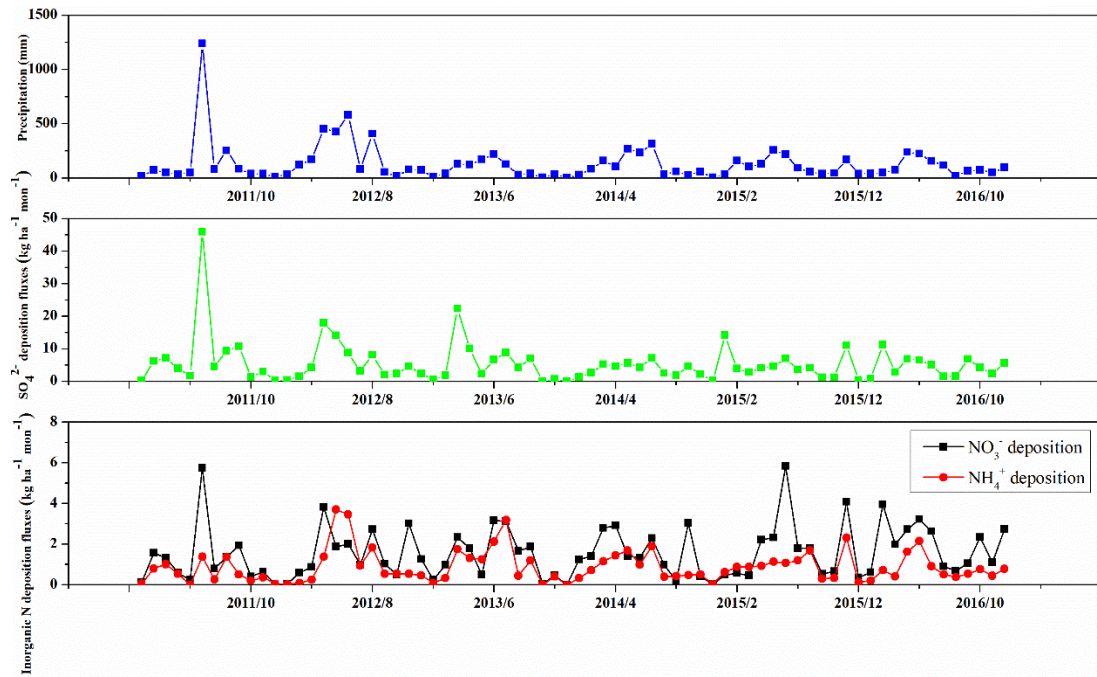



**Fig. S54** The precipitation and wet deposition fluxes of secondary ions in Jiujiang

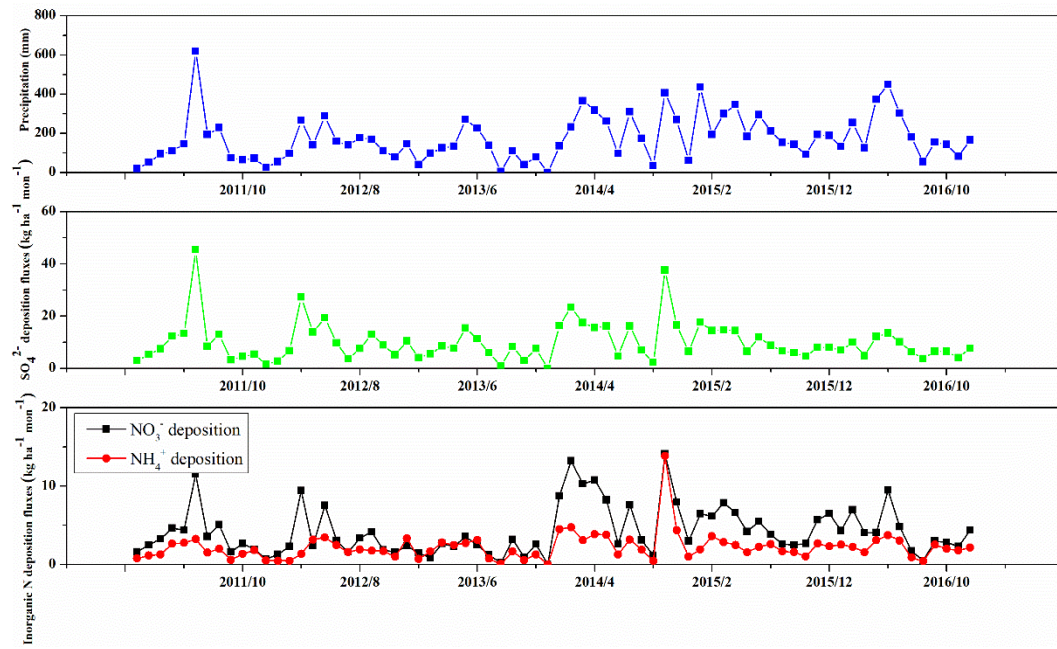

**Fig. S55** The precipitation and wet deposition fluxes of secondary ions in Kaifeng

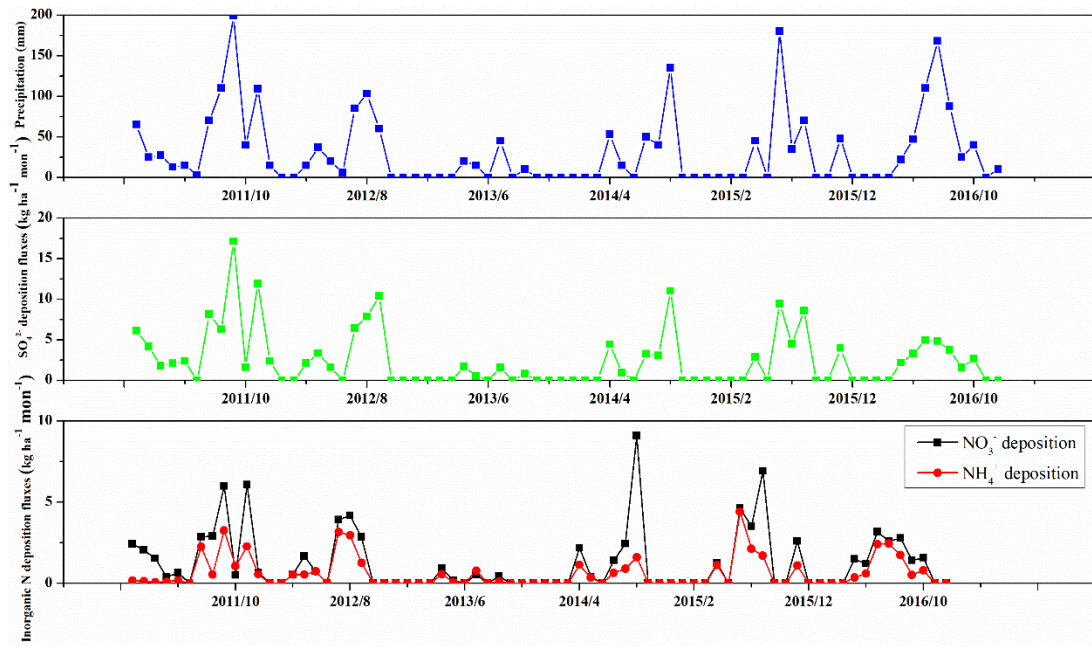

**Fig. S56** The precipitation and wet deposition fluxes of secondary ions in Lijiang

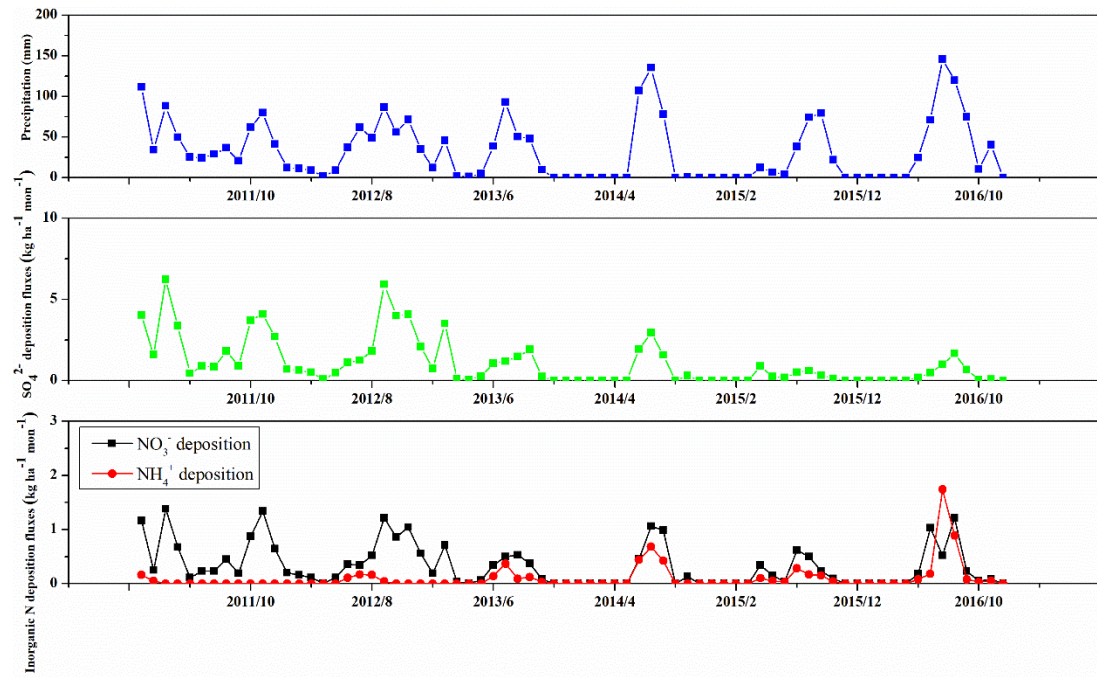

**Fig. S57** The precipitation and wet deposition fluxes of secondary ions in Lianyungang

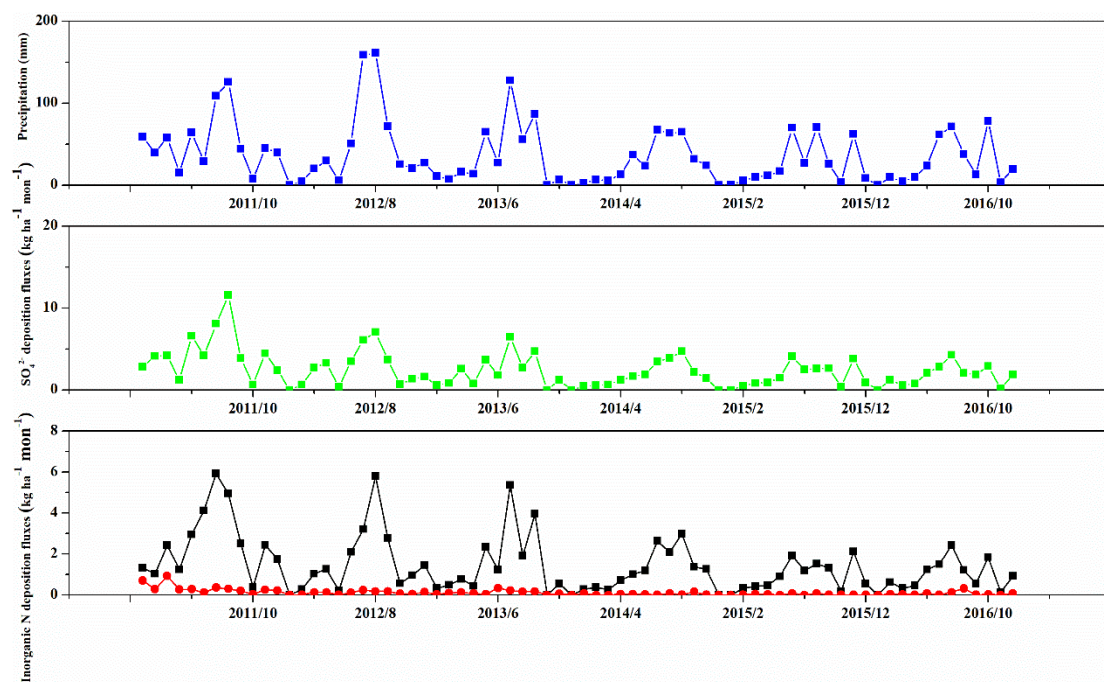

**Fig. S58** The precipitation and wet deposition fluxes of secondary ions in Liangshan

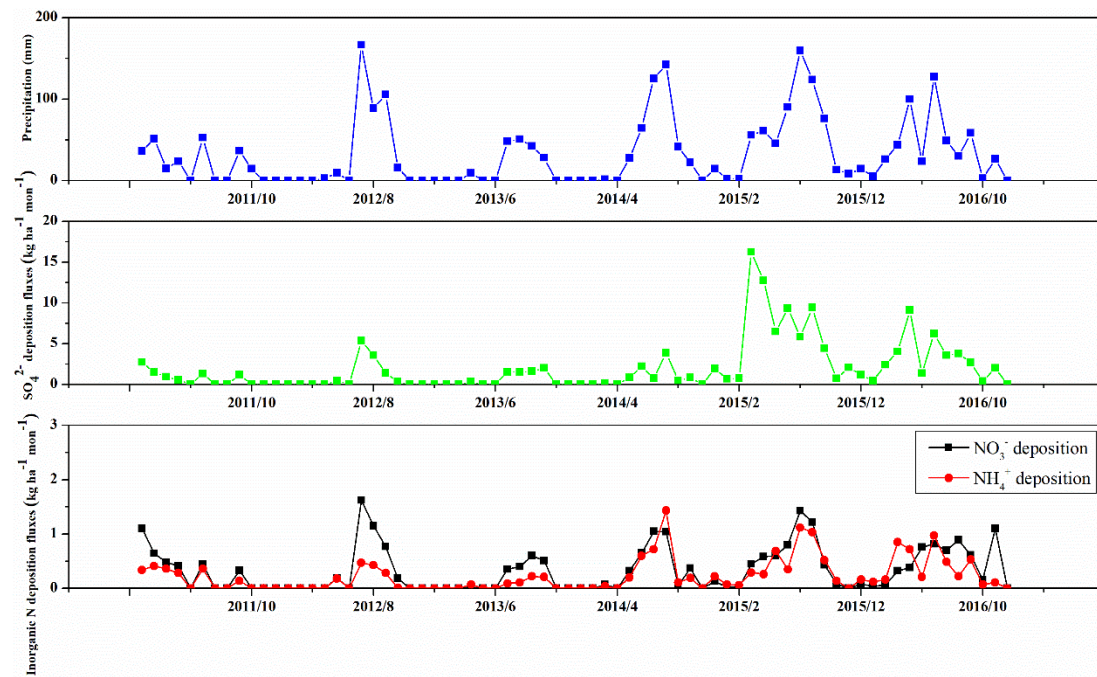

**Fig. S59** The precipitation and wet deposition fluxes of secondary ions in Liaoyuan

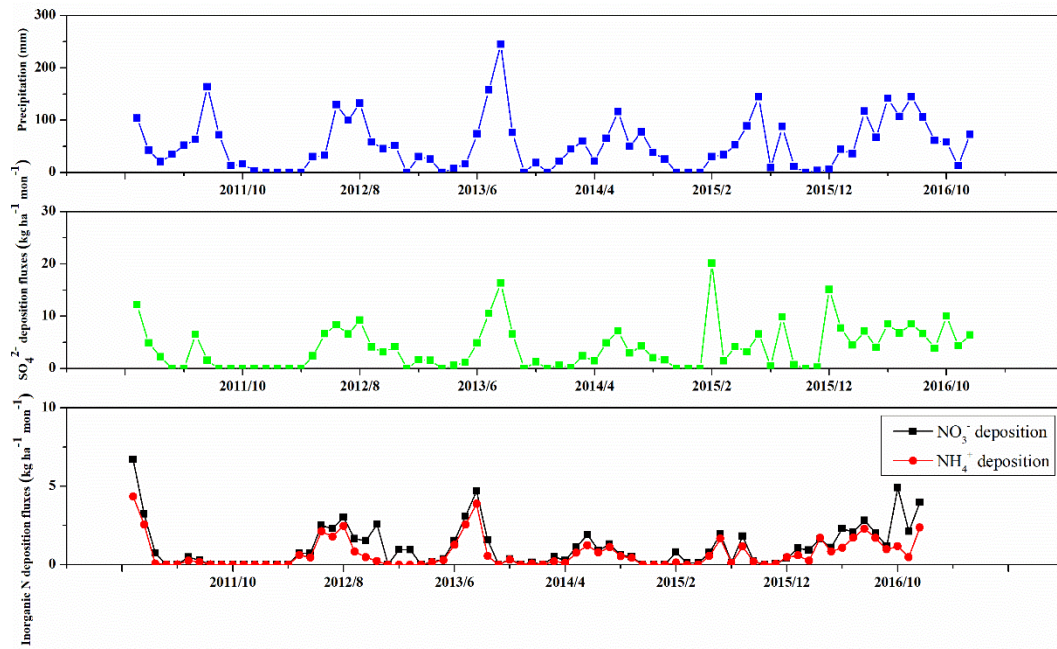

**Fig. S60** The precipitation and wet deposition fluxes of secondary ions in Liaocheng

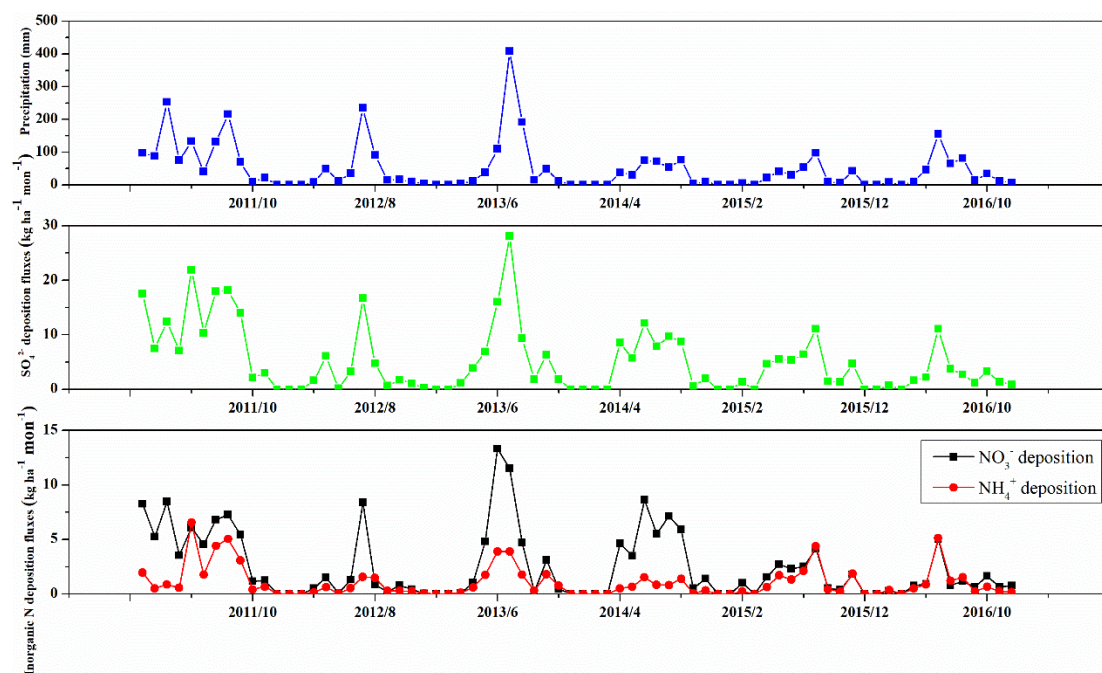

**Fig. S61** The precipitation and wet deposition fluxes of secondary ions in Linyi

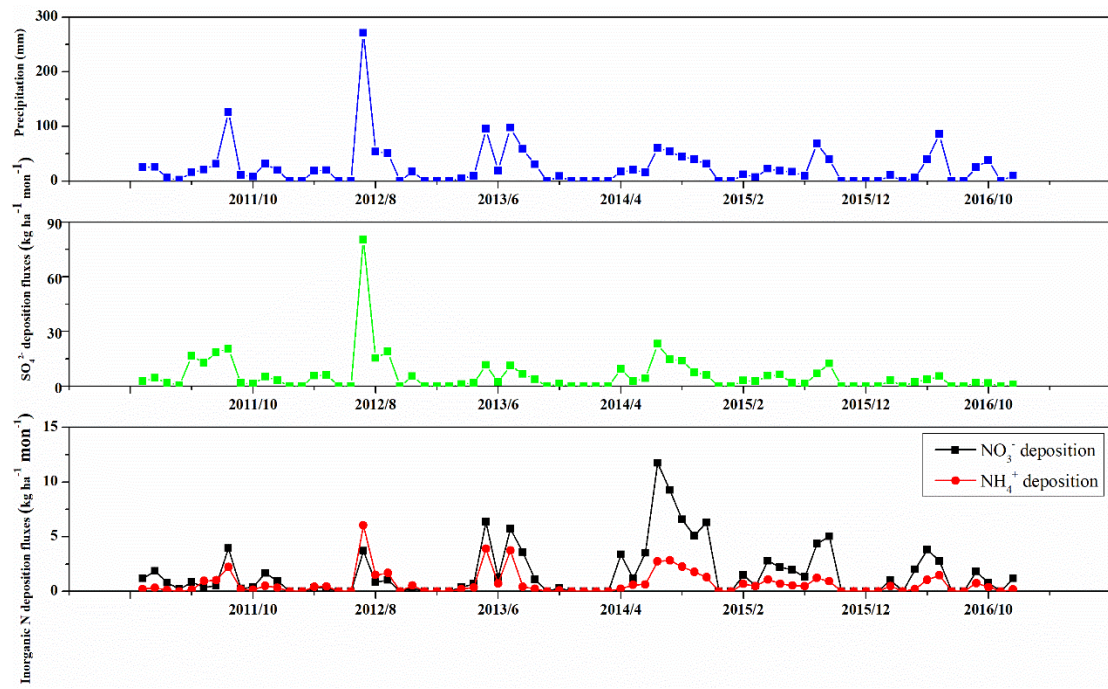



**Fig. S62** The precipitation and wet deposition fluxes of secondary ions in Lu'an

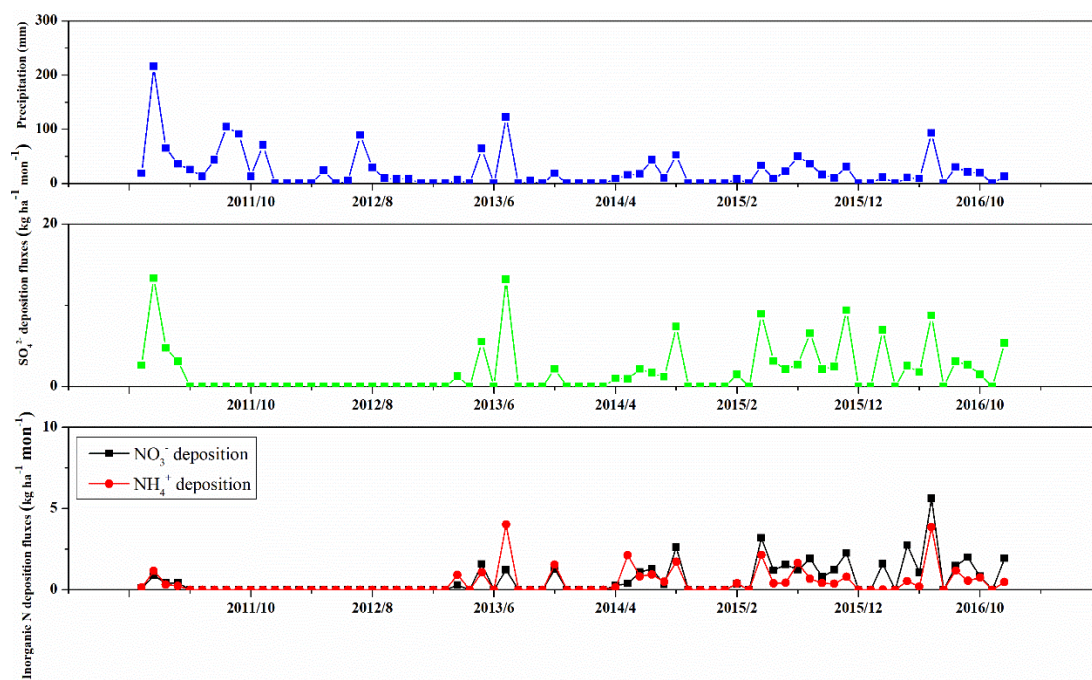

**Fig. S63** The precipitation and wet deposition fluxes of secondary ions in Luzhou

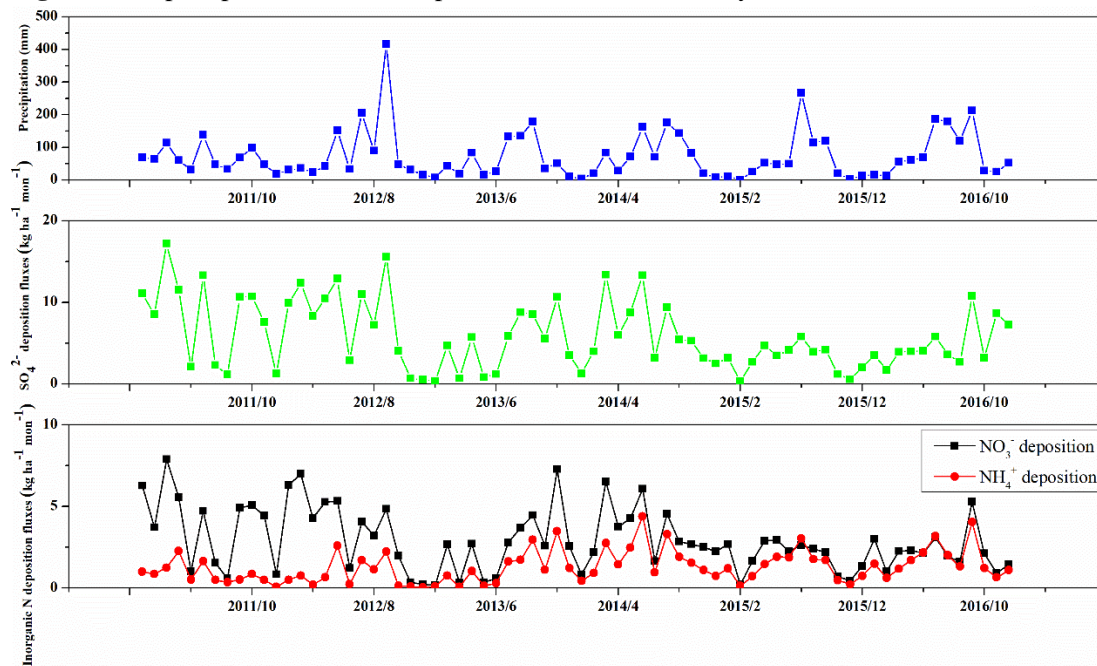

**Fig. S64** The precipitation and wet deposition fluxes of secondary ions in Lvliang

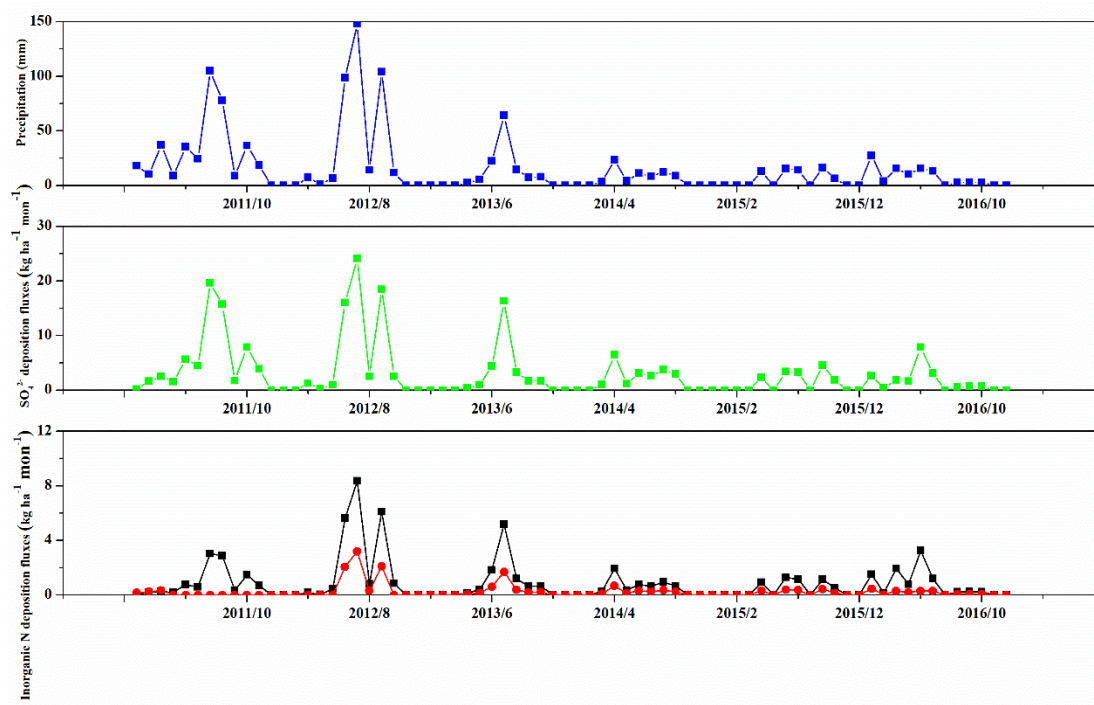

**Fig. S65** The precipitation and wet deposition fluxes of secondary ions in Mudanjiang

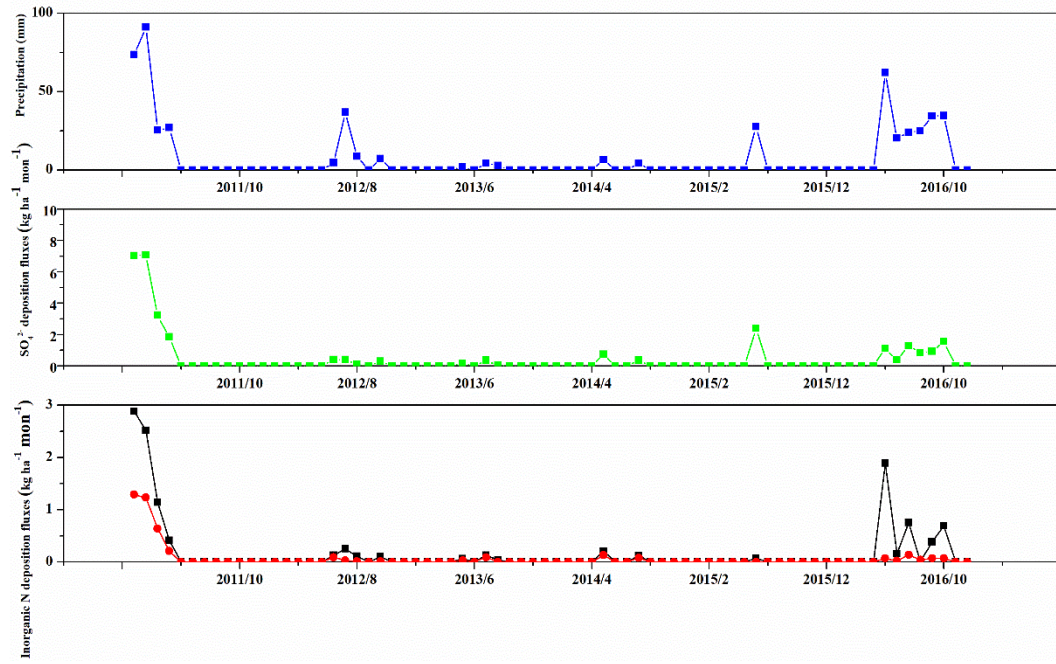

**Fig. S66** The precipitation and wet deposition fluxes of secondary ions in Nanjing

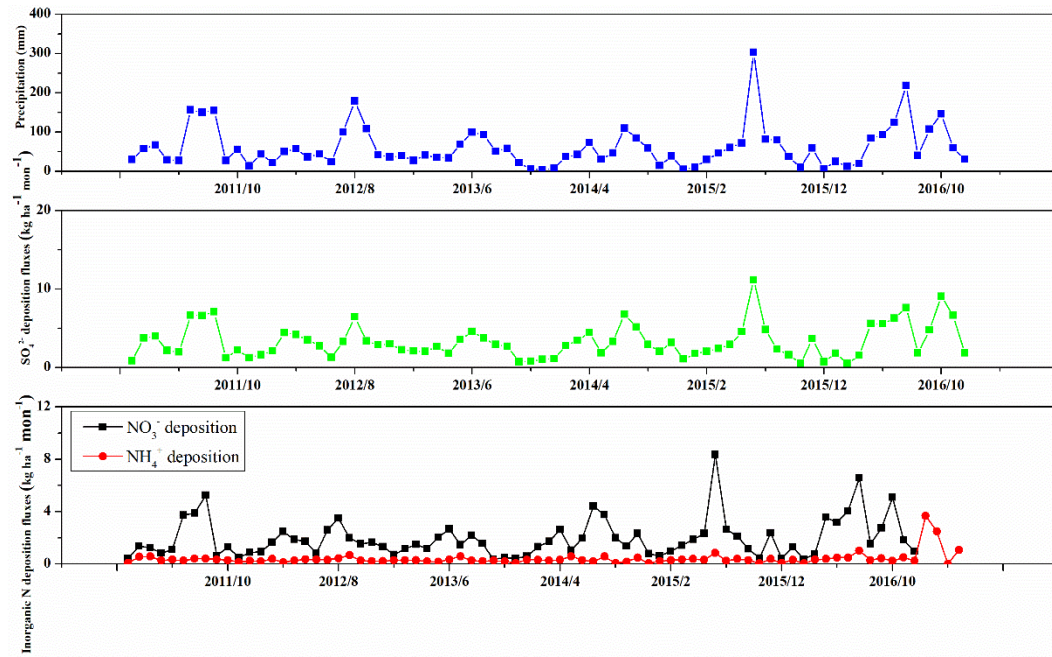

**Fig. S67** The precipitation and wet deposition fluxes of secondary ions in Nantong

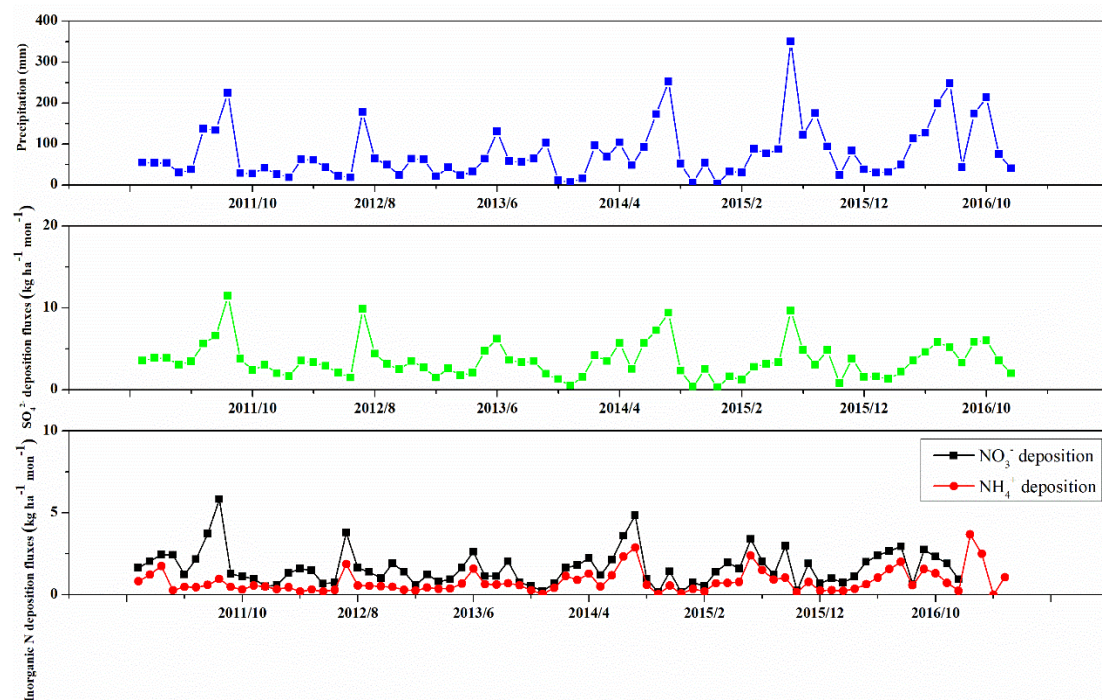

**Fig. S68** The precipitation and wet deposition fluxes of secondary ions in Nanyang

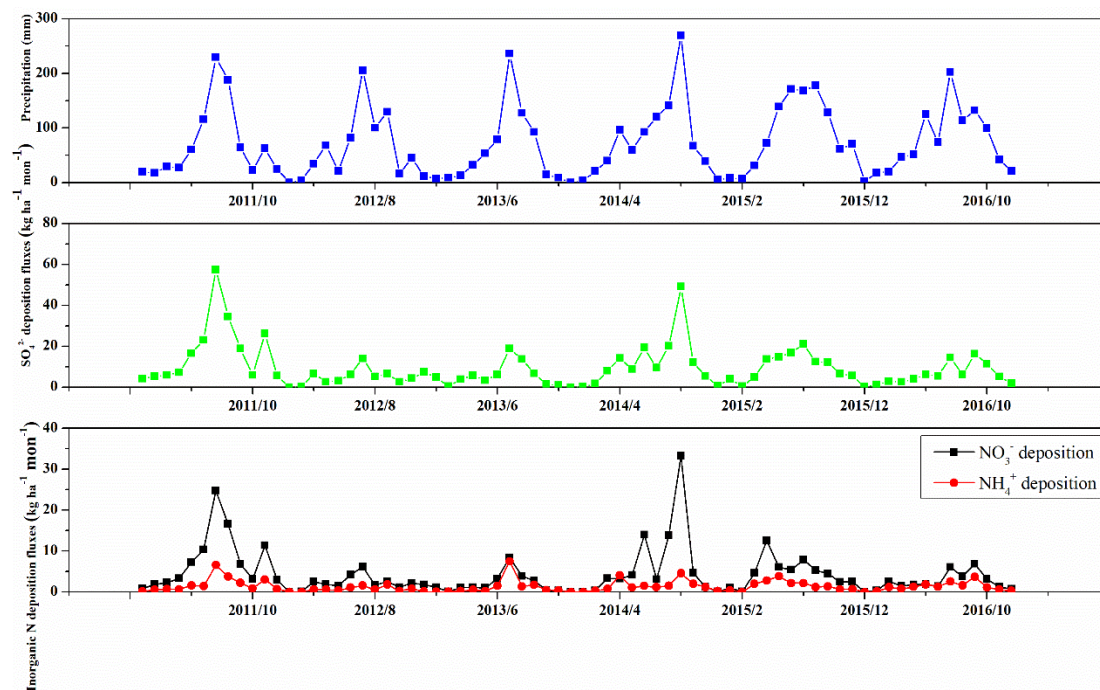

**Fig. S69** The precipitation and wet deposition fluxes of secondary ions in Panzhihua

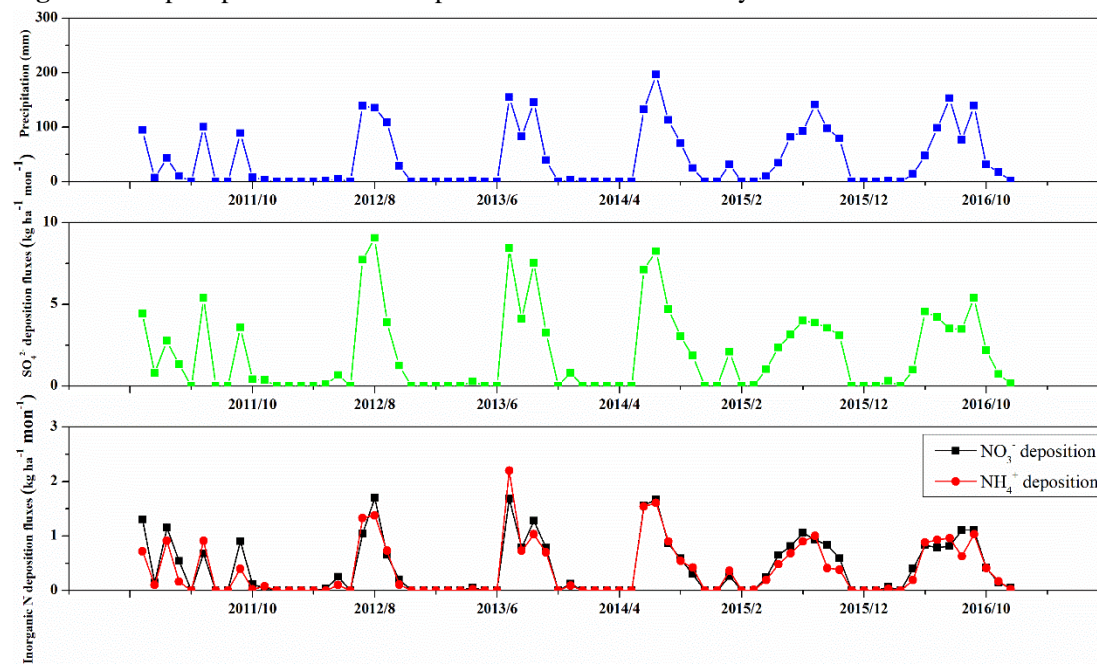



**Fig. S70** The precipitation and wet deposition fluxes of secondary ions in Pingdingshan

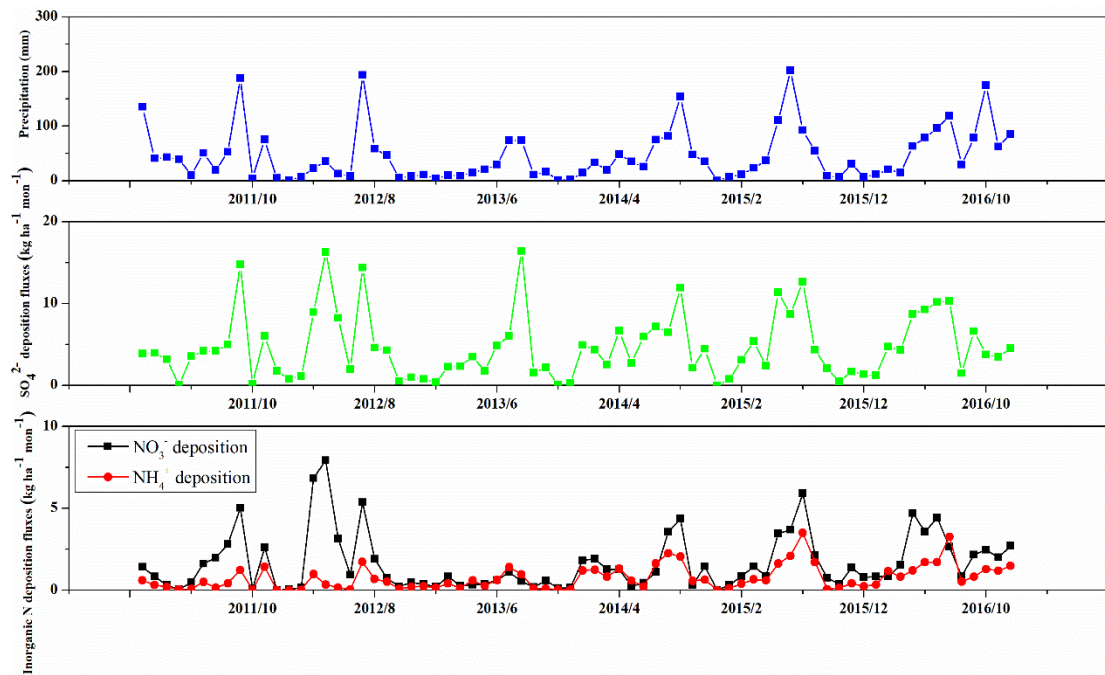

**Fig. S71** The precipitation and wet deposition fluxes of secondary ions in Pingxiang

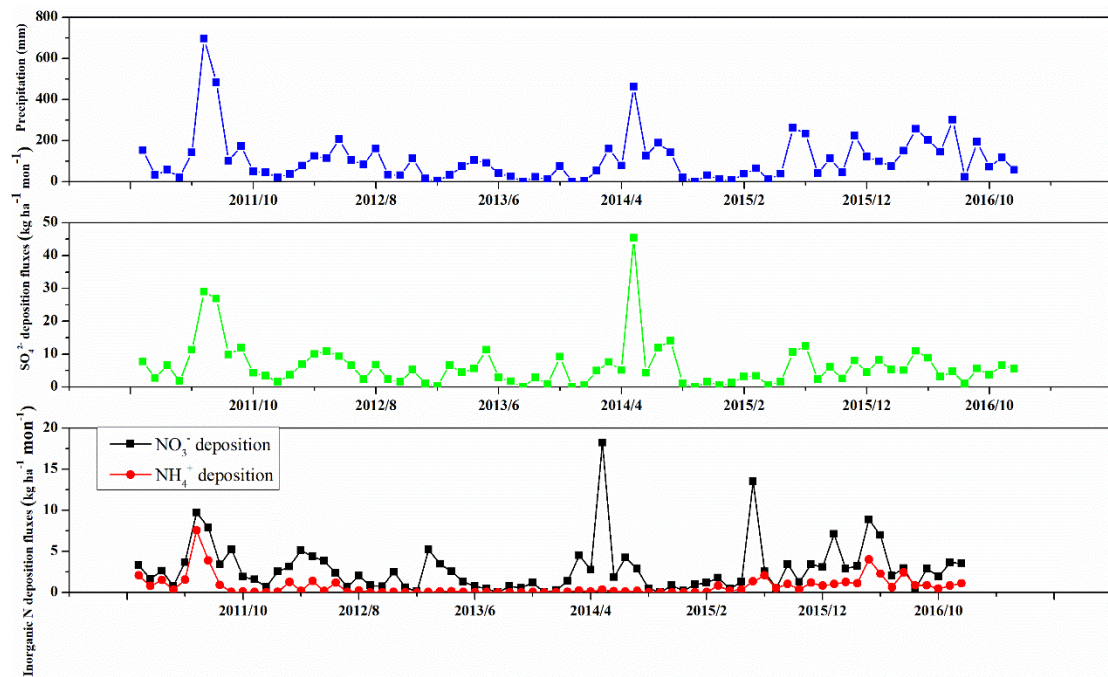

**Fig. S72** The precipitation and wet deposition fluxes of secondary ions in Qitaihe

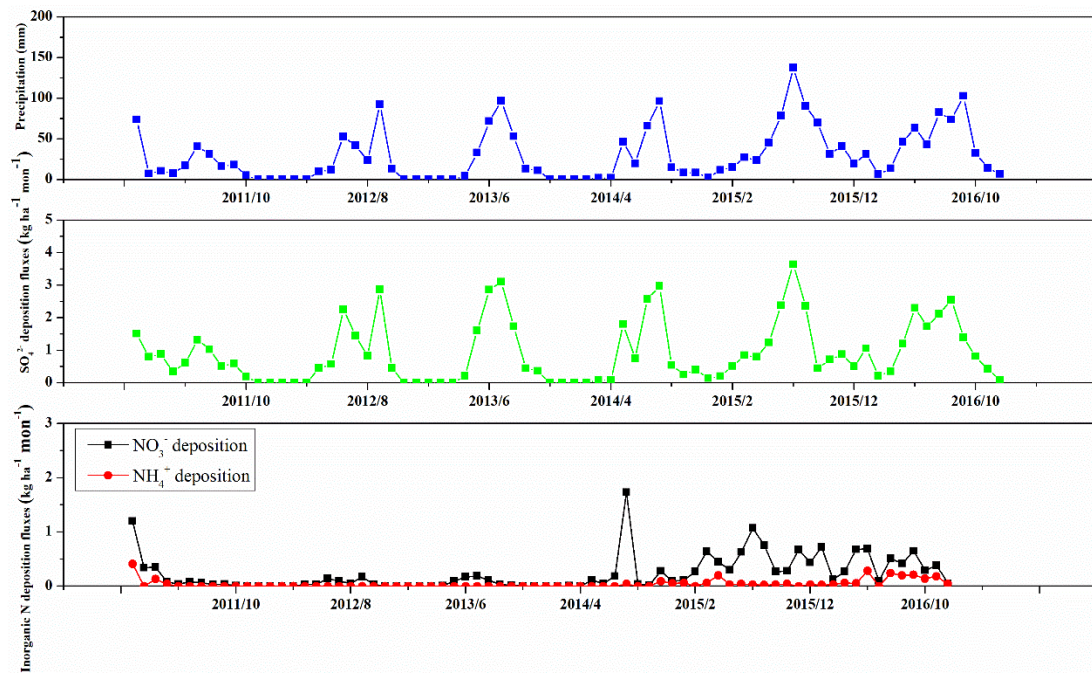

**Fig. S73** The precipitation and wet deposition fluxes of secondary ions in Qiqihaer

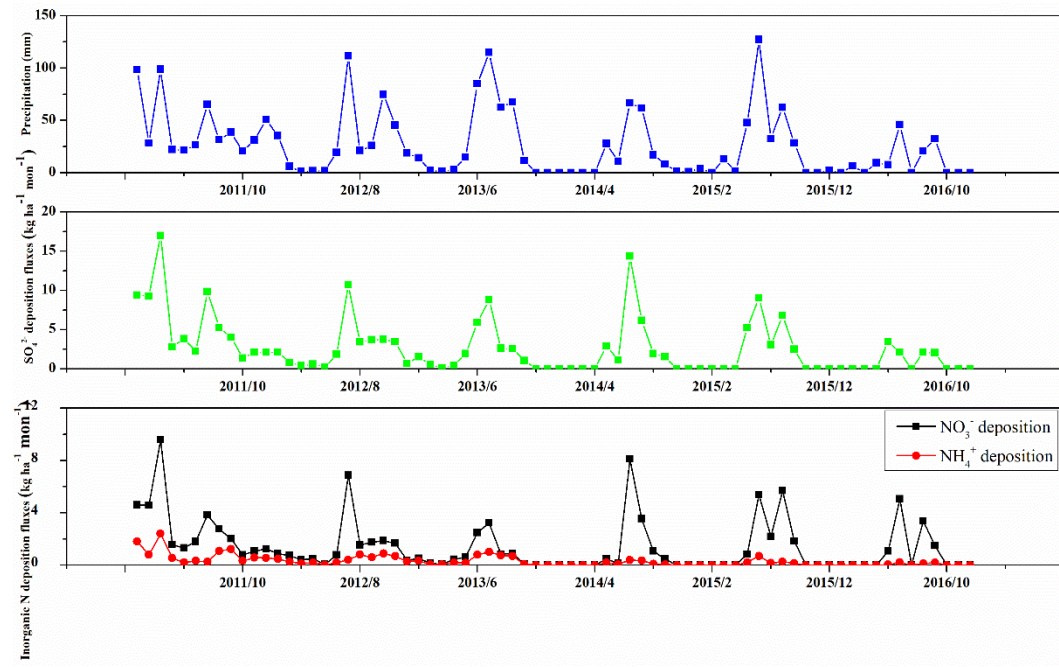

**Fig. S74** The precipitation and wet deposition fluxes of secondary ions in Shanghai

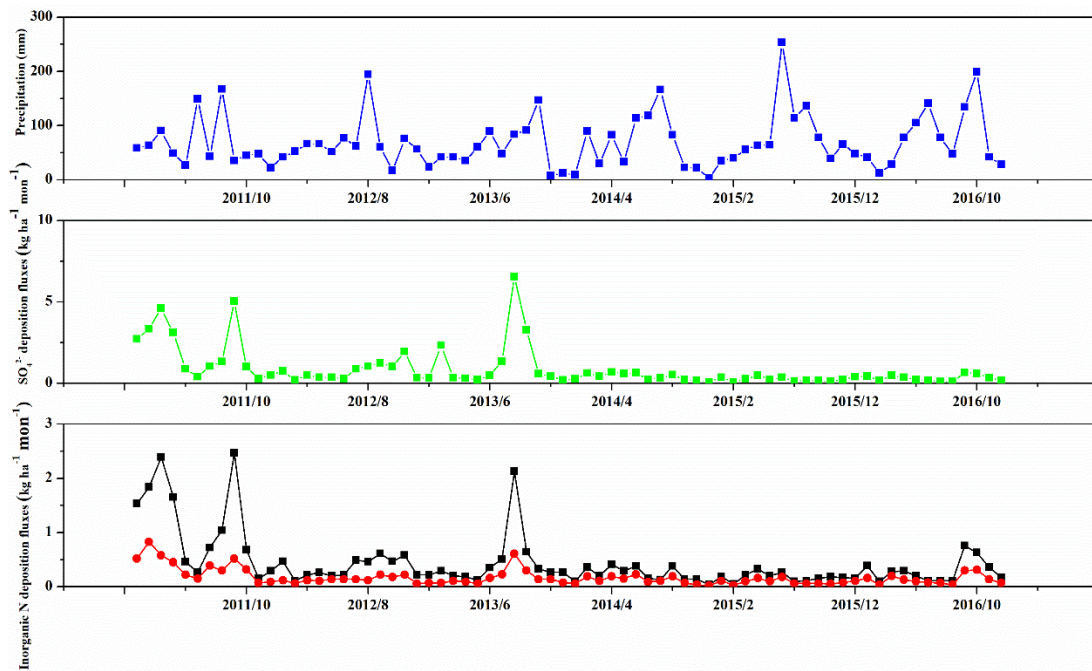

**Fig. S75** The precipitation and wet deposition fluxes of secondary ions in Shizuishan

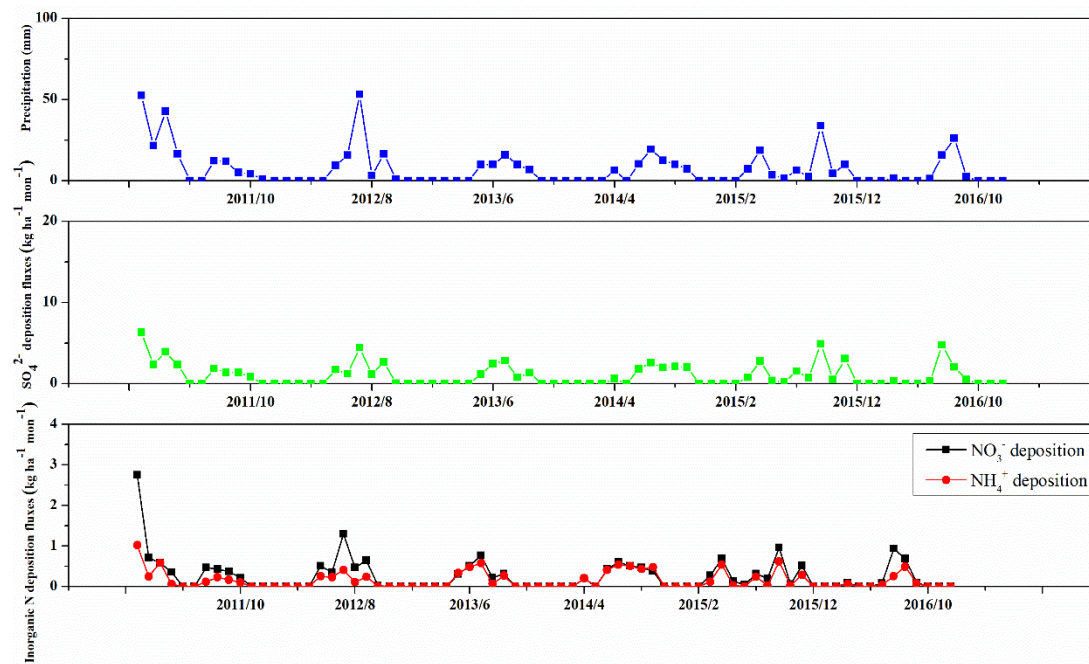

**Fig. S76** The precipitation and wet deposition fluxes of secondary ions in Shuozhou

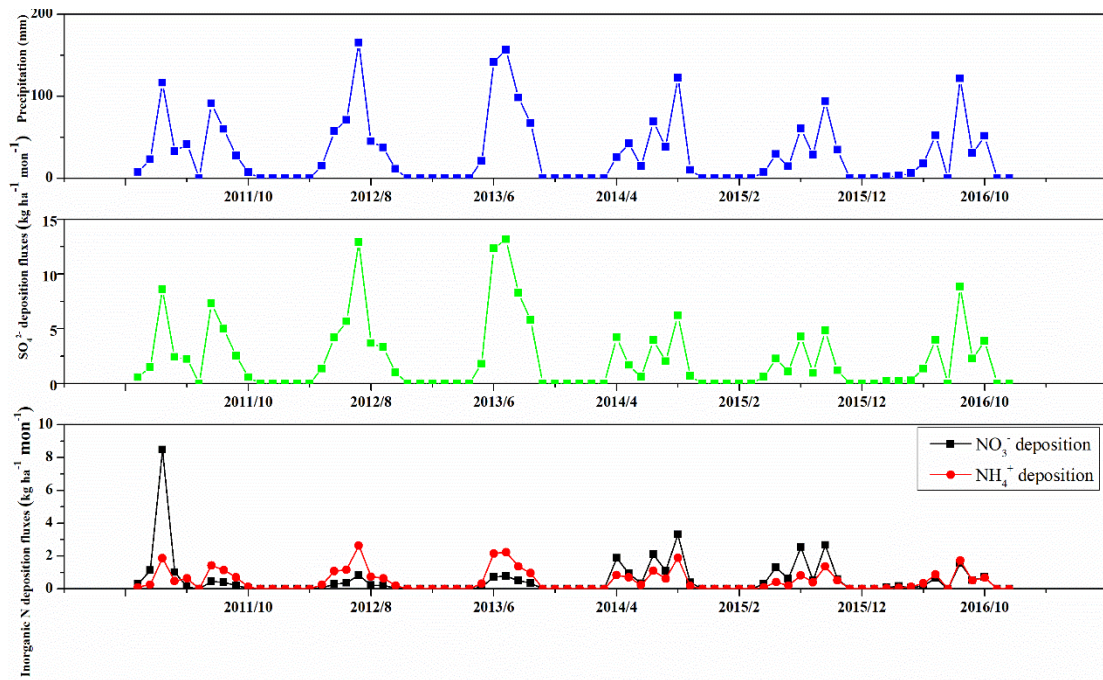

**Fig. S77** The precipitation and wet deposition fluxes of secondary ions in Siping

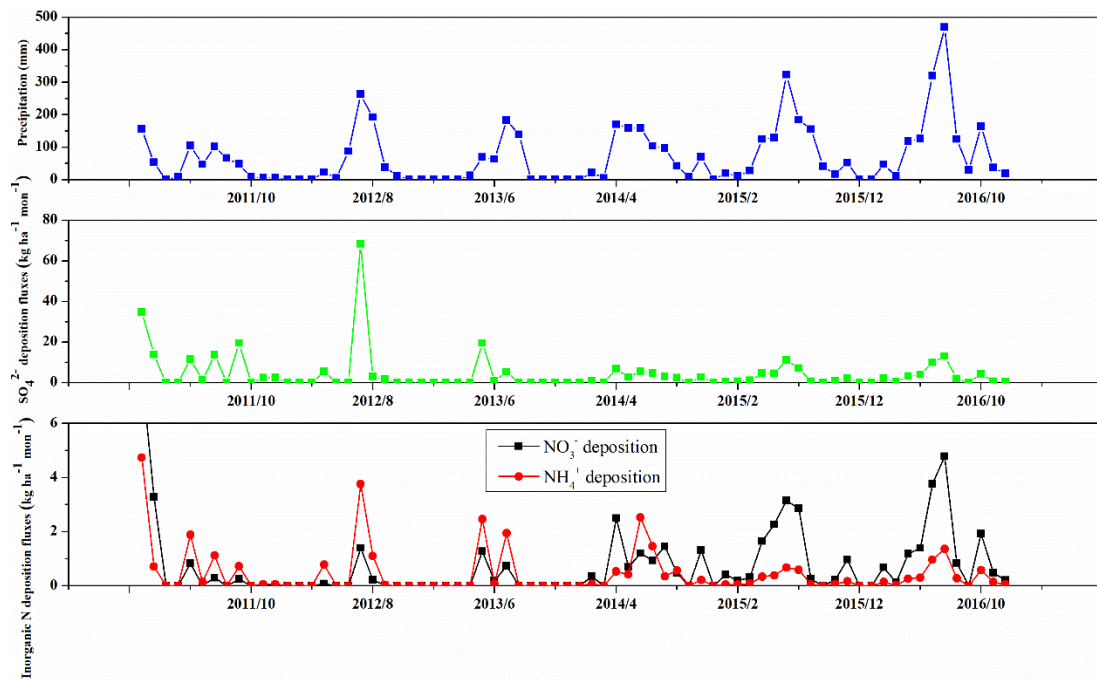



**Fig. S78** The precipitation and wet deposition fluxes of secondary ions in Songyuan

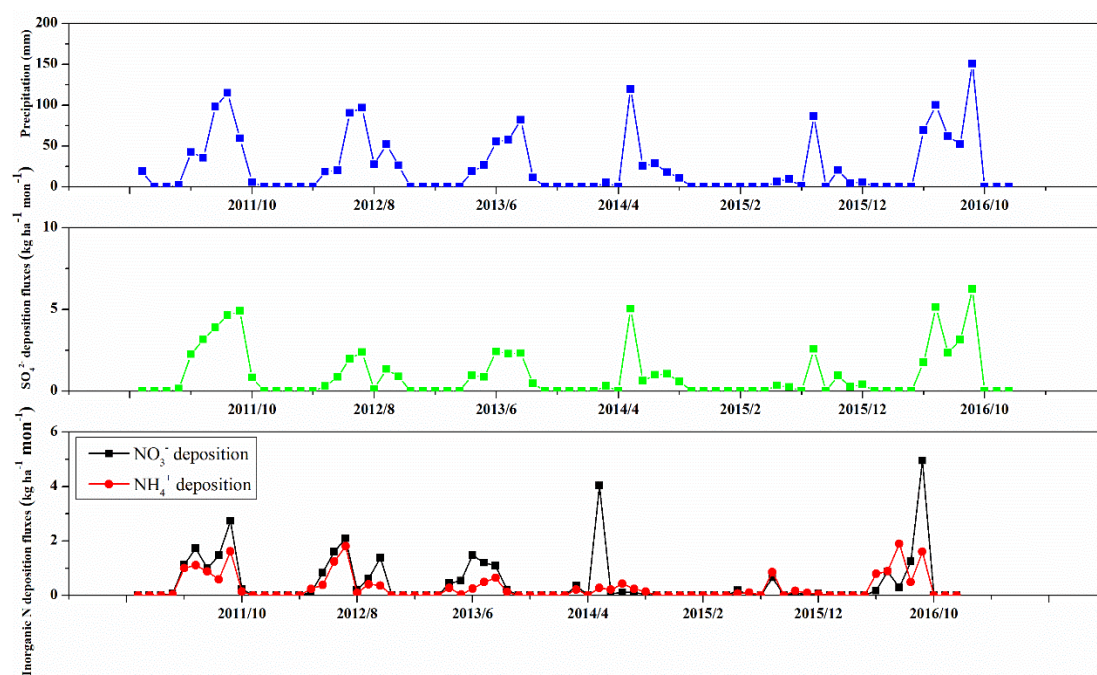

**Fig. S79** The precipitation and wet deposition fluxes of secondary ions in Tacheng

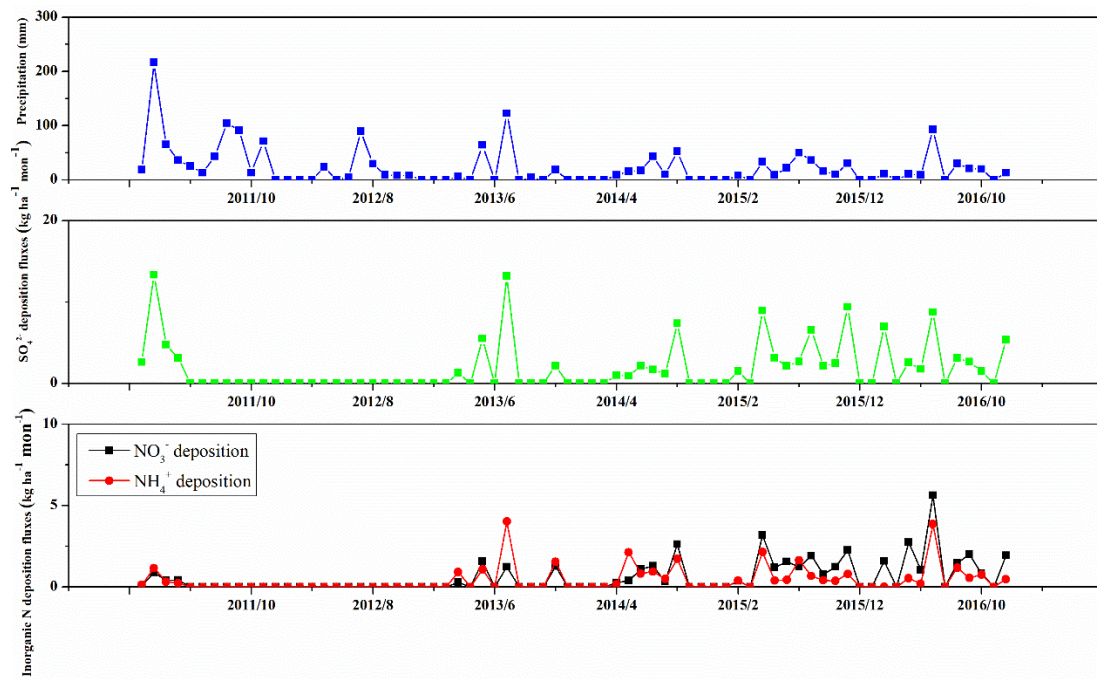

**Fig. S80** The precipitation and wet deposition fluxes of secondary ions in Tangshan

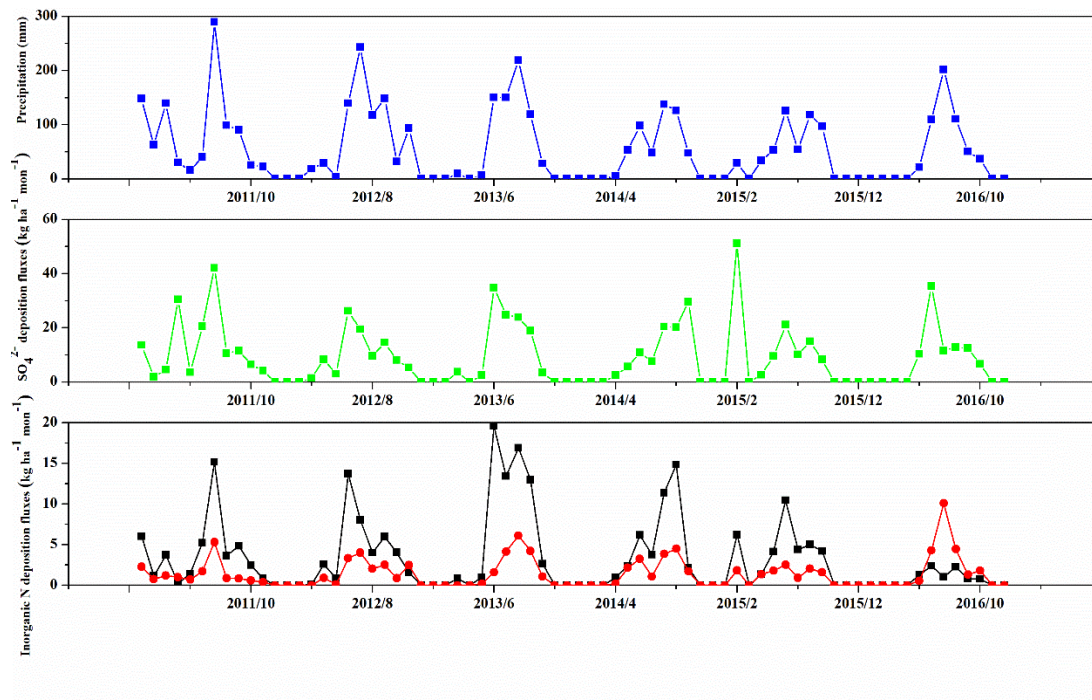

**Fig. S81** The precipitation and wet deposition fluxes of secondary ions in Tonghua

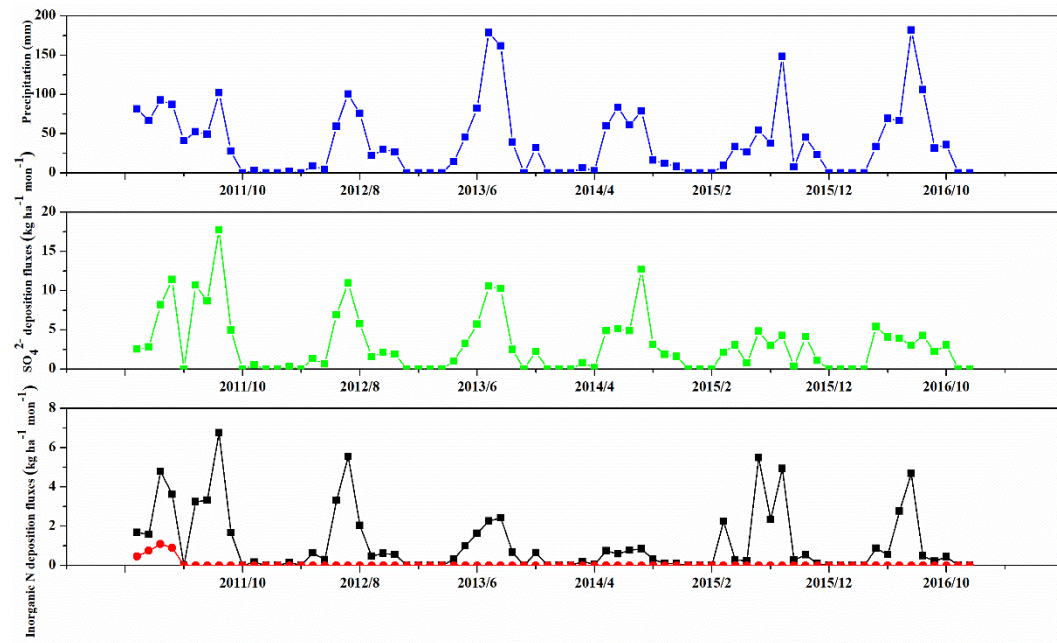

**Fig. S82** The precipitation and wet deposition fluxes of secondary ions in Weifang

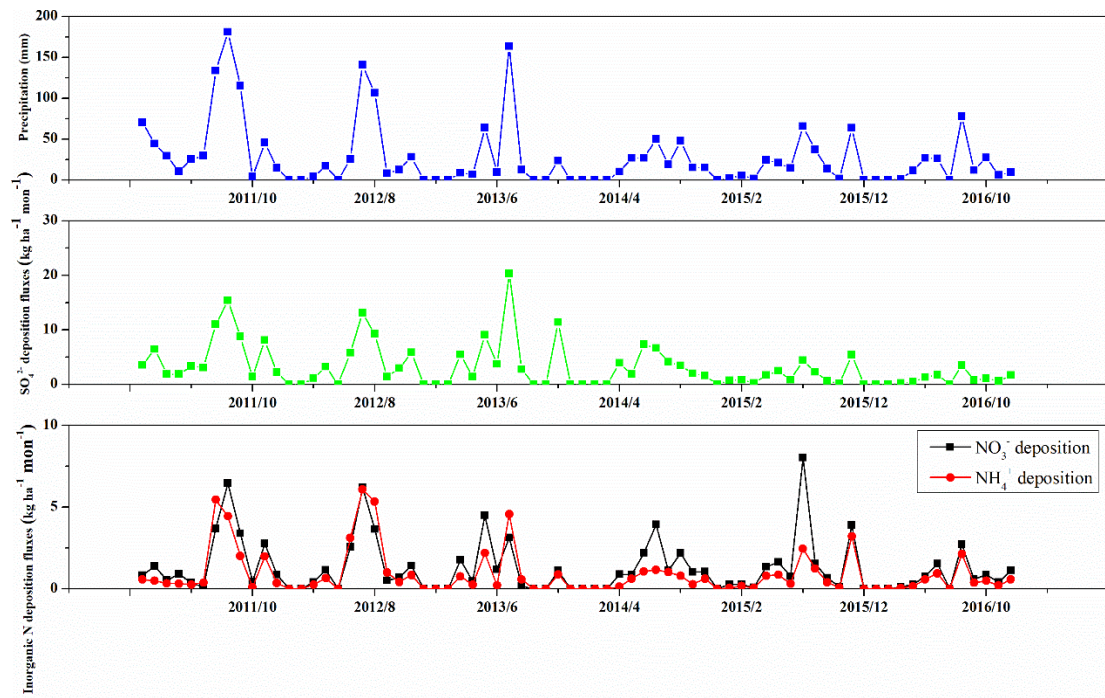

**Fig. S83** The precipitation and wet deposition fluxes of secondary ions in Wuhai

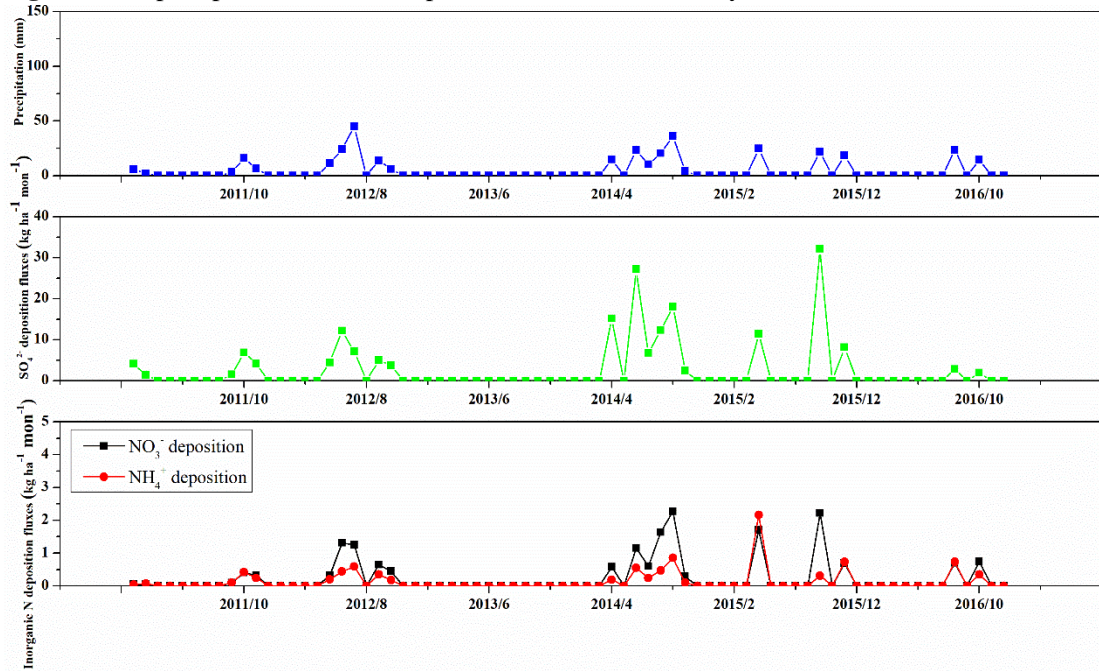

**Fig. S84** The precipitation and wet deposition fluxes of secondary ions in Ulanqab

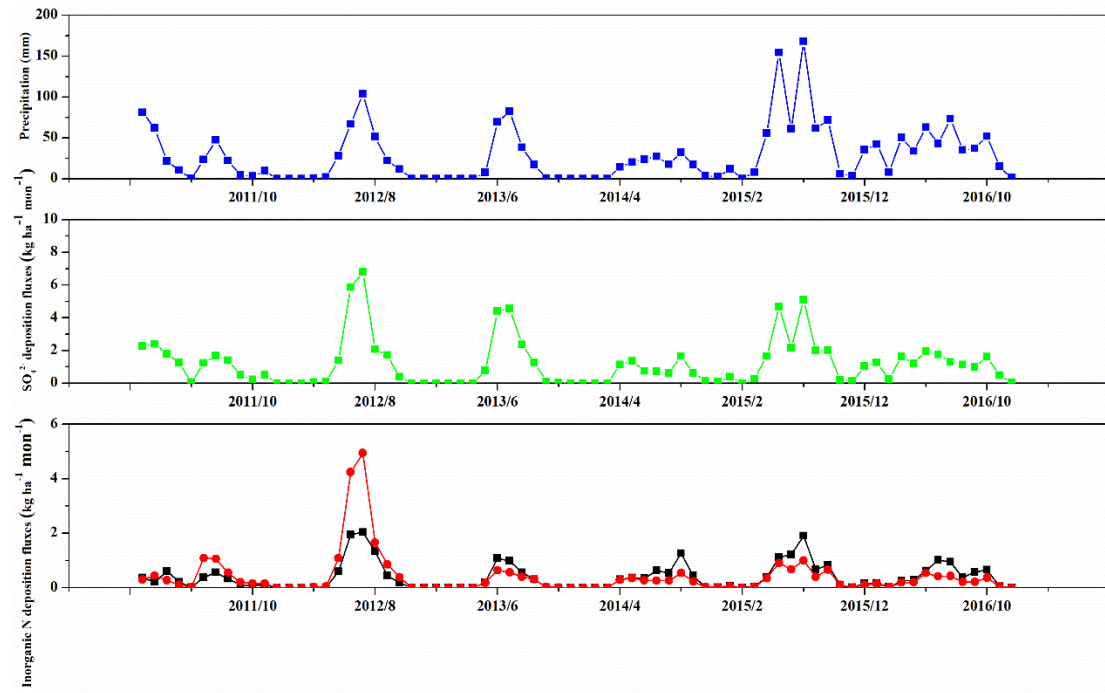

**Fig. S85** The precipitation and wet deposition fluxes of secondary ions in Wuhu

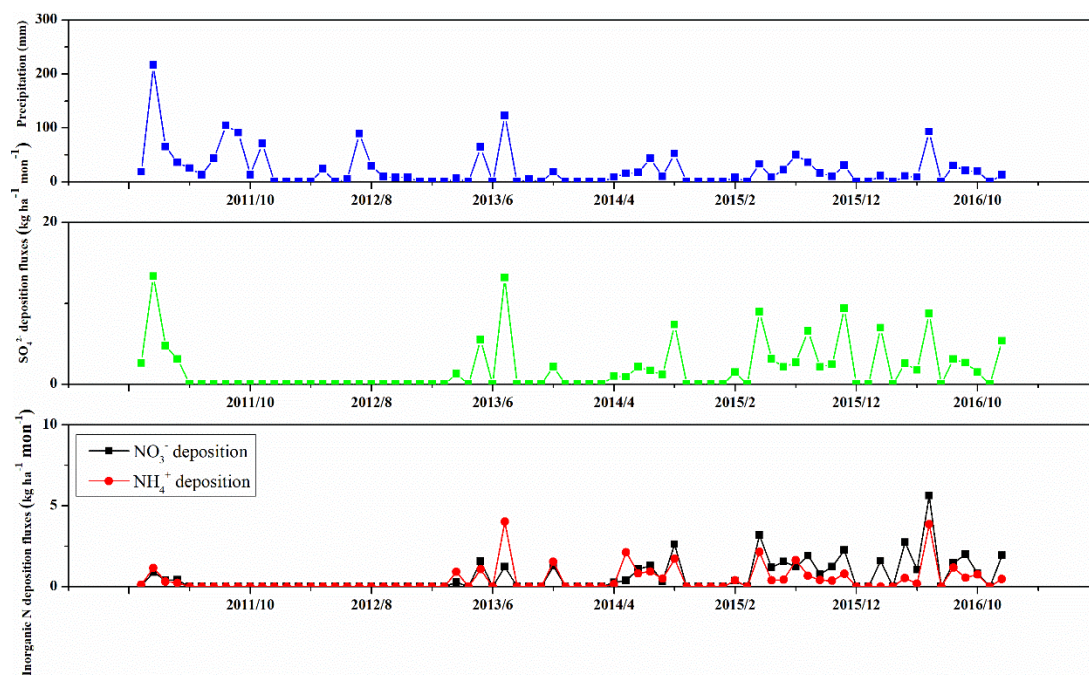



**Fig. S86** The precipitation and wet deposition fluxes of secondary ions in Xining

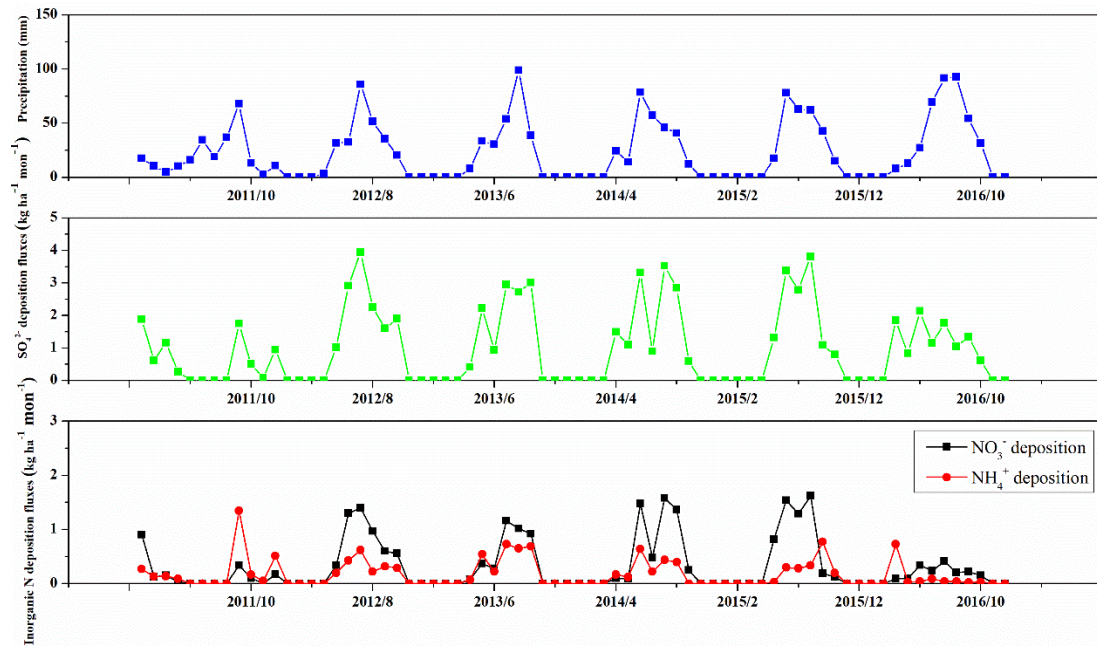

**Fig. S87** The precipitation and wet deposition fluxes of secondary ions in Xishuangbanna

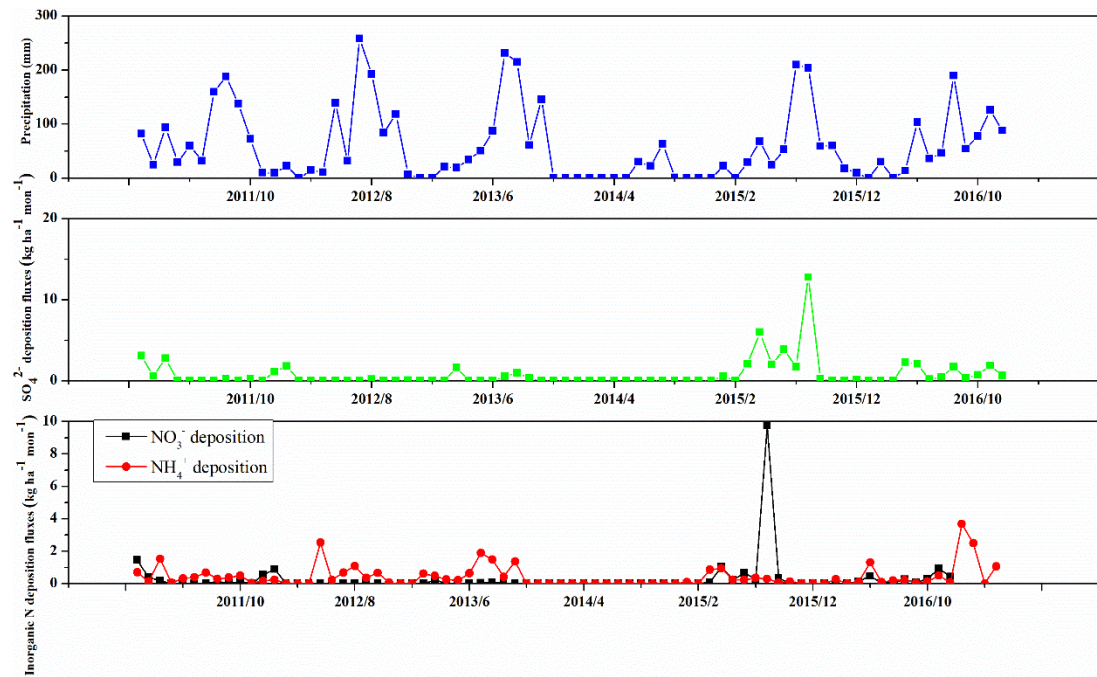

**Fig. S88** The precipitation and wet deposition fluxes of secondary ions in Xinxiang

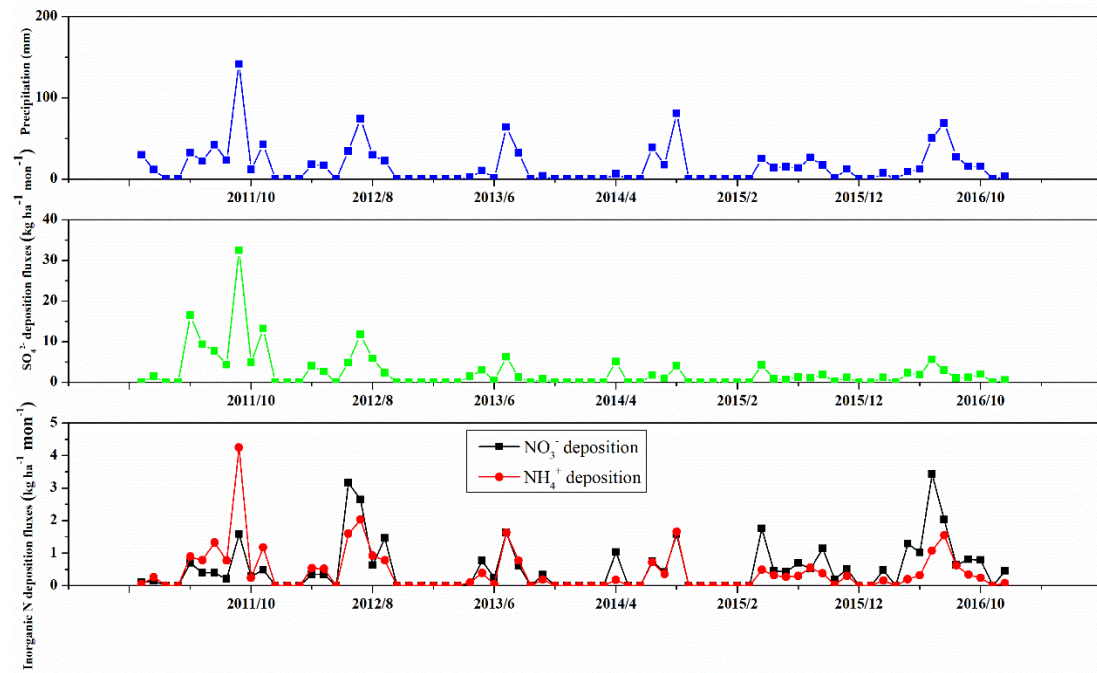

**Fig. S89** The precipitation and wet deposition fluxes of secondary ions in Xinyu

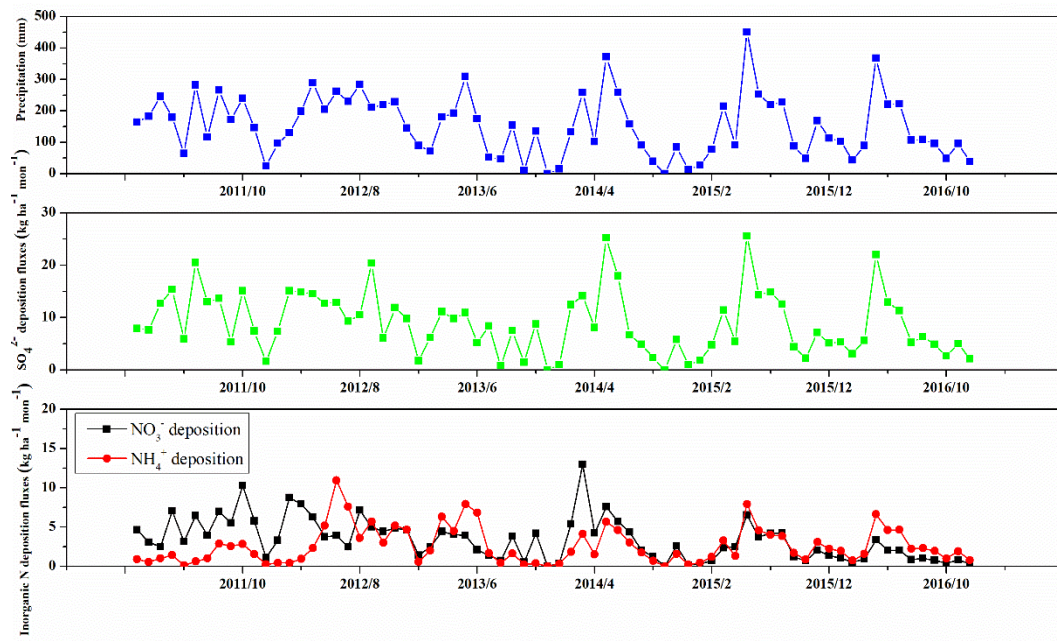

**Fig. S90** The precipitation and wet deposition fluxes of secondary ions in Suqian

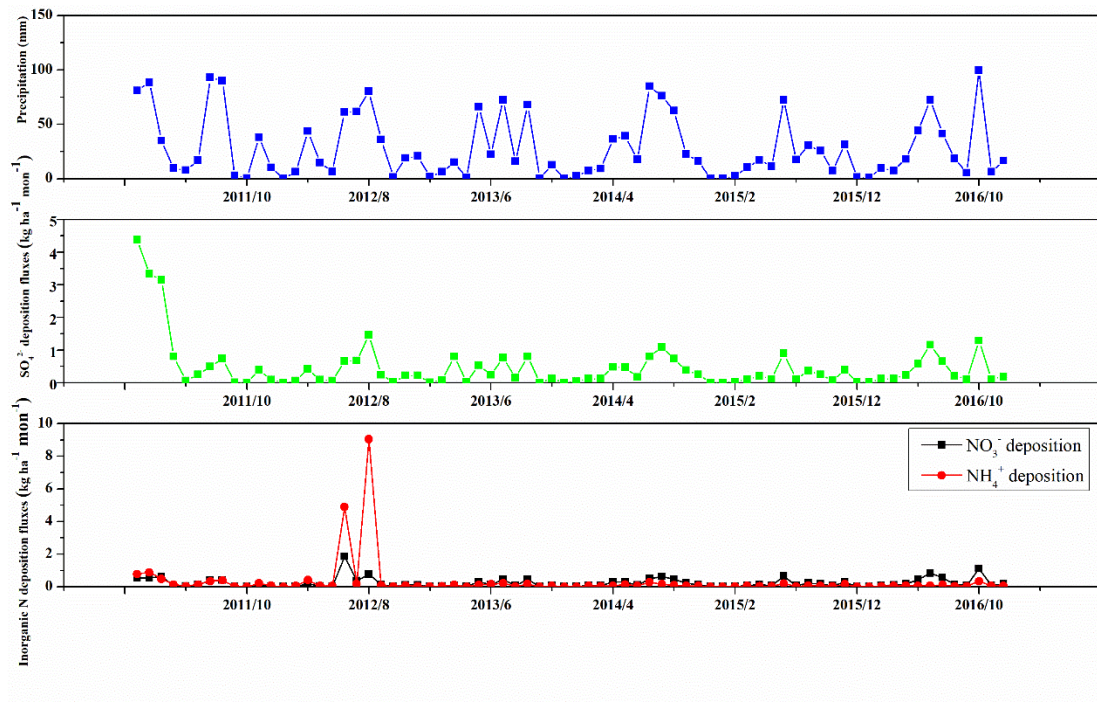

**Fig. S91** The precipitation and wet deposition fluxes of secondary ions in Suzhou

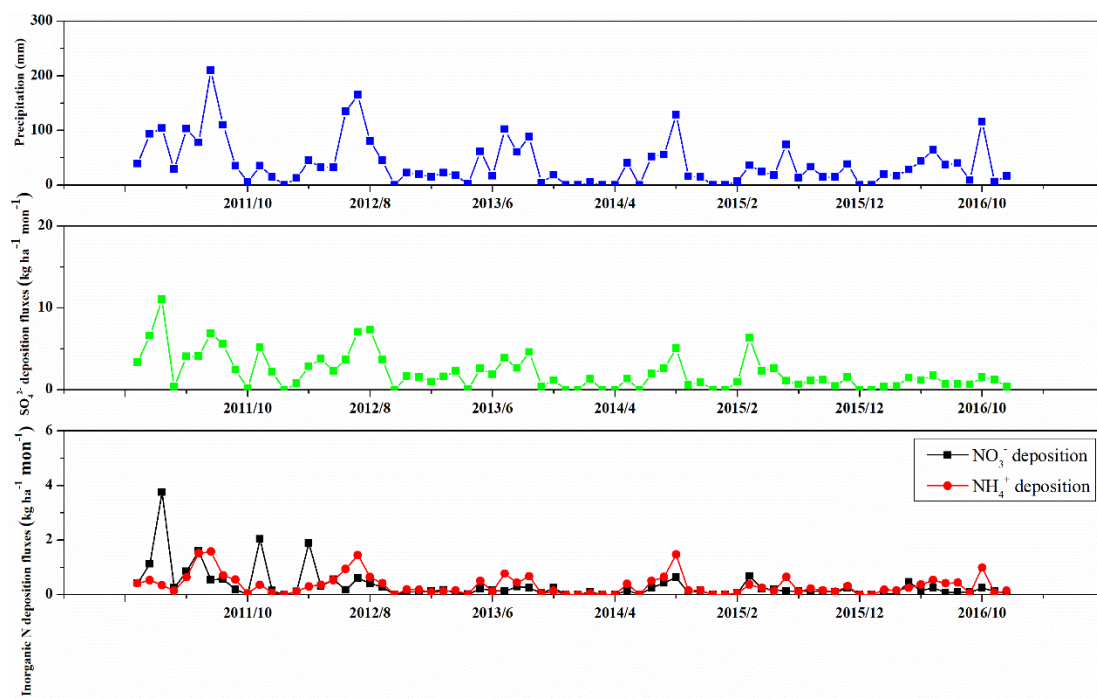

**Fig. S92** The precipitation and wet deposition fluxes of secondary ions in Yanbian

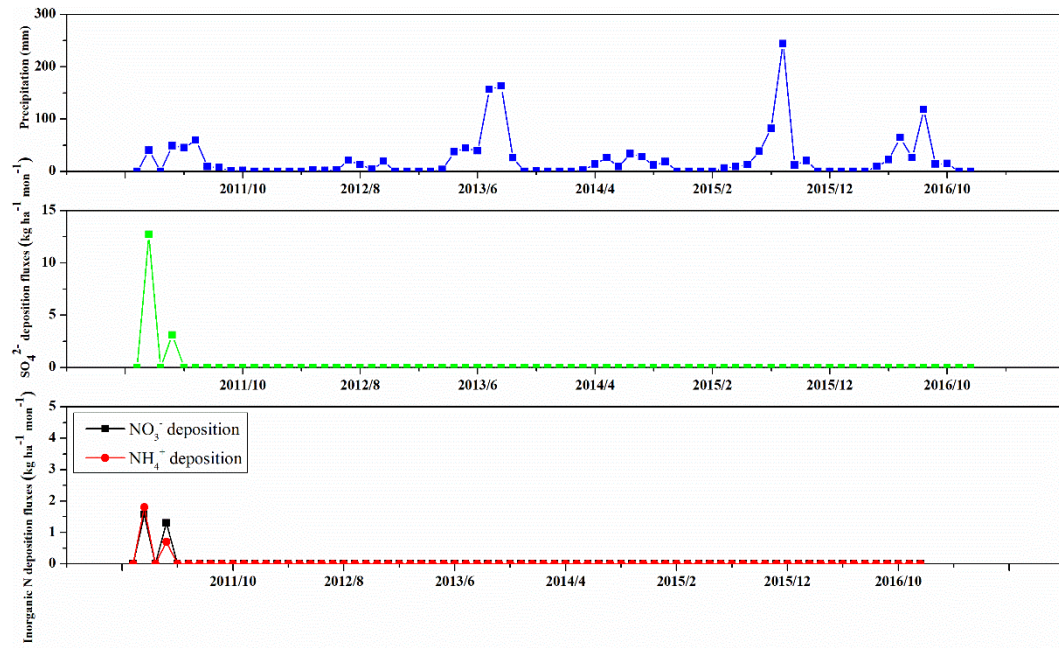

**Fig. S93** The precipitation and wet deposition fluxes of secondary ions in Yingtan

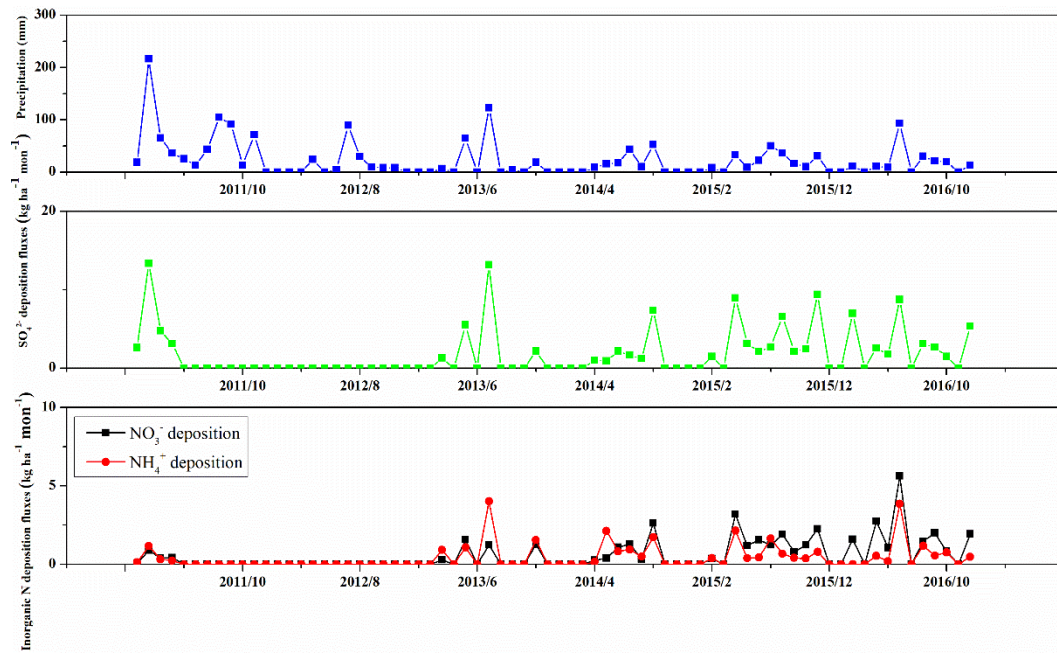



**Fig. S94** The precipitation and wet deposition fluxes of secondary ions in Zhenjiang

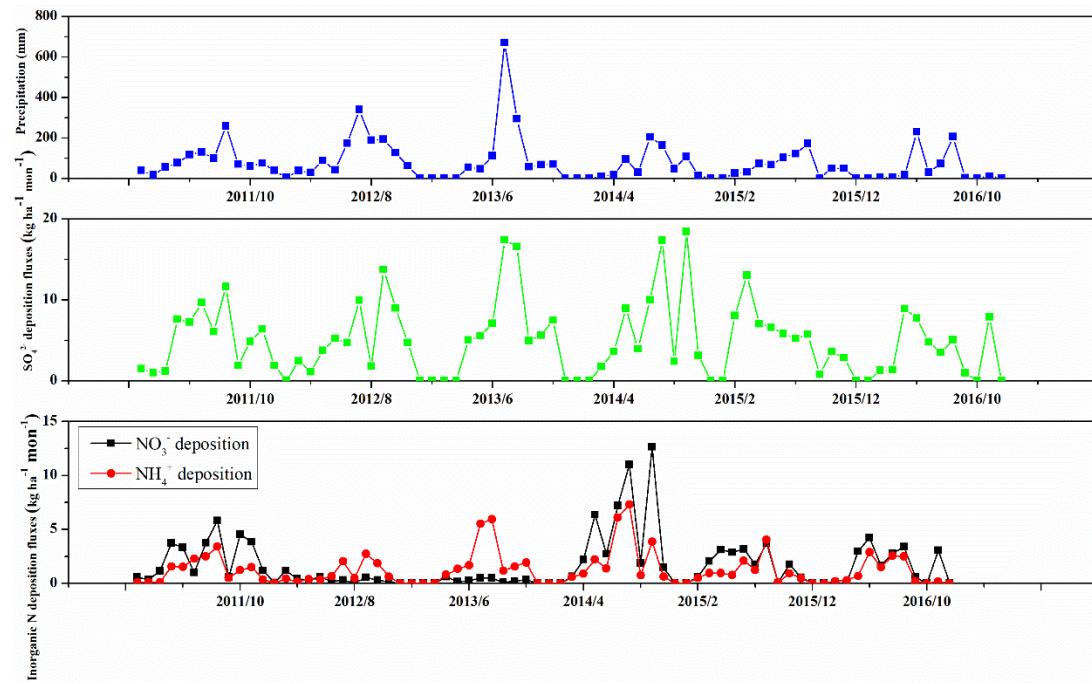

Fig. S95 The precipitation and wet deposition fluxes of secondary ions in Altay

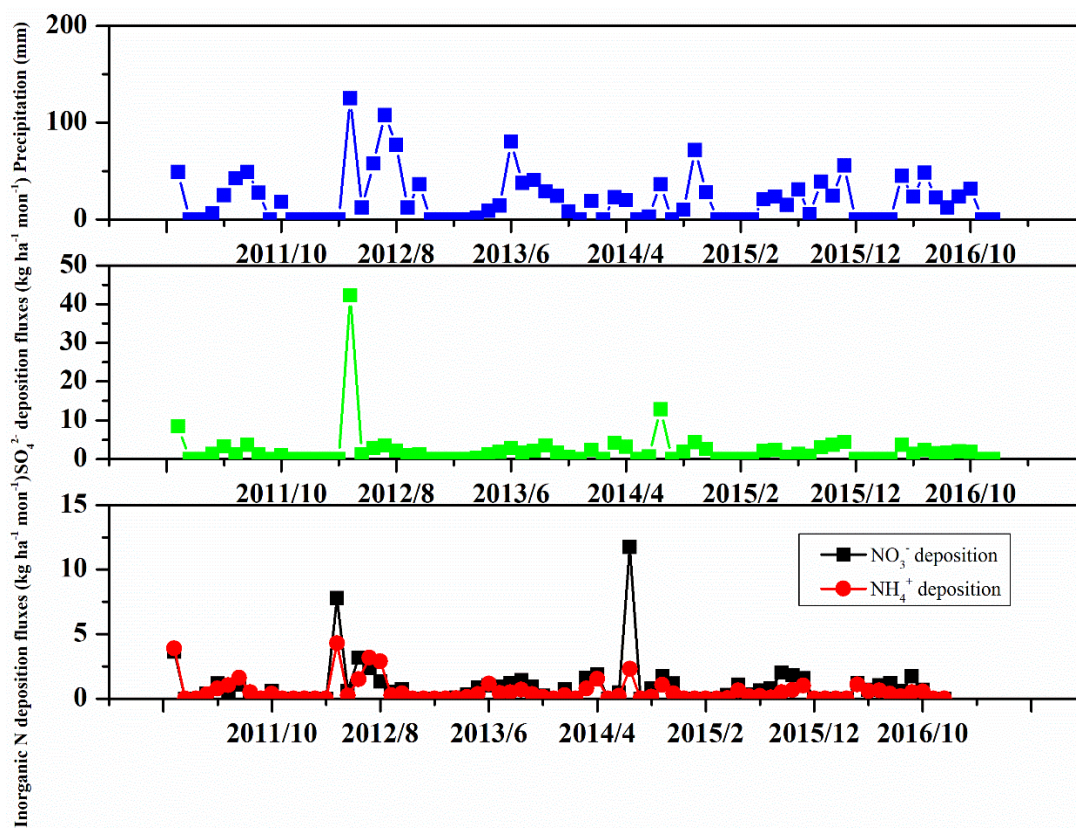

Fig. S96 The precipitation and wet deposition fluxes of secondary ions in Anyang

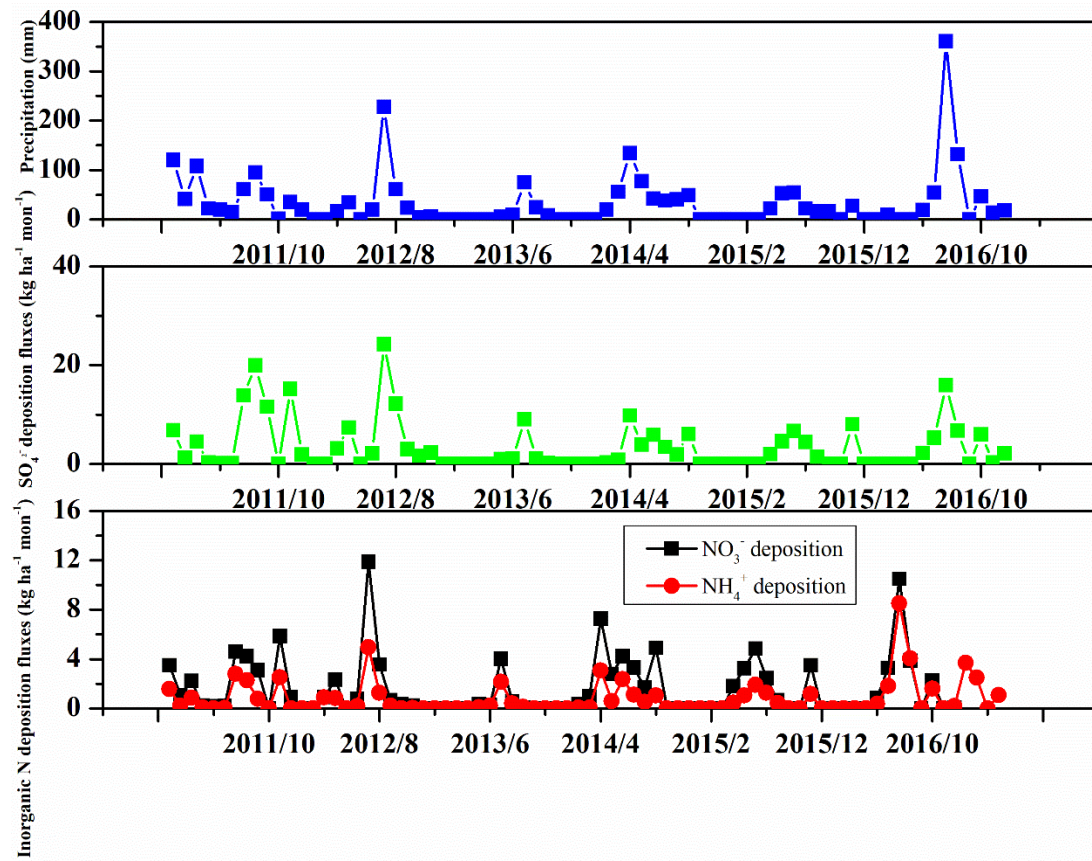

Fig. S97 The precipitation and wet deposition fluxes of secondary ions in Baishan

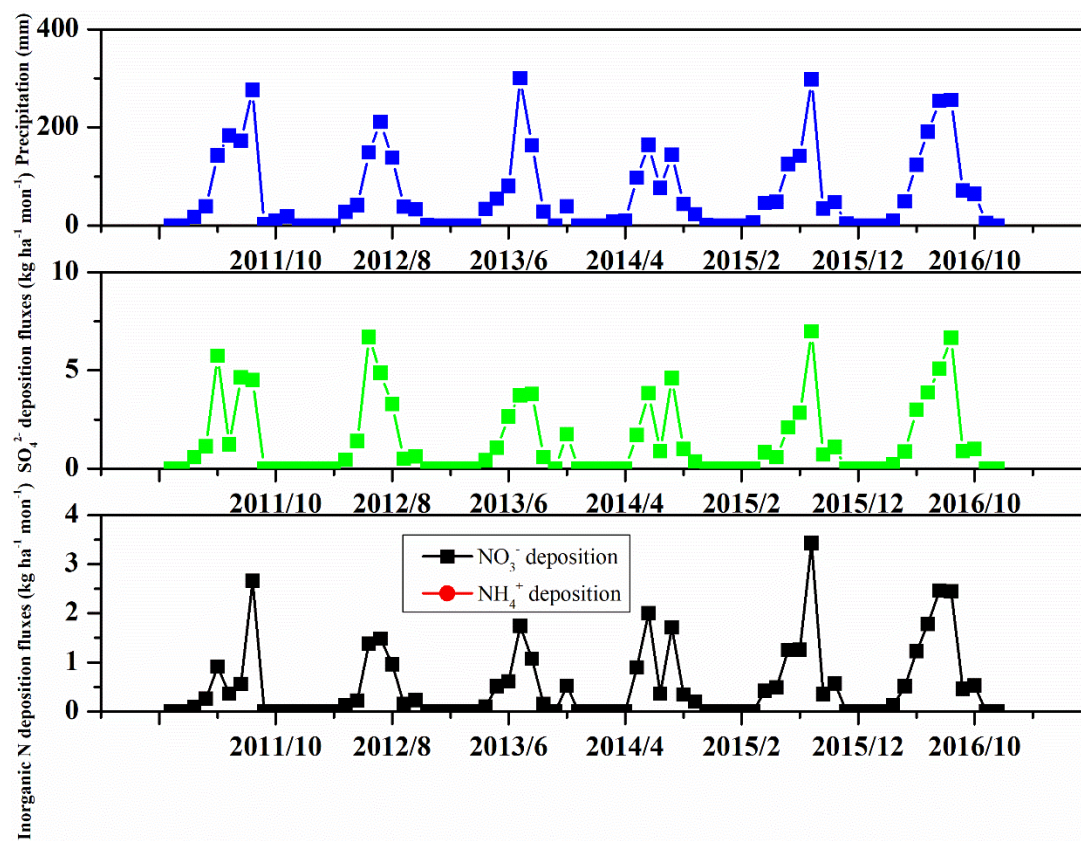

Fig. S98 The precipitation and wet deposition fluxes of secondary ions in Baoshan

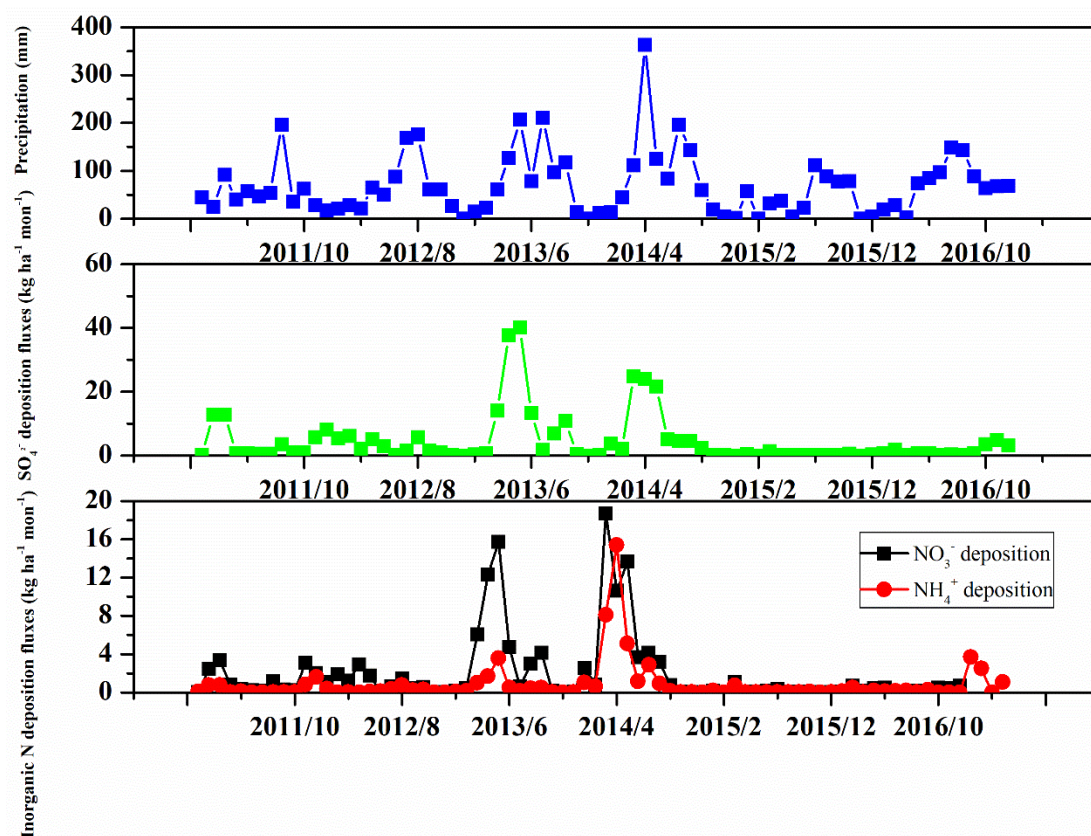

**Fig. S99** The precipitation and wet deposition fluxes of secondary ions in Dali

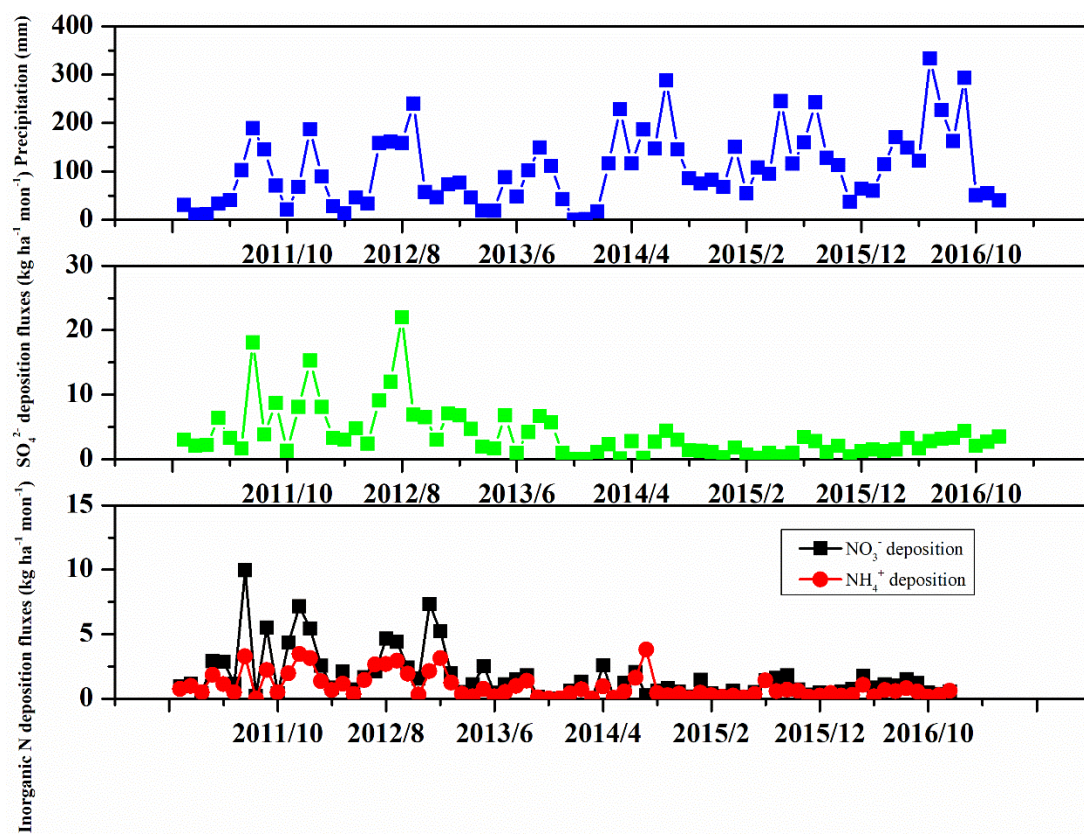

**Fig. S100** The precipitation and wet deposition fluxes of secondary ions in Dezhou

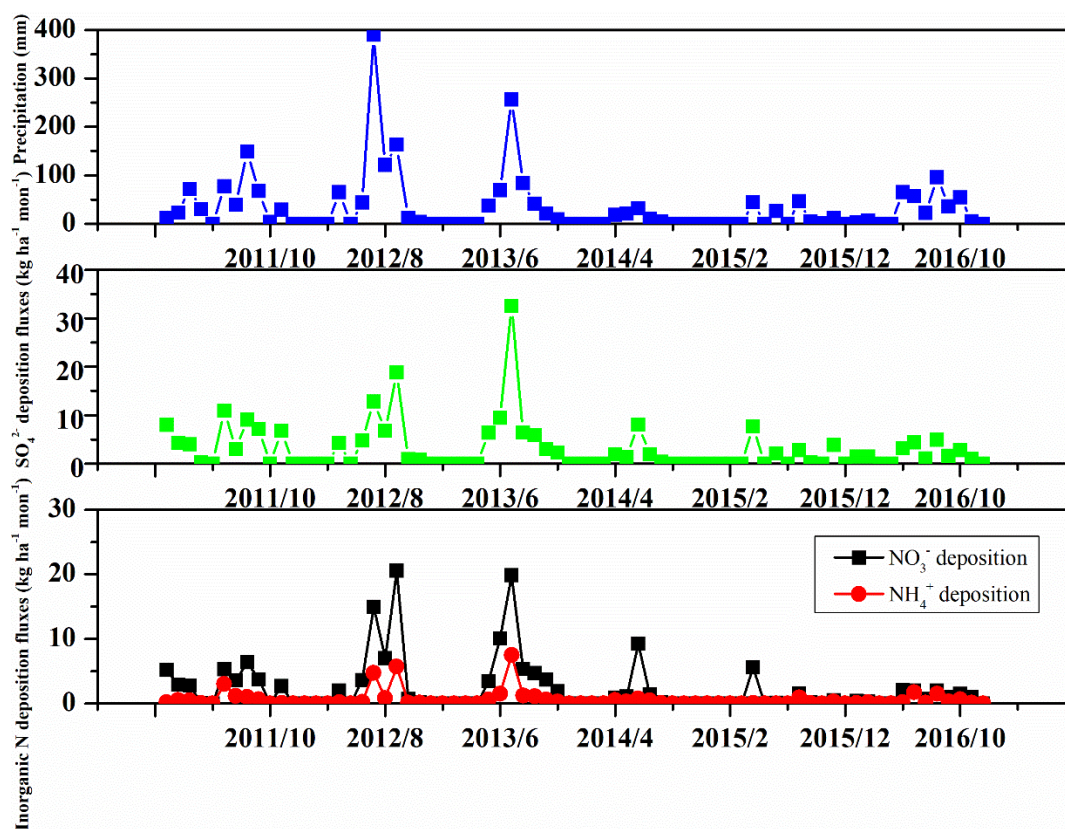

Fig. S101 The precipitation and wet deposition fluxes of secondary ions in Dongying

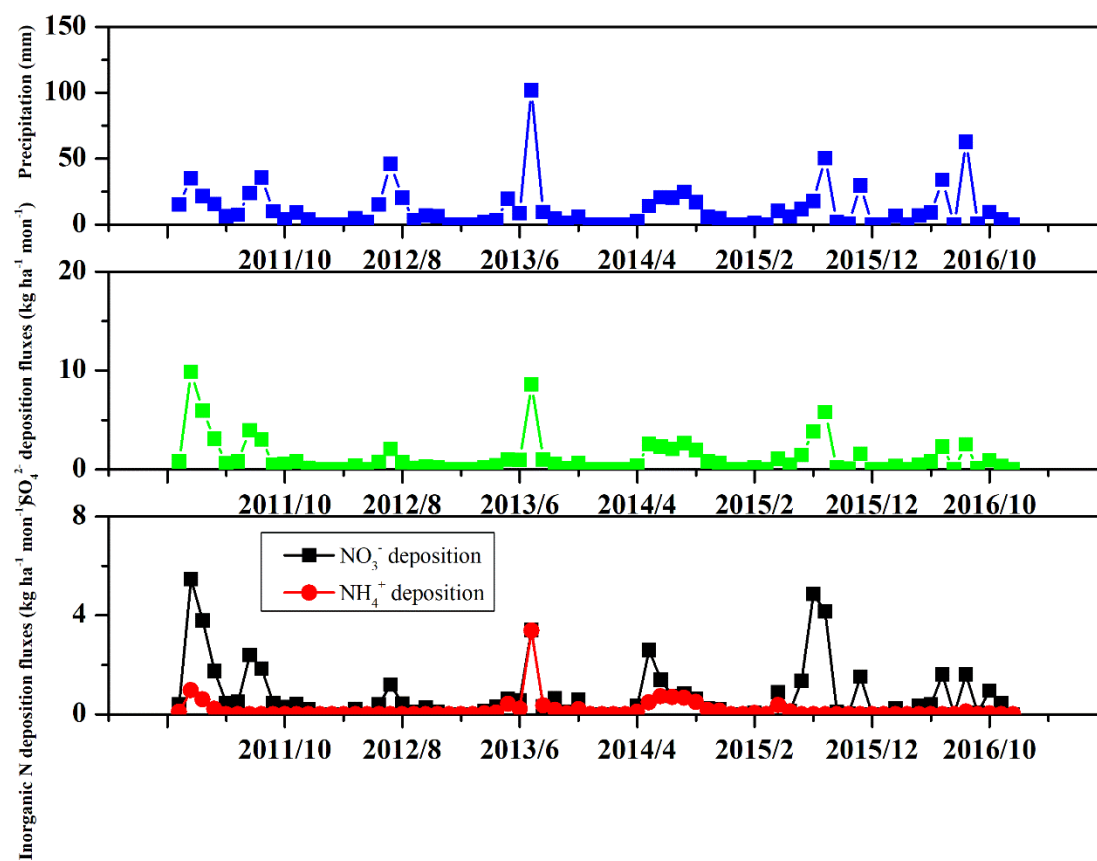



**Fig. S102** The precipitation and wet deposition fluxes of secondary ions in Guiyang

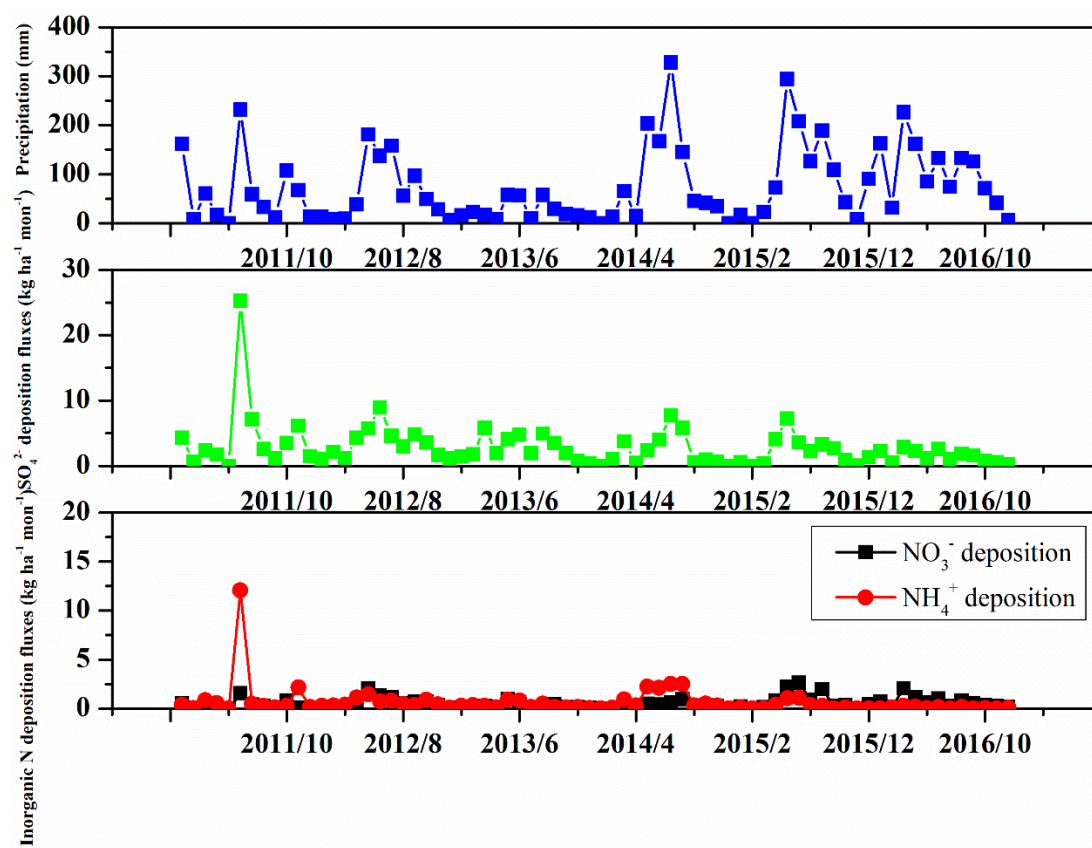

Fig. S103 The precipitation and wet deposition fluxes of secondary ions in Honghe

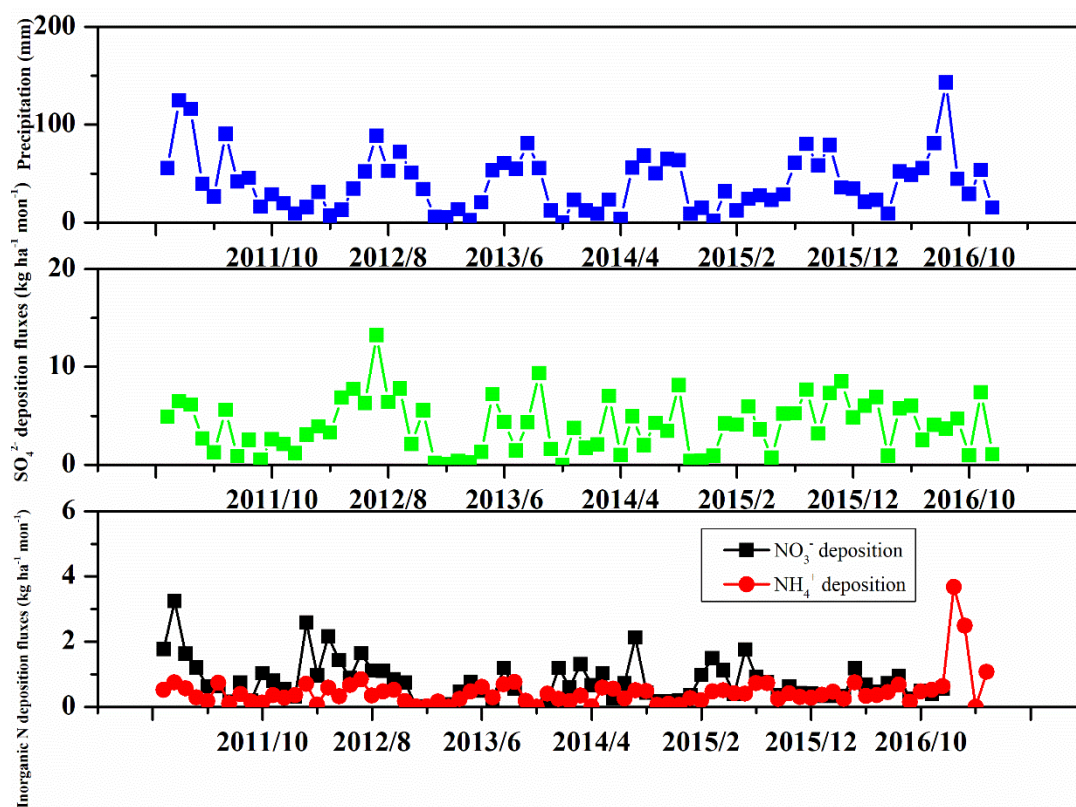

Fig. S104 The precipitation and wet deposition fluxes of secondary ions in Jieyang

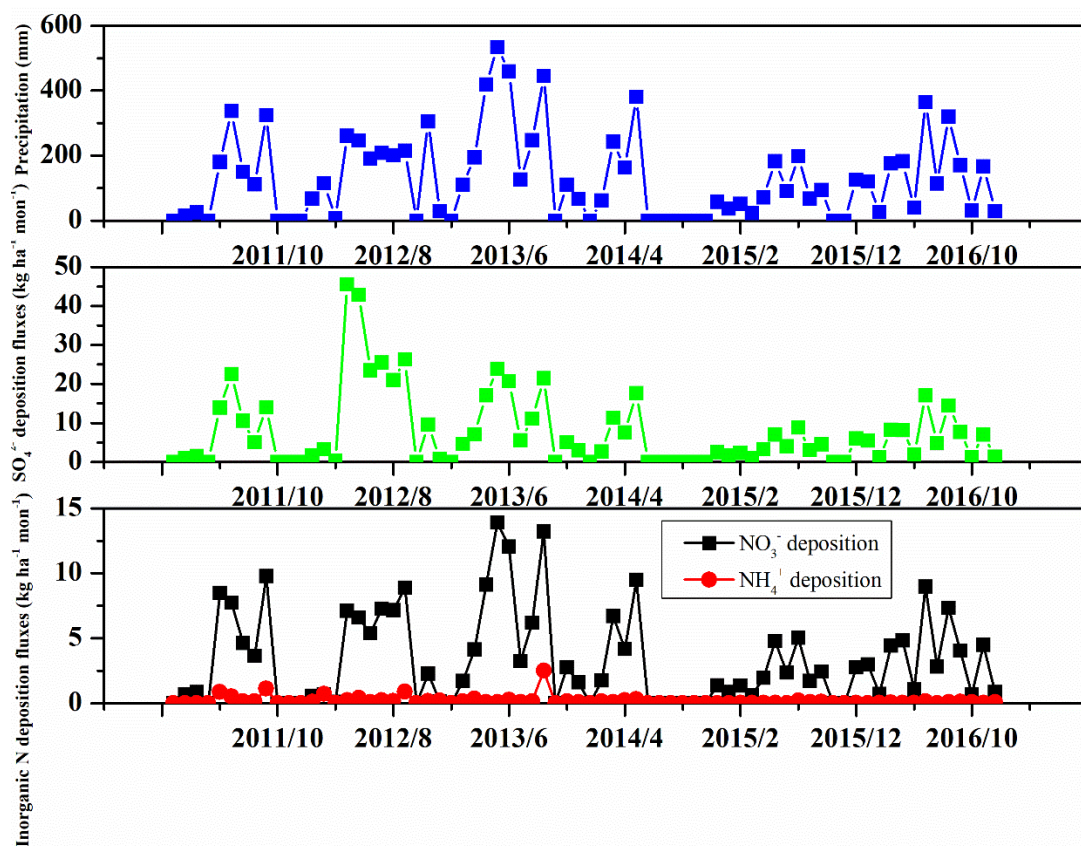

Fig. S105 The precipitation and wet deposition fluxes of secondary ions in Jincheng

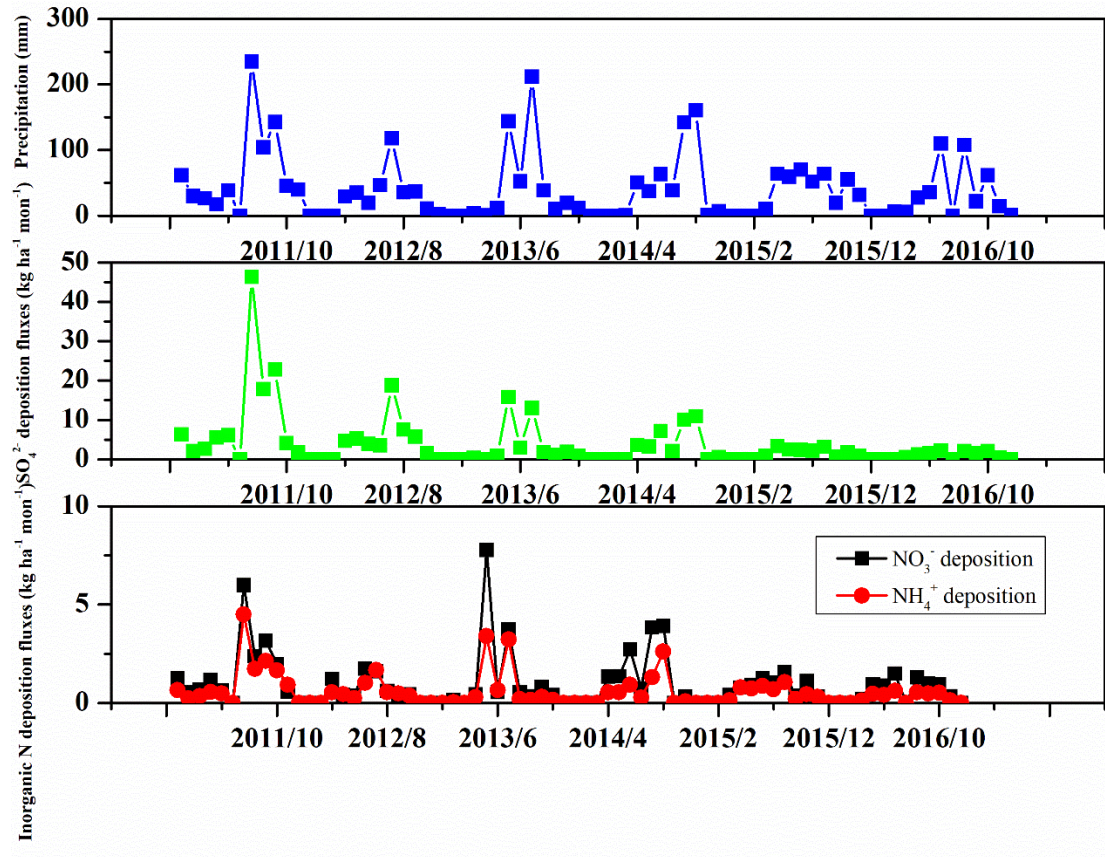

Fig. S106 The precipitation and wet deposition fluxes of secondary ions in Liupanshui

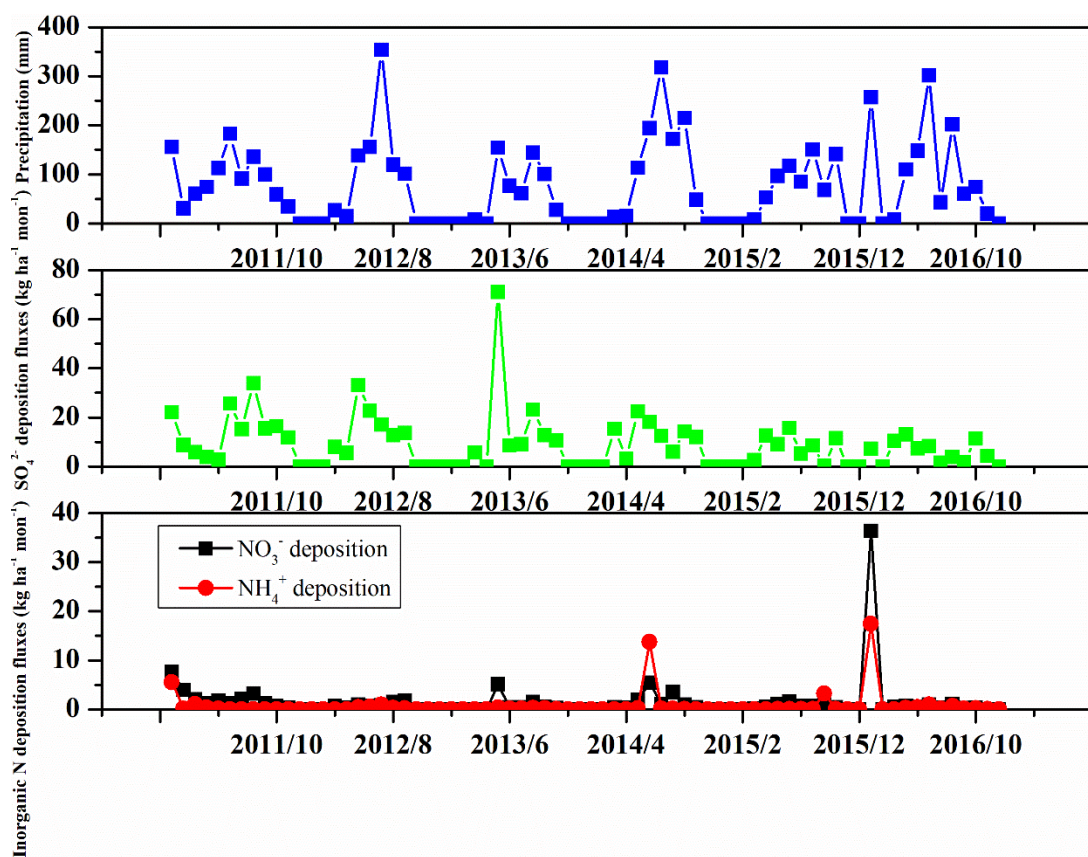

Fig. S107 The precipitation and wet deposition fluxes of secondary ions in Luoyang

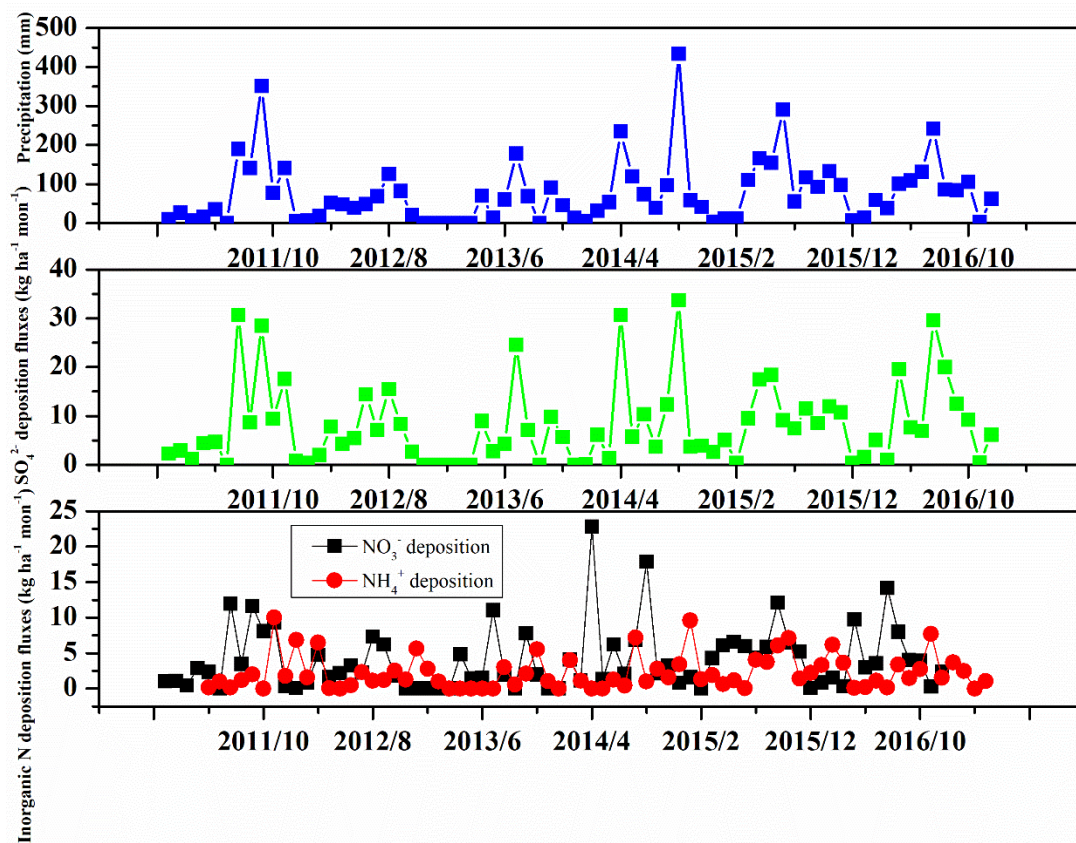

Fig. S108 The precipitation and wet deposition fluxes of secondary ions in Maanshan

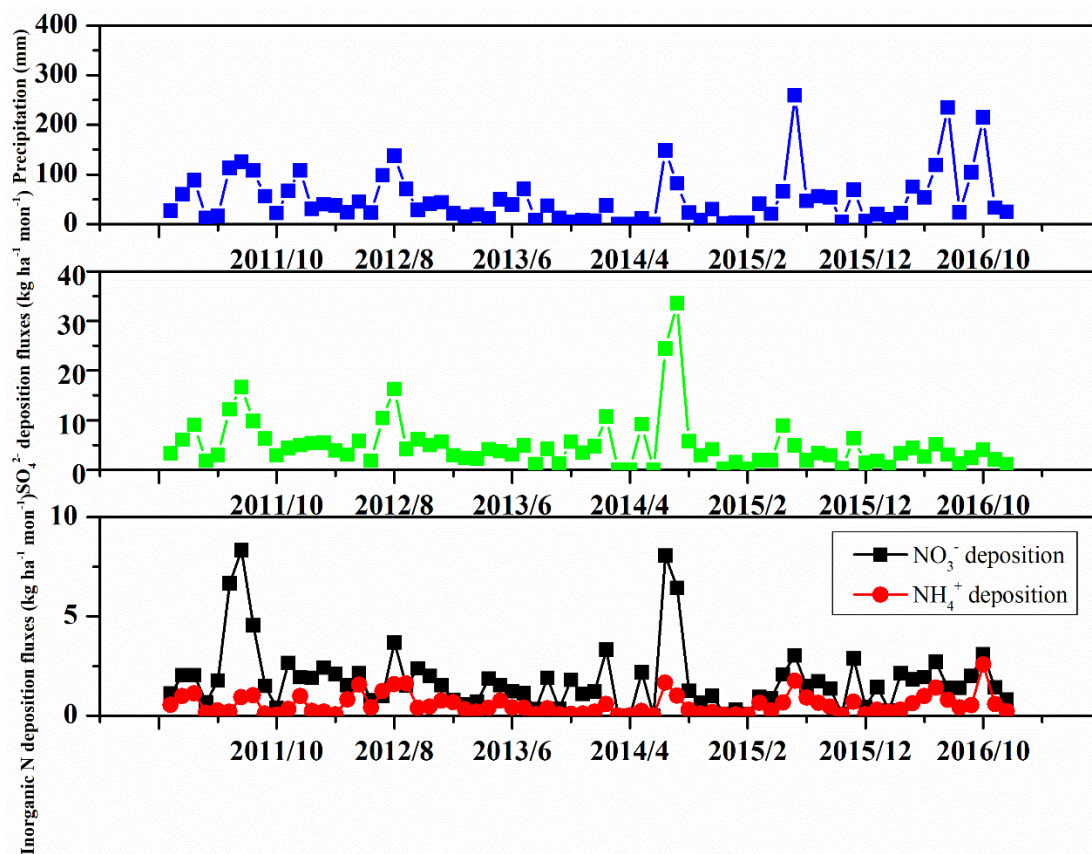

**Fig. S109** The precipitation and wet deposition fluxes of secondary ions in Maoming

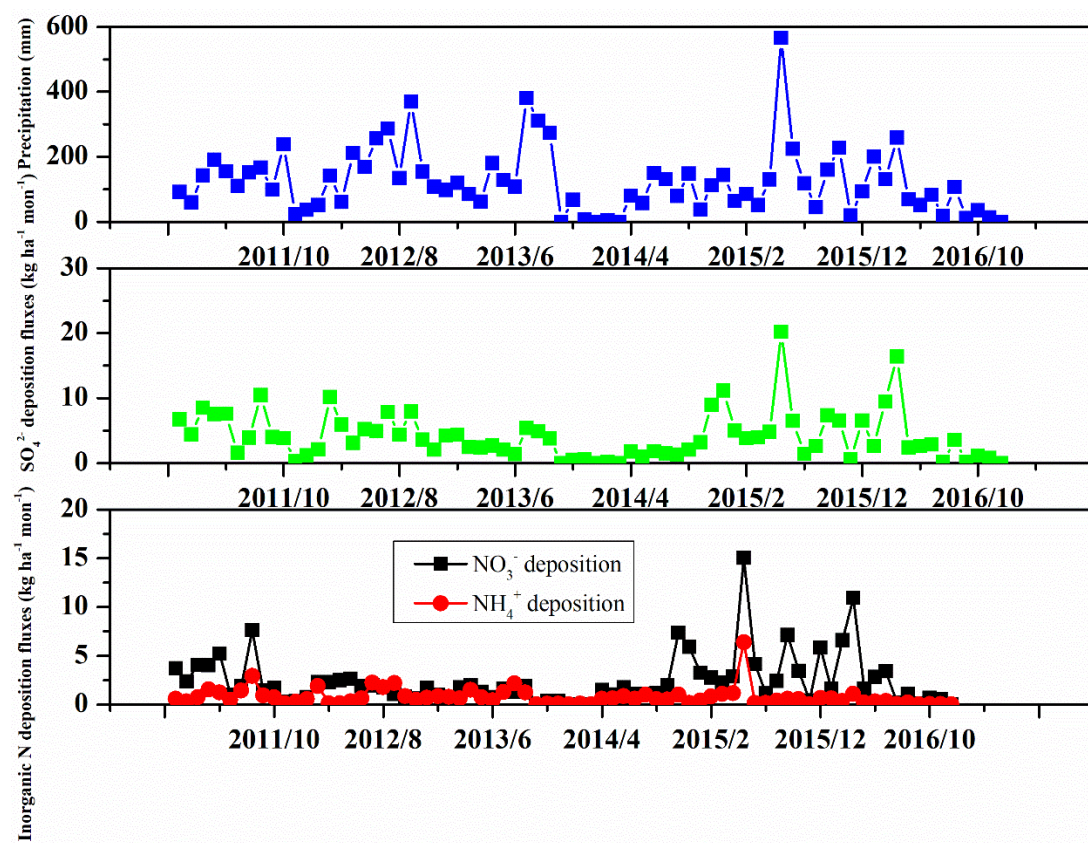



**Fig. S110** The precipitation and wet deposition fluxes of secondary ions in Mianyang

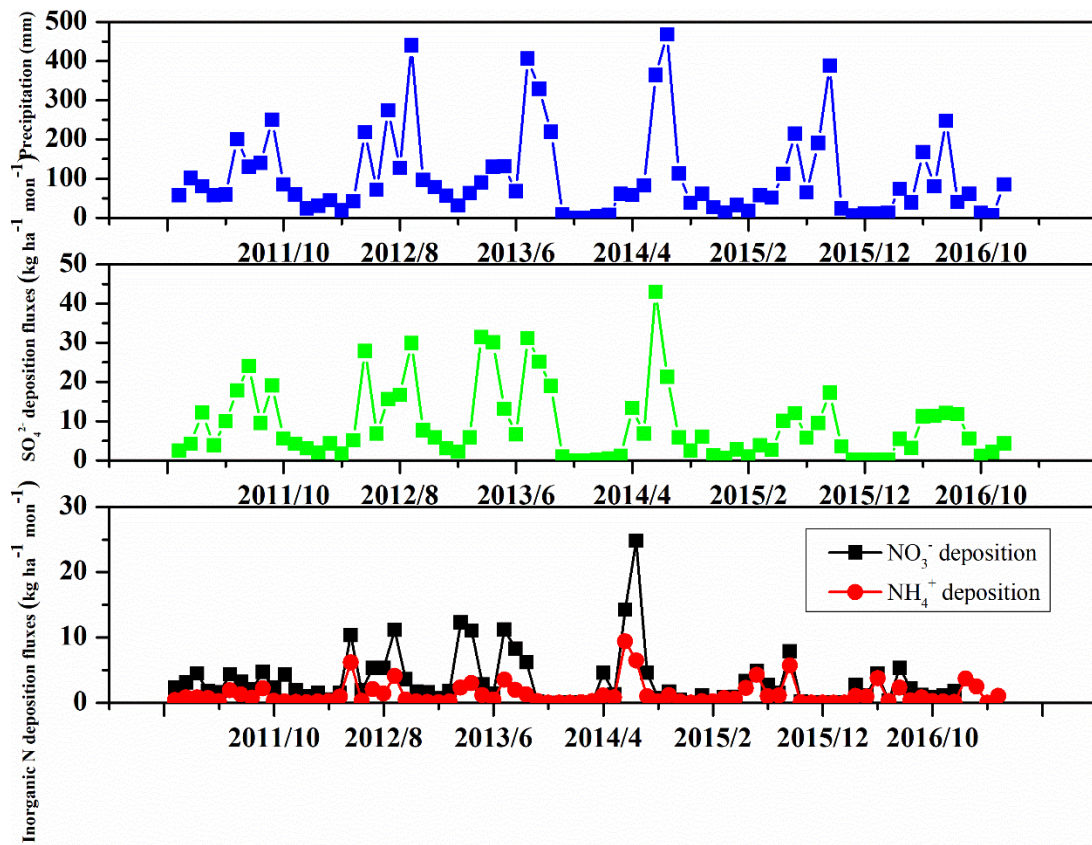

**Fig. S111** The precipitation and wet deposition fluxes of secondary ions in Sanmenxia

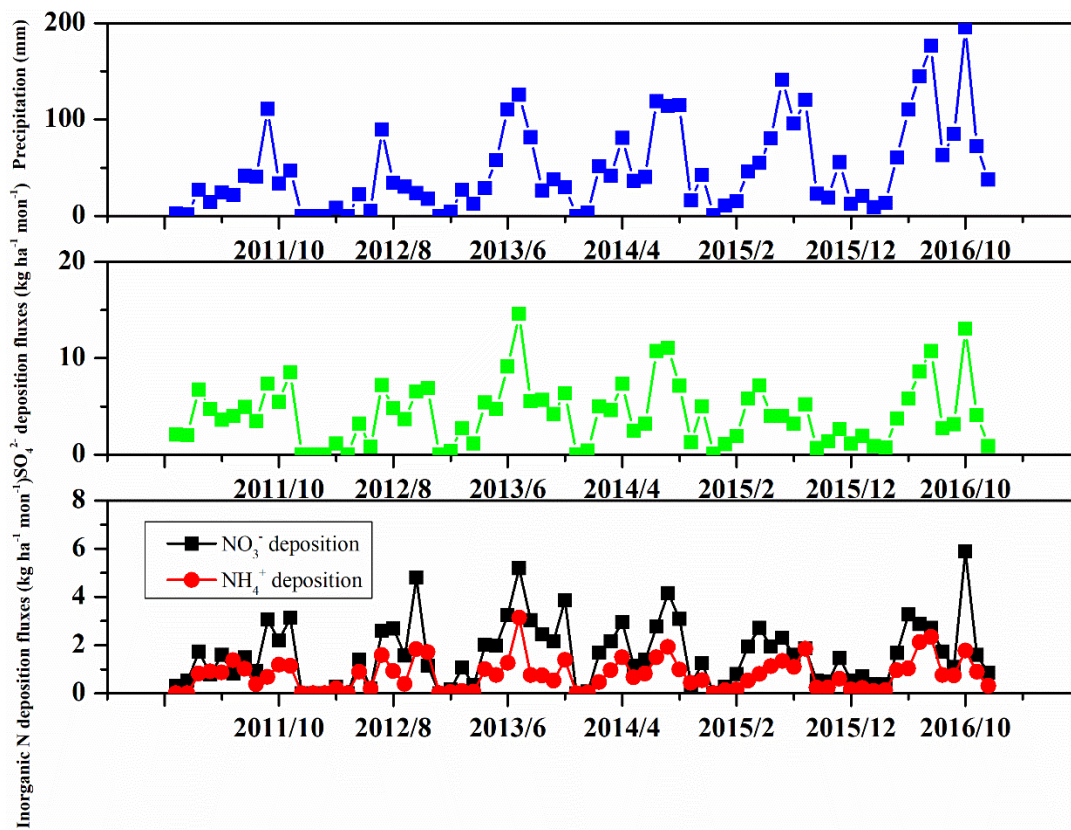

**Fig. S112** The precipitation and wet deposition fluxes of secondary ions in Shijiazhuang

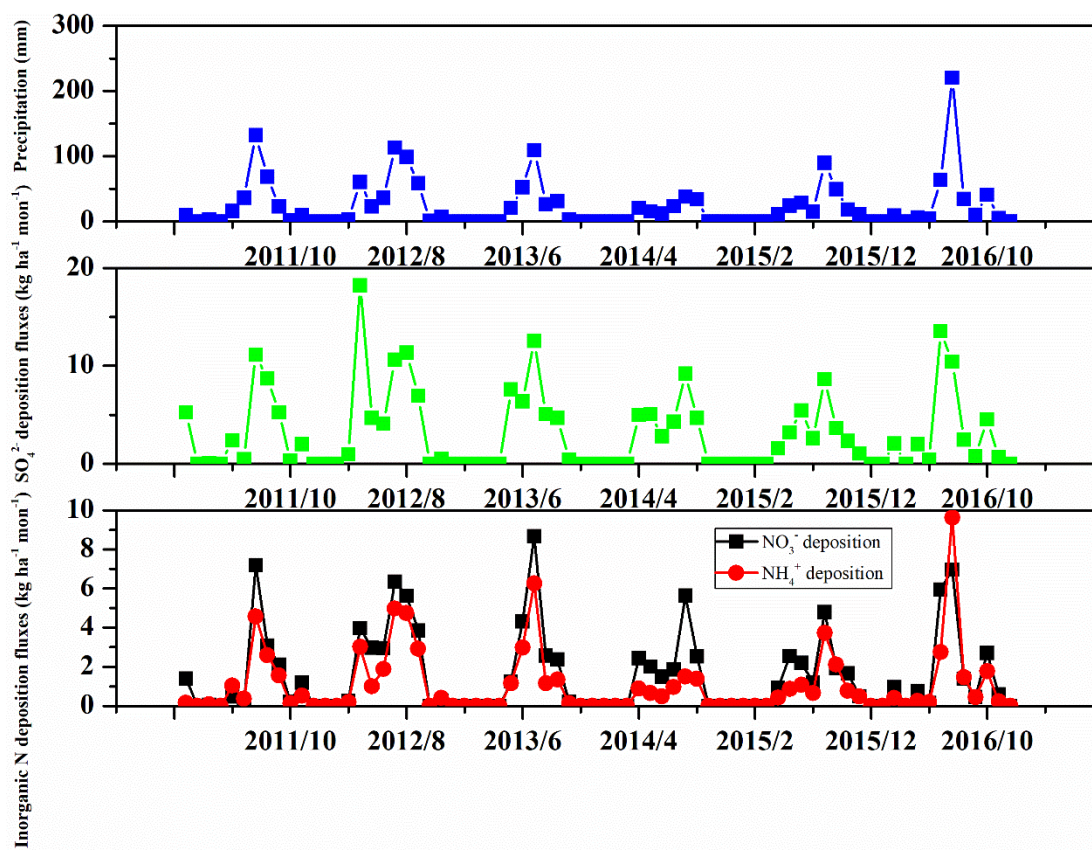

**Fig. S113** The precipitation and wet deposition fluxes of secondary ions in Suzhou

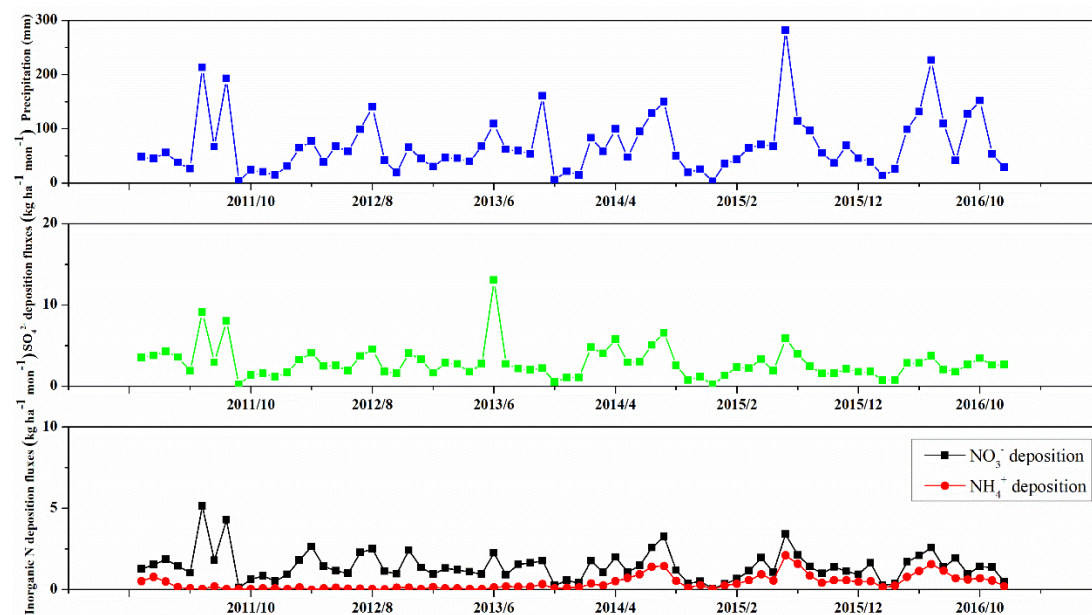

**Fig. S114** The precipitation and wet deposition fluxes of secondary ions in Tianjin

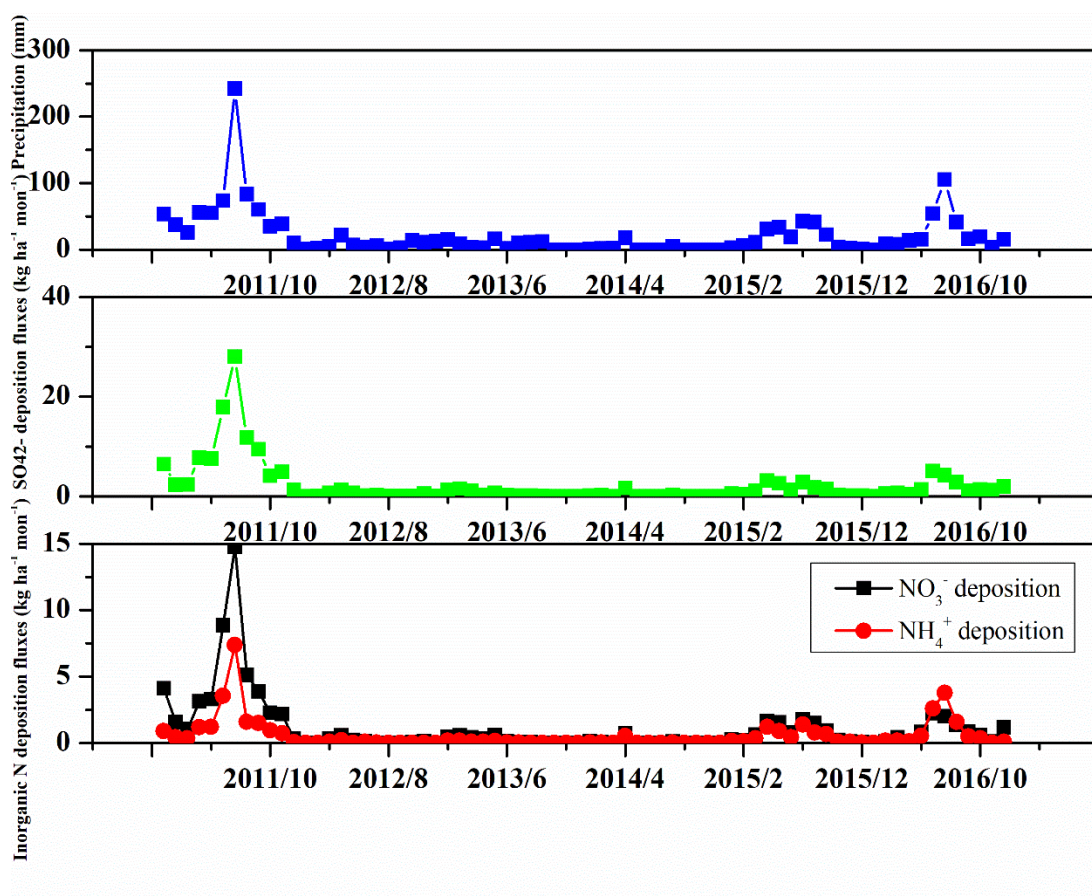

Fig. S115 The precipitation and wet deposition fluxes of secondary ions in Tieling

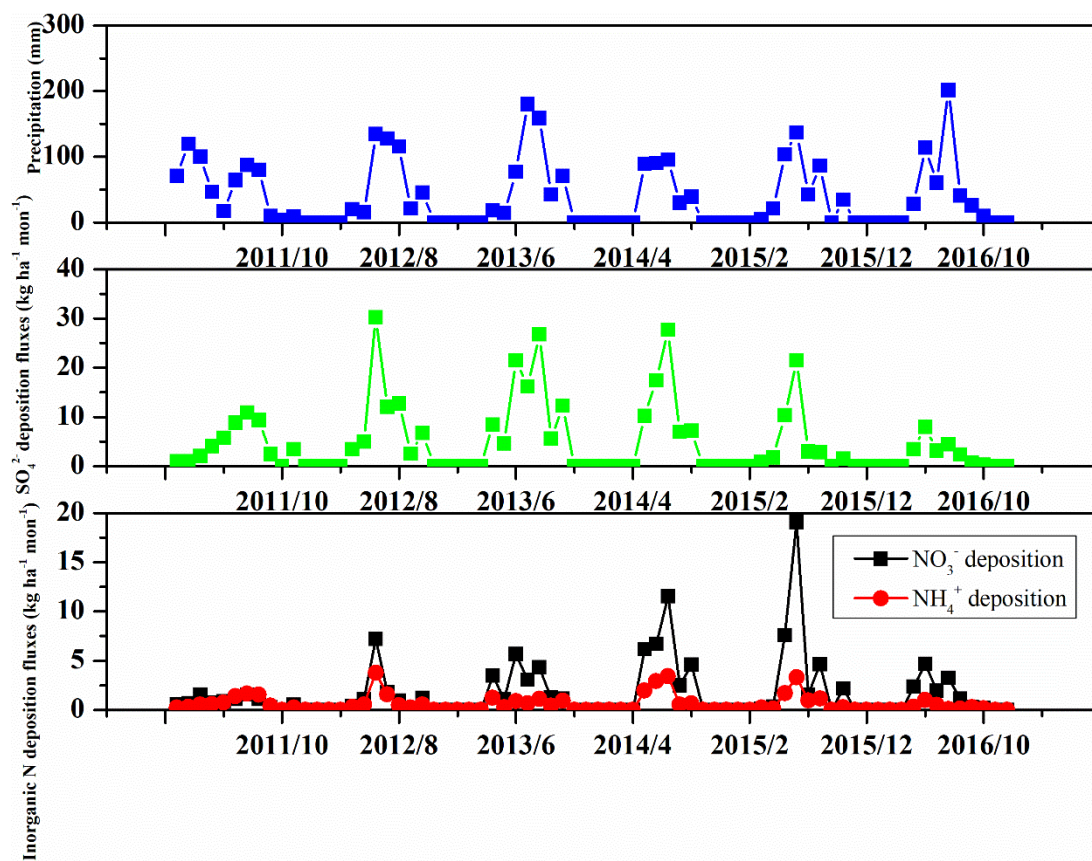

Fig. S116 The precipitation and wet deposition fluxes of secondary ions in Urumqi

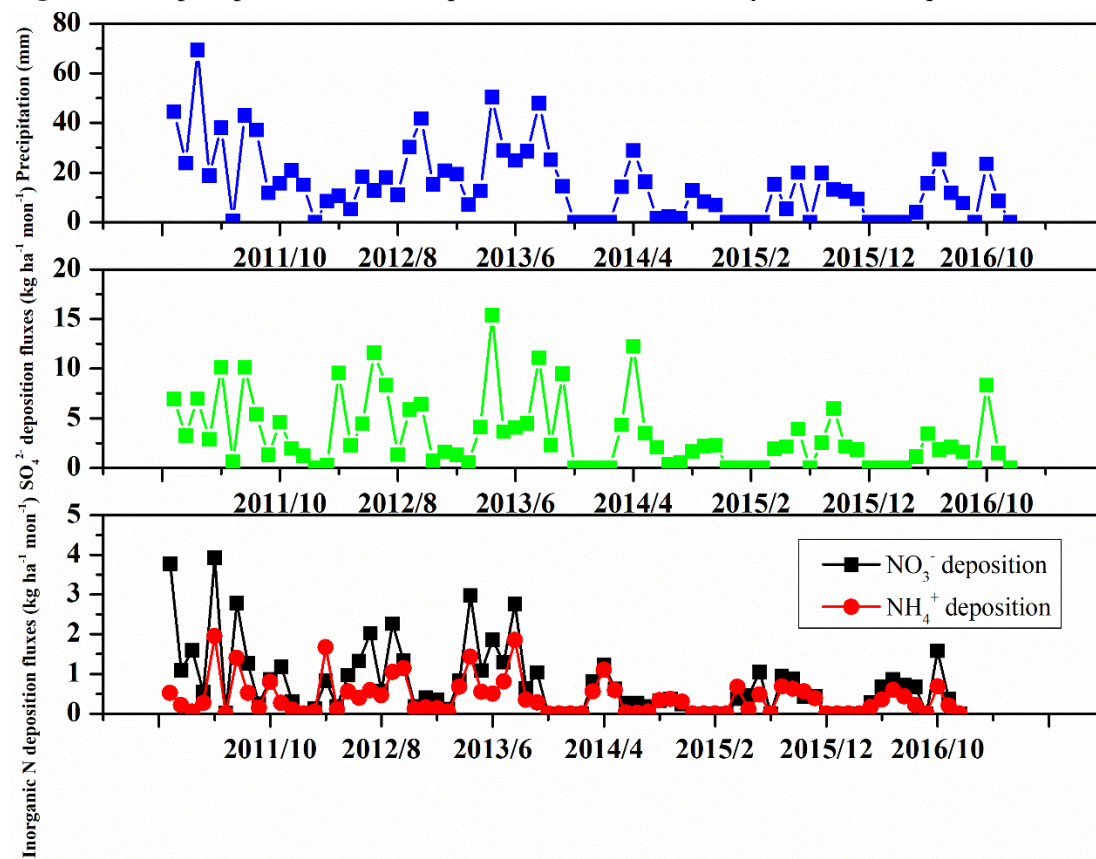

Fig. S117 The precipitation and wet deposition fluxes of secondary ions in Wuxi

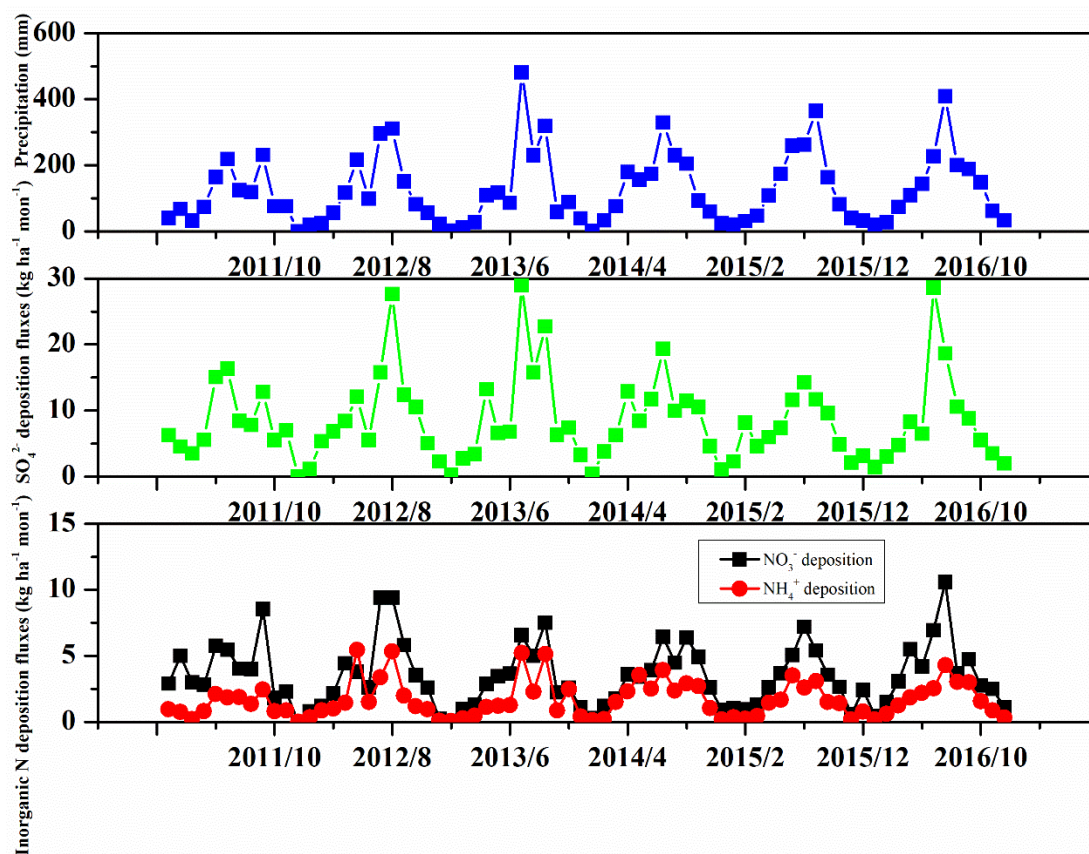



**Fig. S118** The precipitation and wet deposition fluxes of secondary ions in Xinyang

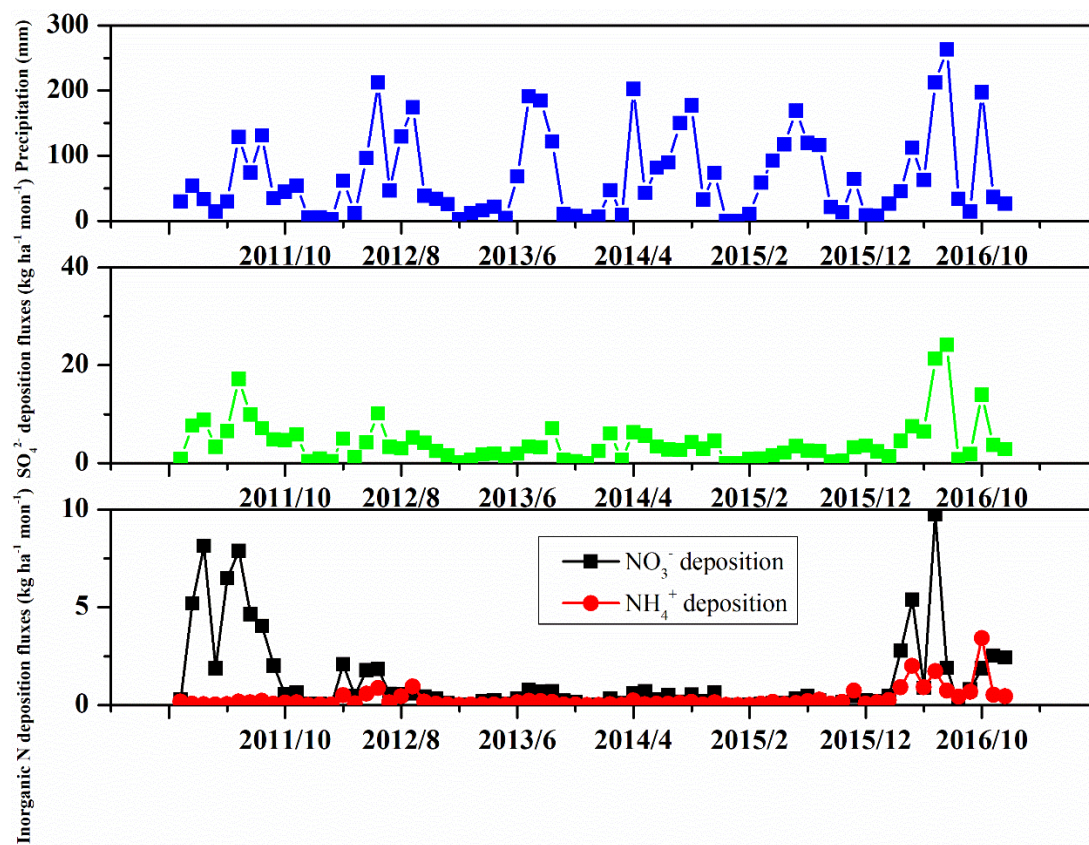

Fig. S119 The precipitation and wet deposition fluxes of secondary ions in Xingtai

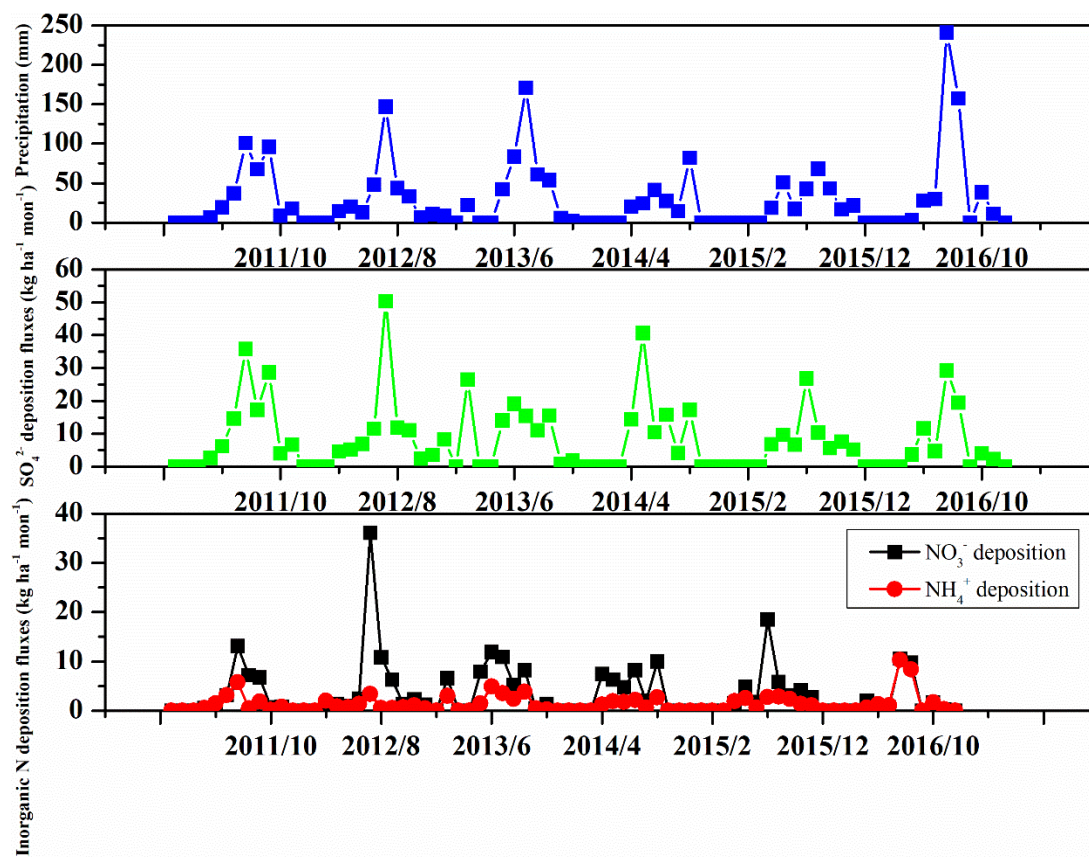

Fig. S120 The precipitation and wet deposition fluxes of secondary ions in Xuzhou

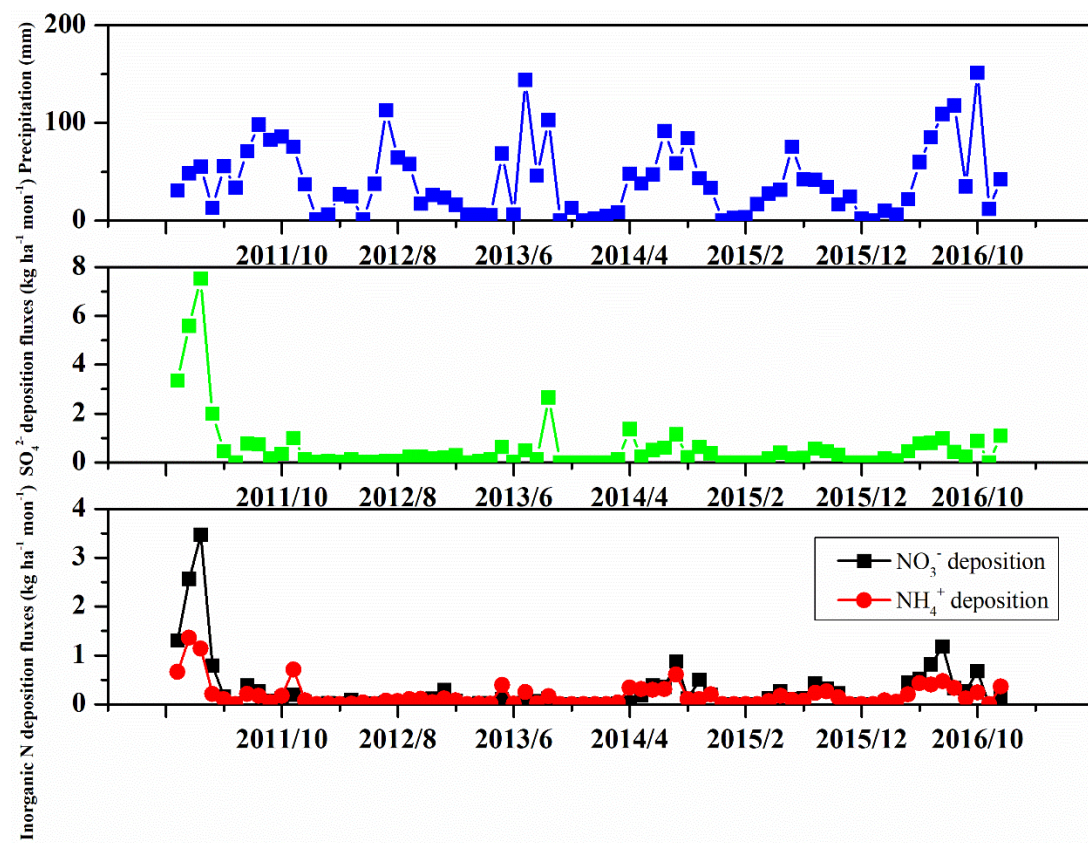

**Fig. S121** The precipitation and wet deposition fluxes of secondary ions in Xuancheng

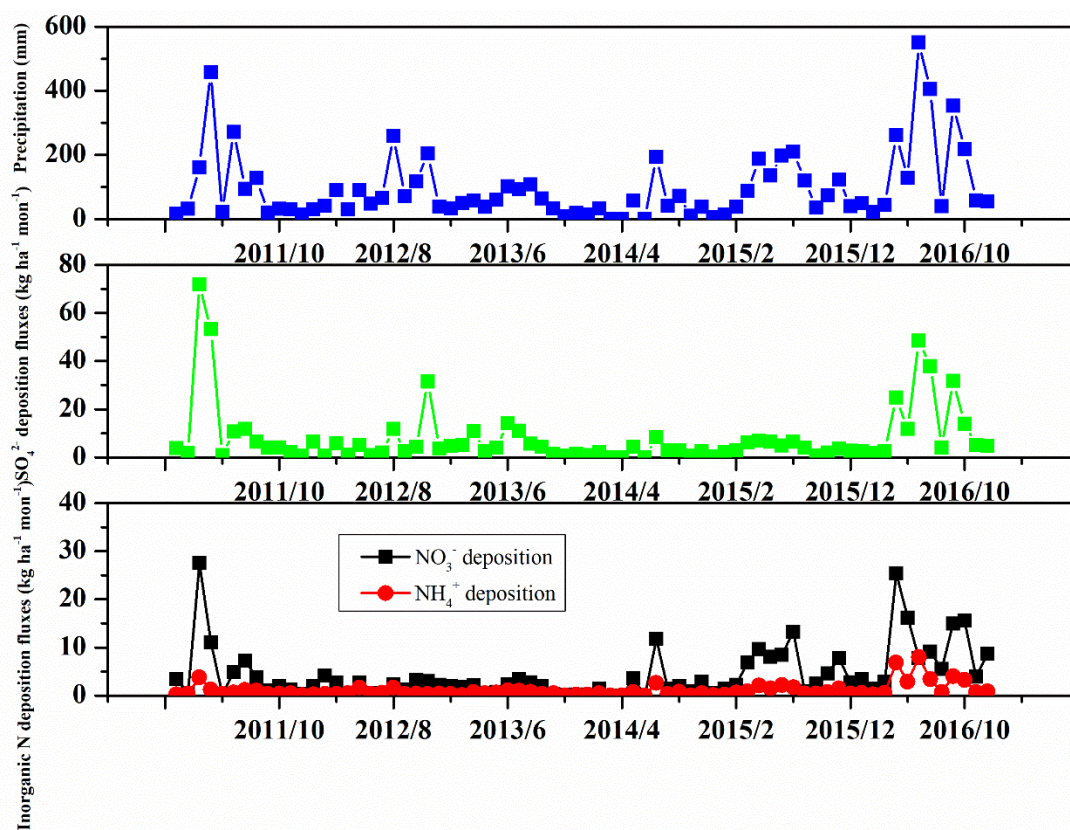

Fig. S122 The precipitation and wet deposition fluxes of secondary ions in Ya'an

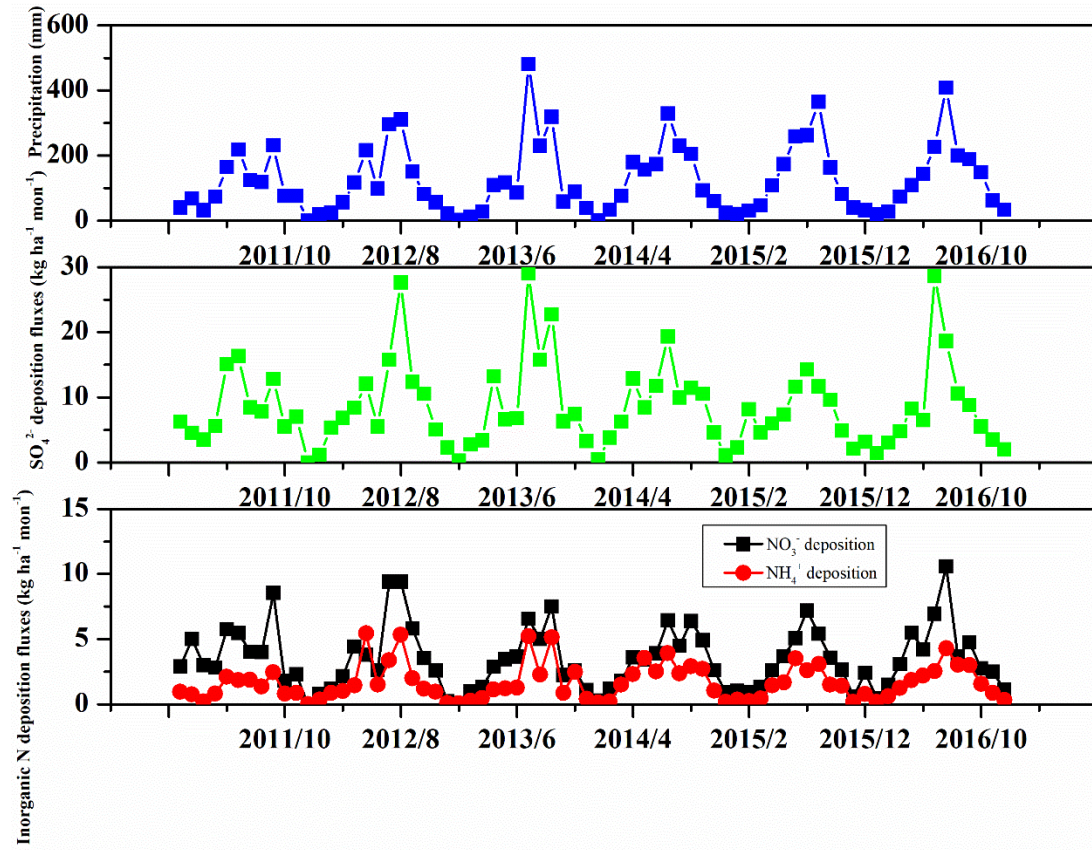

**Fig. S123** The precipitation and wet deposition fluxes of secondary ions in Yancheng

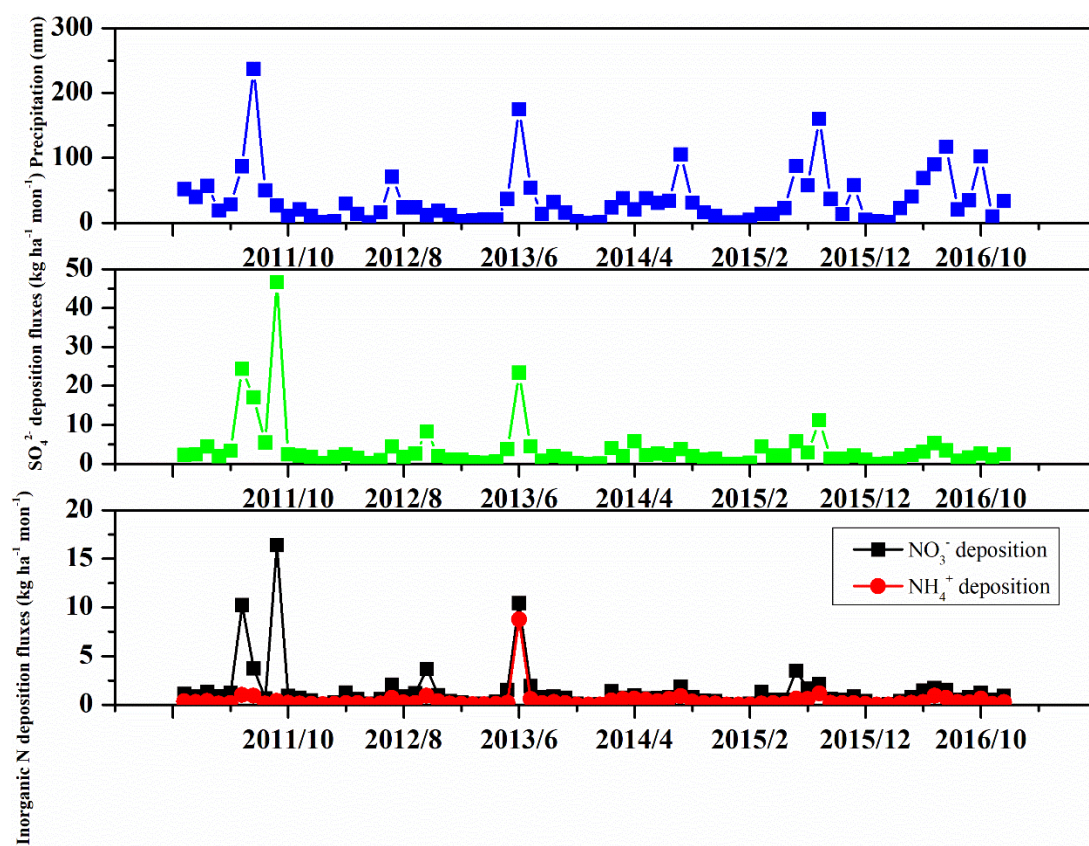

Fig. S124 The precipitation and wet deposition fluxes of secondary ions in Yangzhou

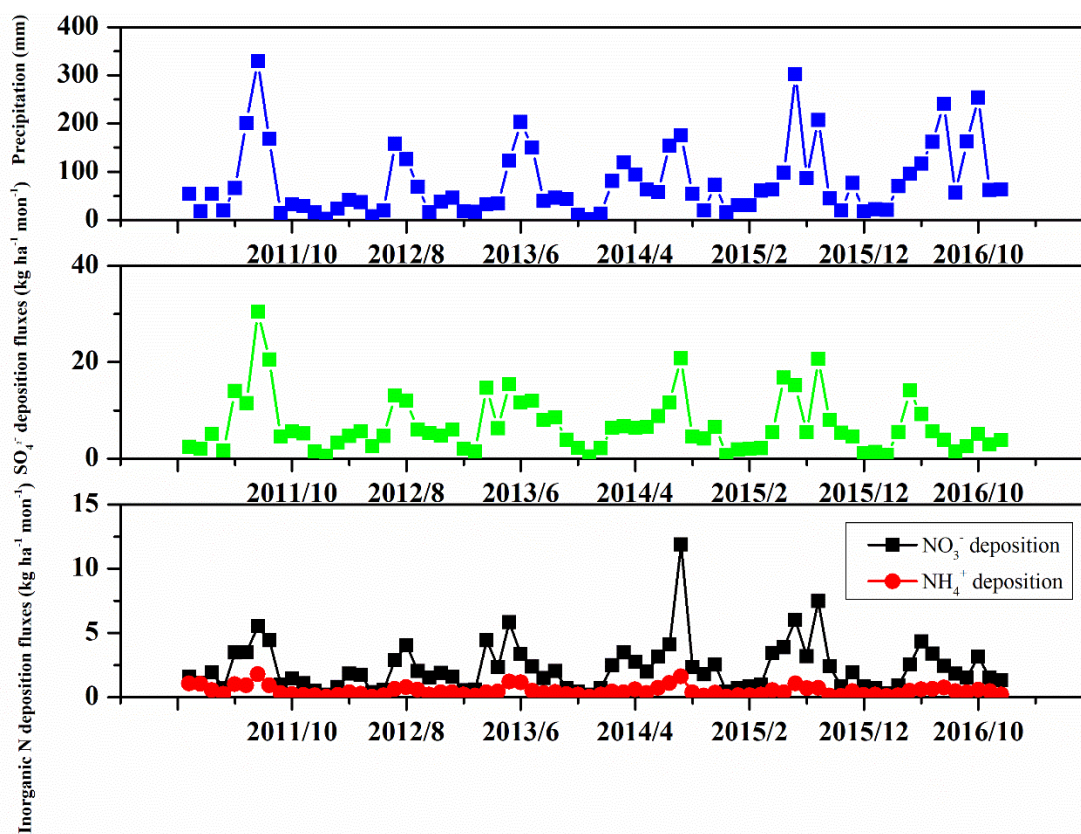

Fig. S125 The precipitation and wet deposition fluxes of secondary ions in Yichun

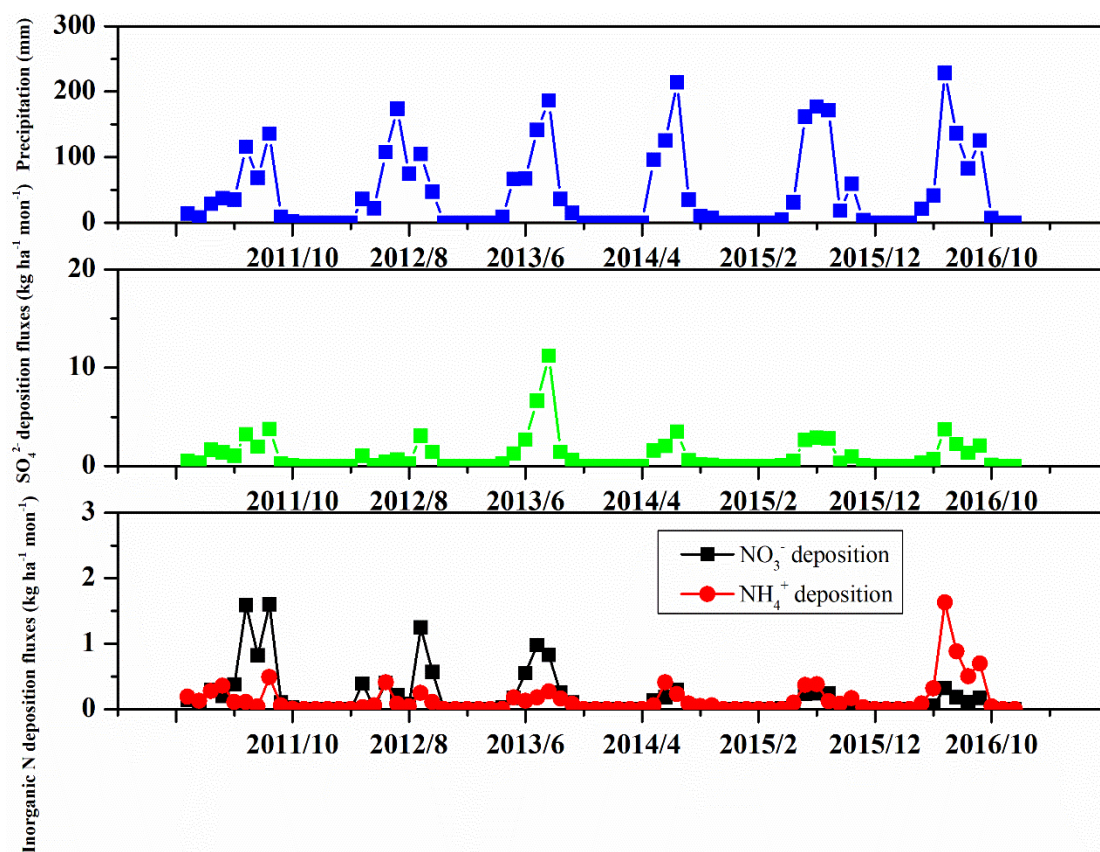



**Fig. S126** The precipitation and wet deposition fluxes of secondary ions in Yili

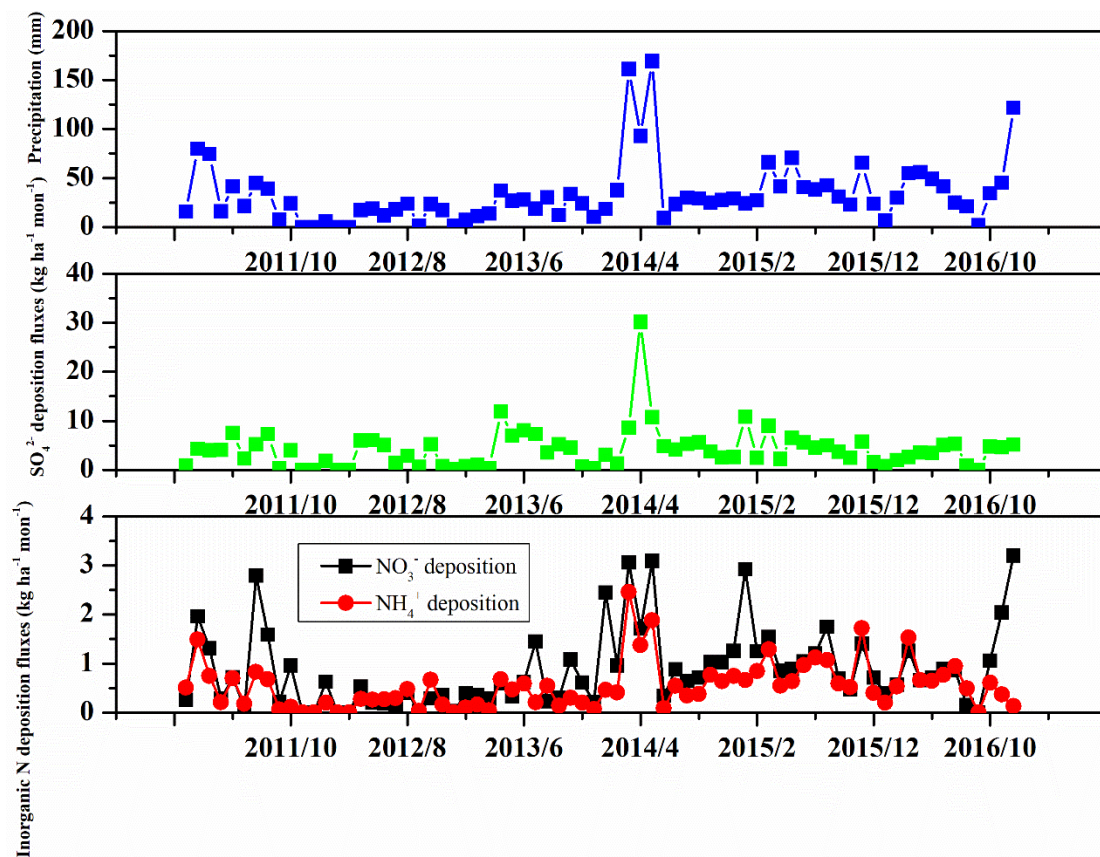

Fig. S127 The precipitation and wet deposition fluxes of secondary ions in Yibin

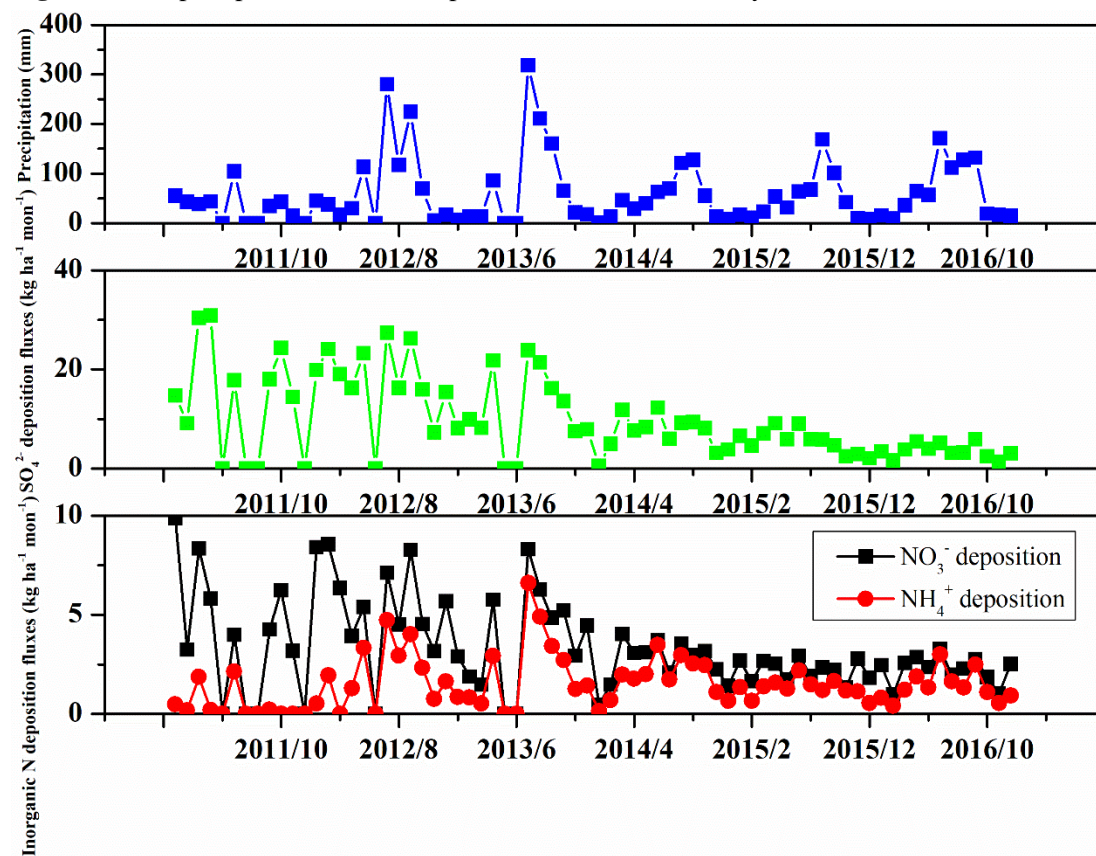

Fig. S128 The precipitation and wet deposition fluxes of secondary ions in Yuncheng

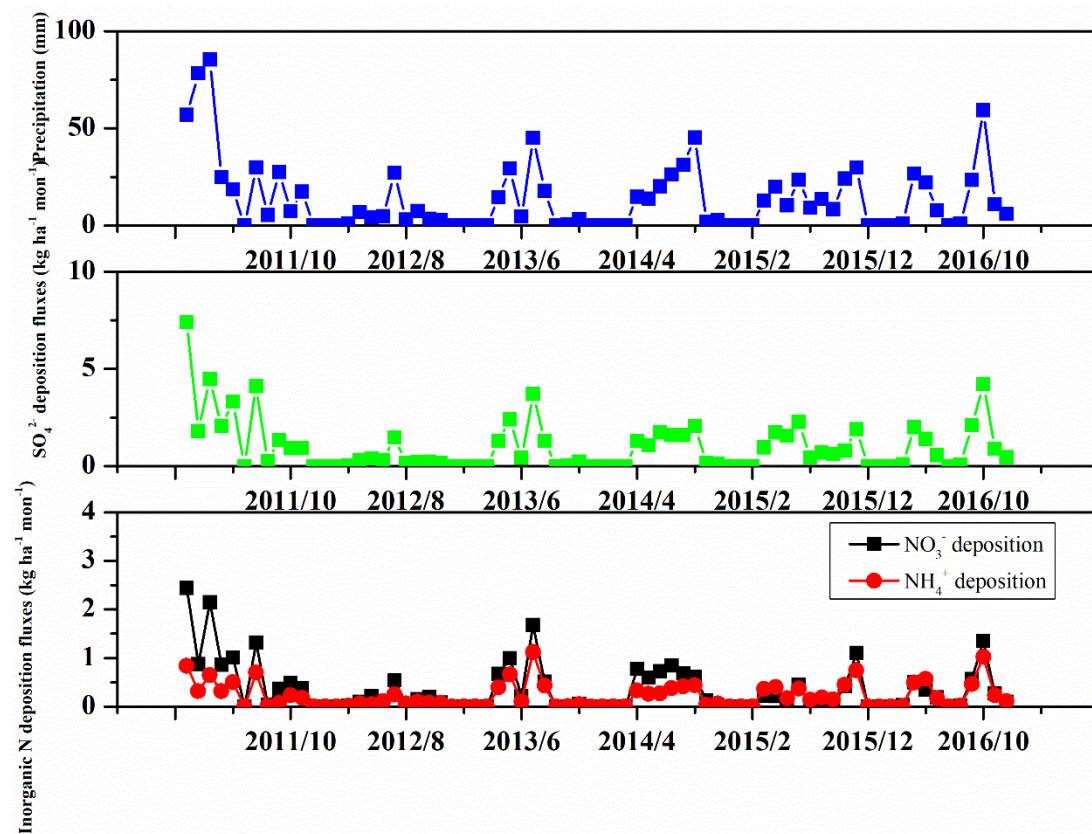

Fig. S129 The precipitation and wet deposition fluxes of secondary ions in Zhangjiakou

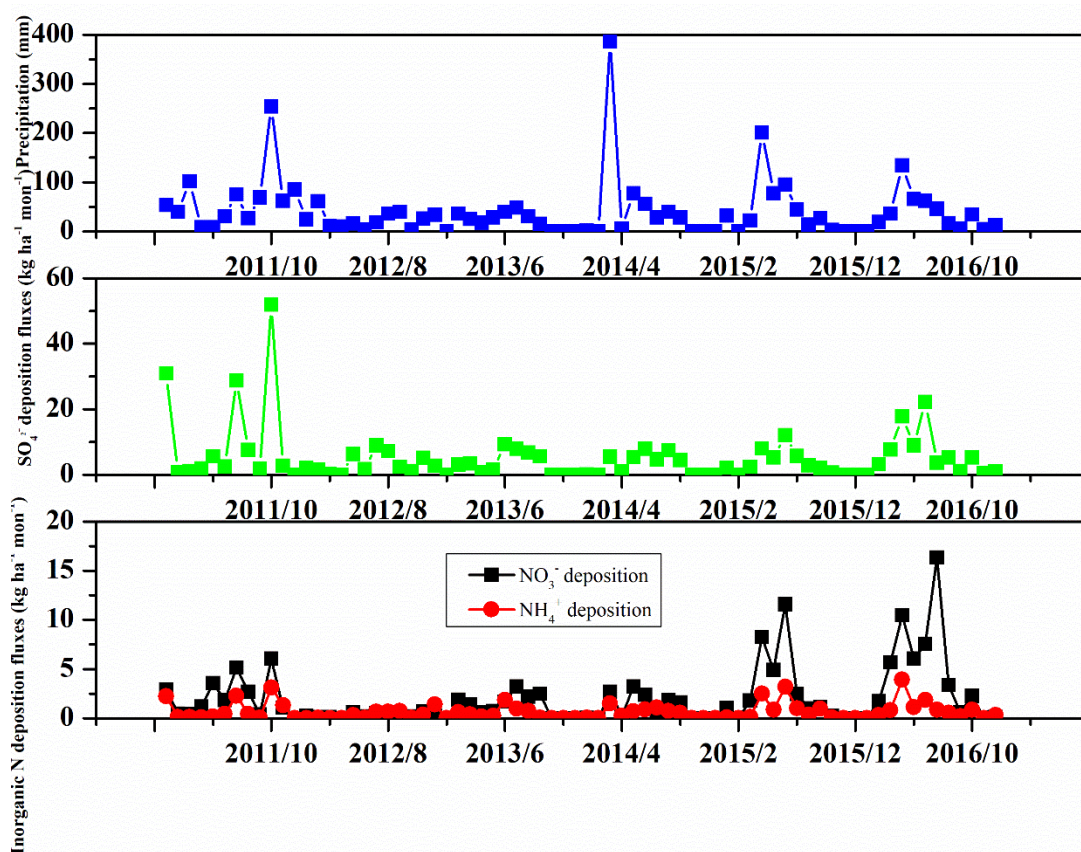

**Fig. S130** The precipitation and wet deposition fluxes of secondary ions in Changzhi

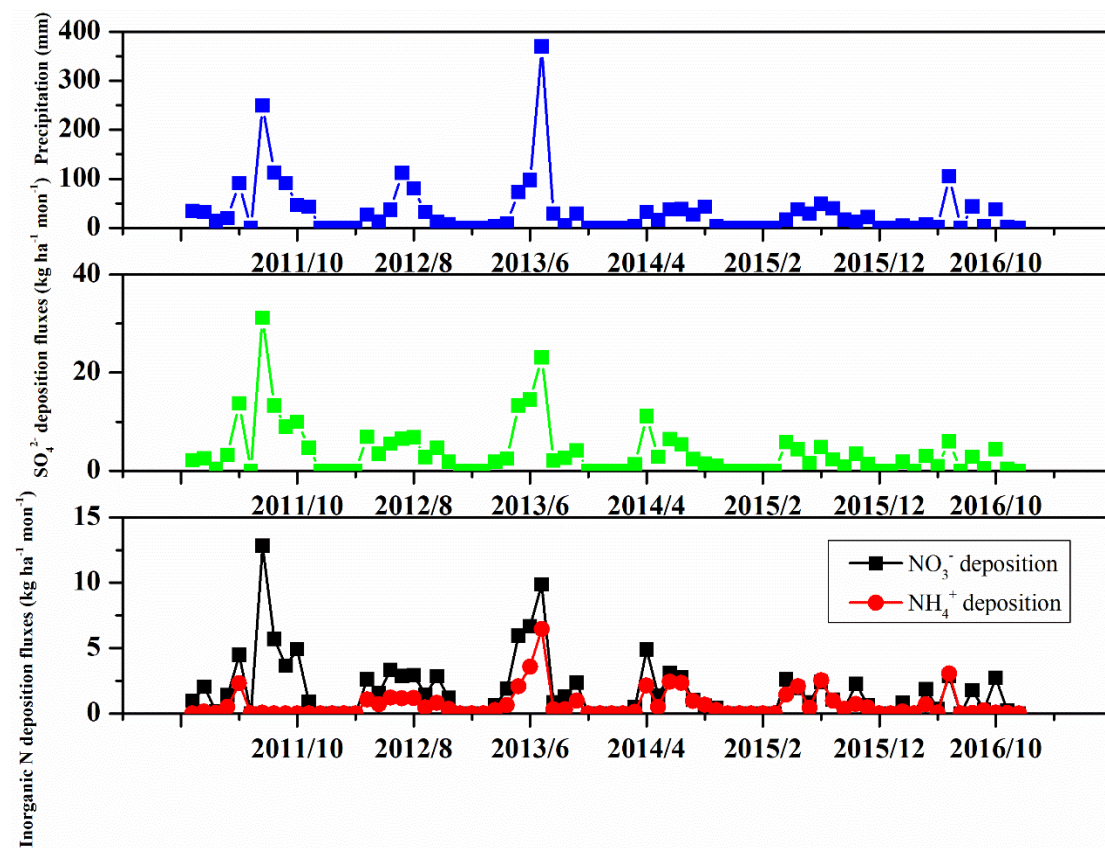

Fig. S131 The precipitation and wet deposition fluxes of secondary ions in Zhengzhou

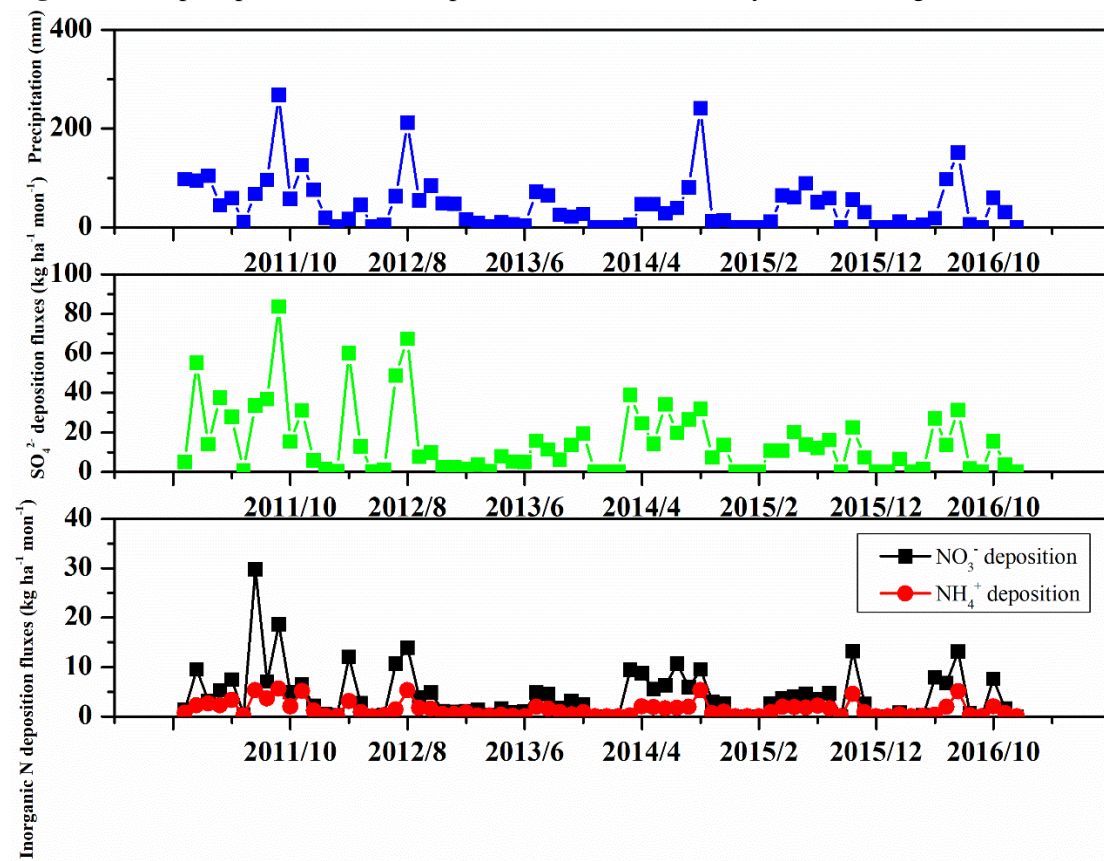

**Fig. S132** The precipitation and wet deposition fluxes of secondary ions in Zhumadian

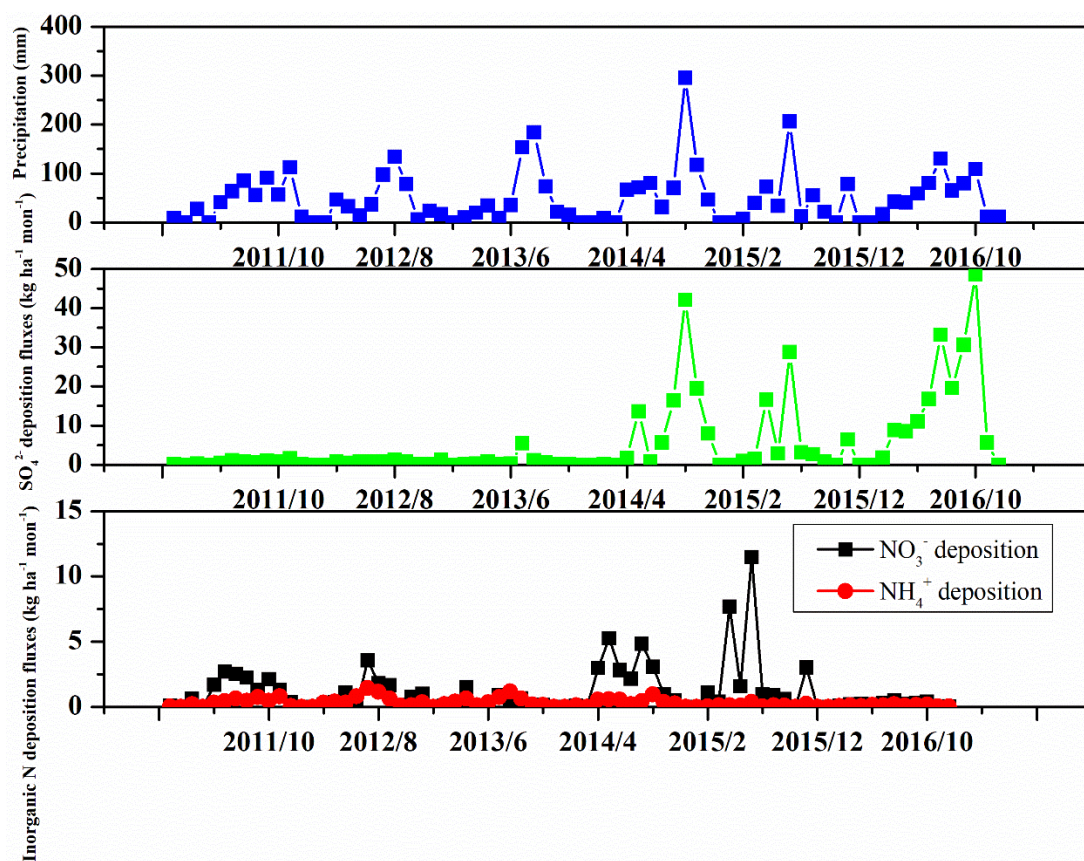

**Fig. S133** The precipitation and wet deposition fluxes of secondary ions in Zunyi

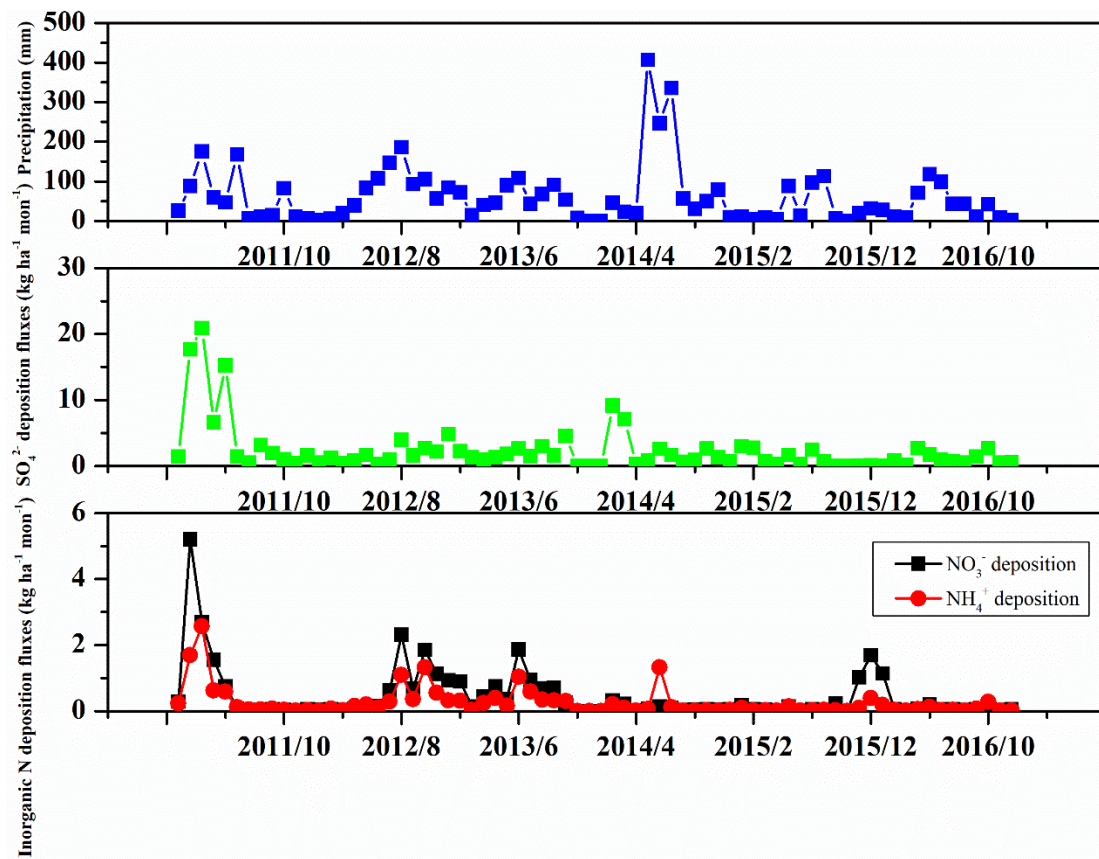



**Fig. S134** The precipitation and wet deposition fluxes of secondary ions in Taizhou

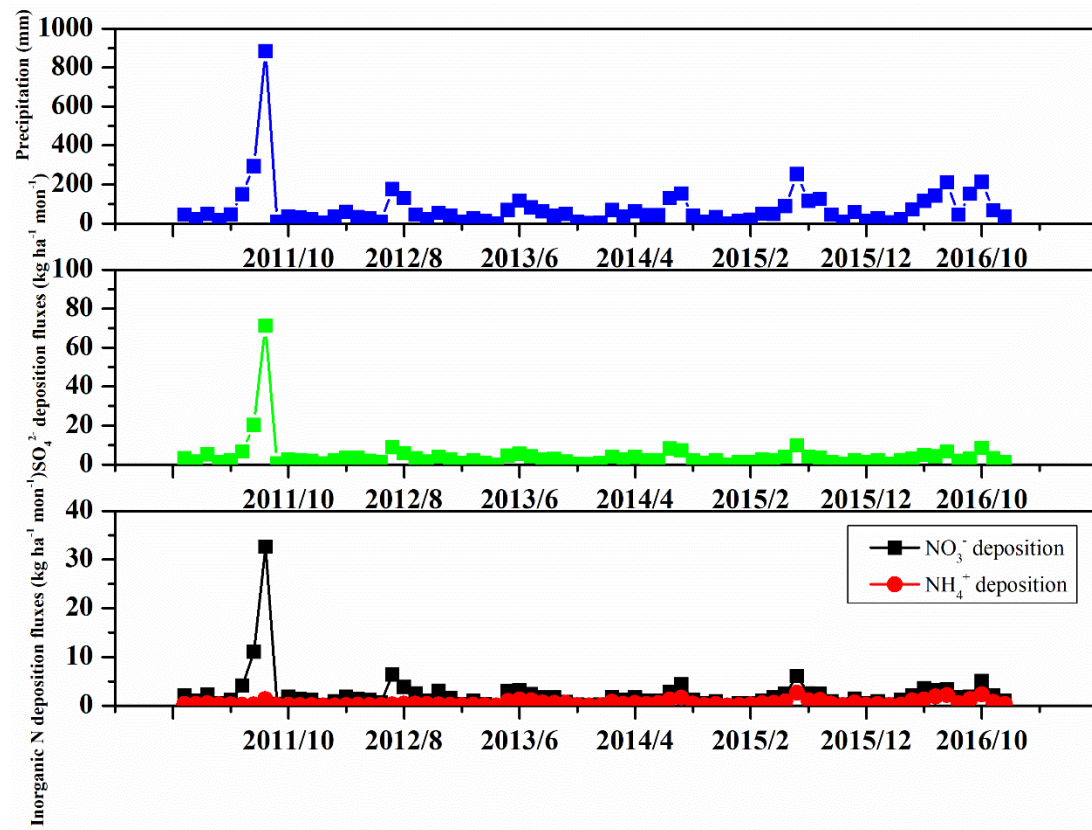

Fig. S135 The precipitation and wet deposition fluxes of secondary ions in Taian

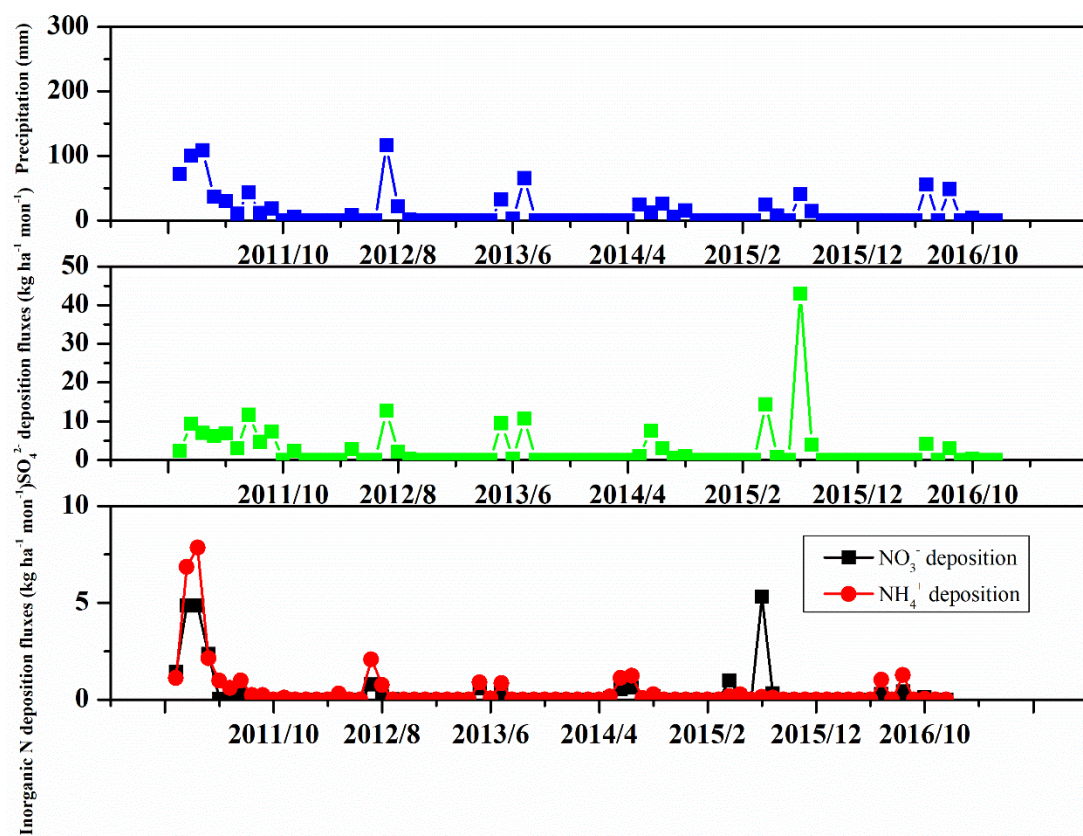

**Fig. S136** The precipitation and wet deposition fluxes of secondary ions in Xilinguole

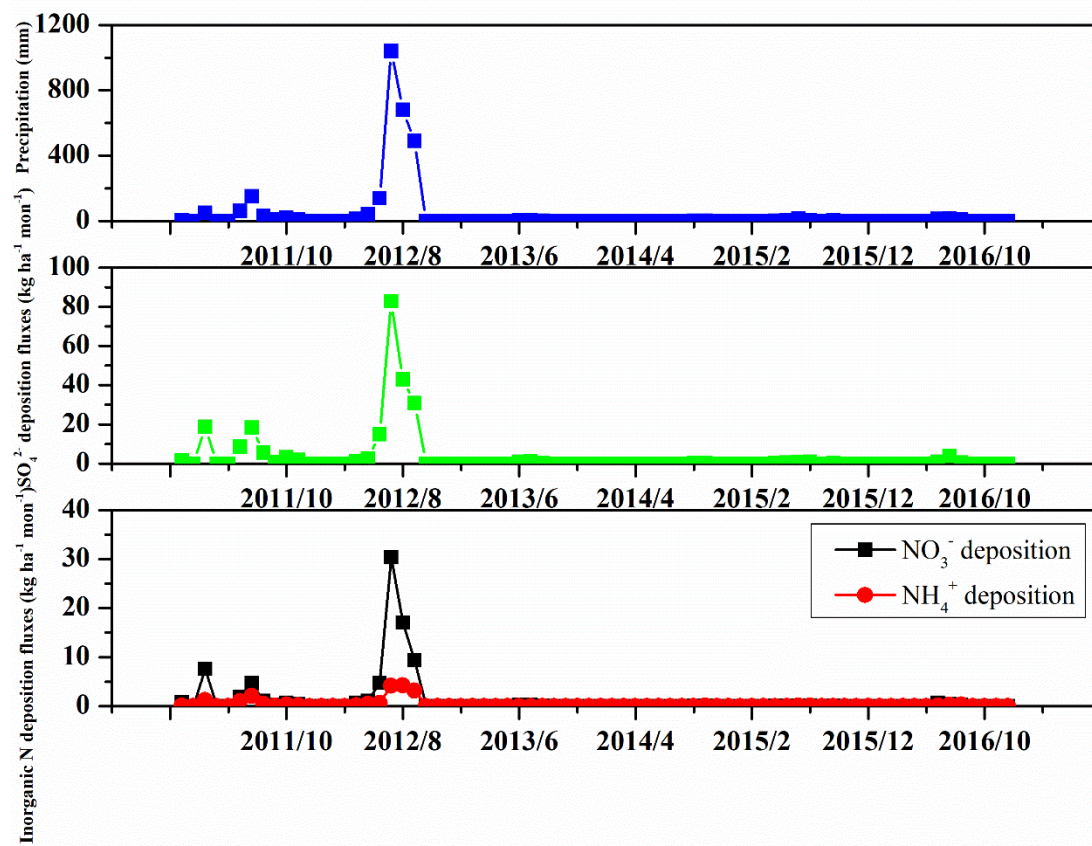

Fig. S137 The precipitation and wet deposition fluxes of secondary ions in Qinhuangdao

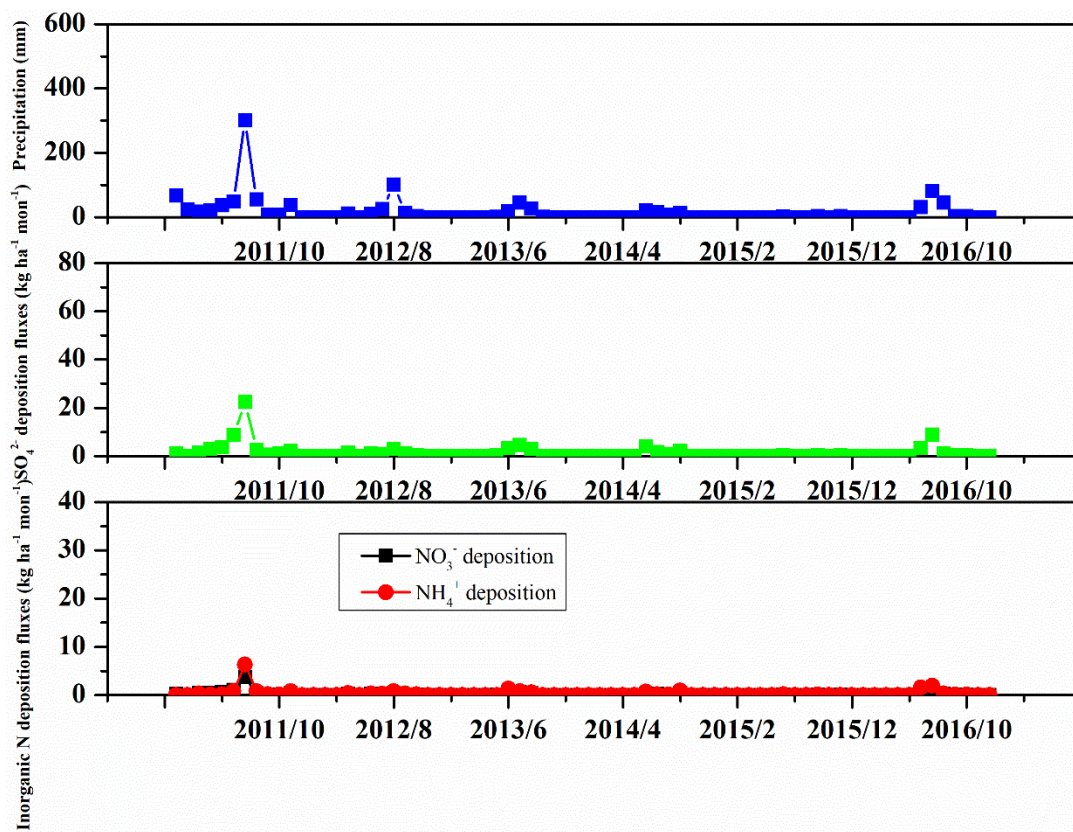

**Fig. S138** The precipitation and wet deposition fluxes of secondary ions in Baotou

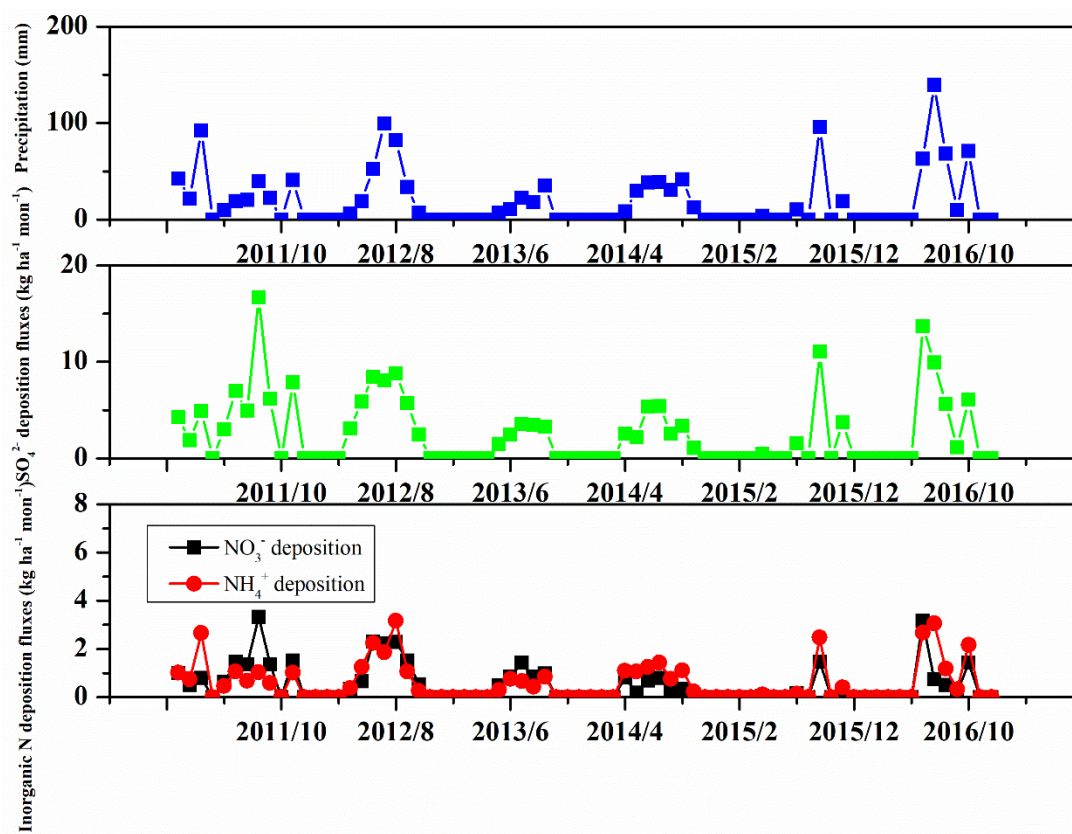

Fig. S139 The precipitation and wet deposition fluxes of secondary ions in Qingdao

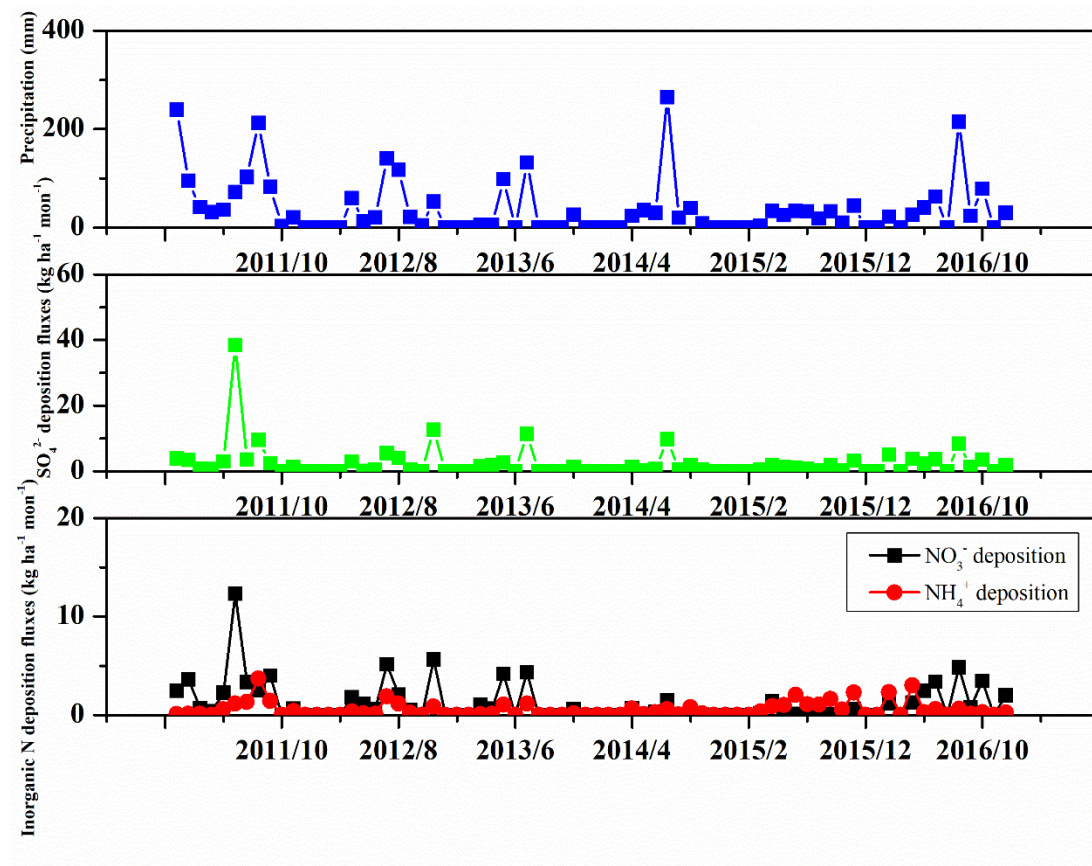

Fig. S140 The precipitation and wet deposition fluxes of secondary ions in Ziyang

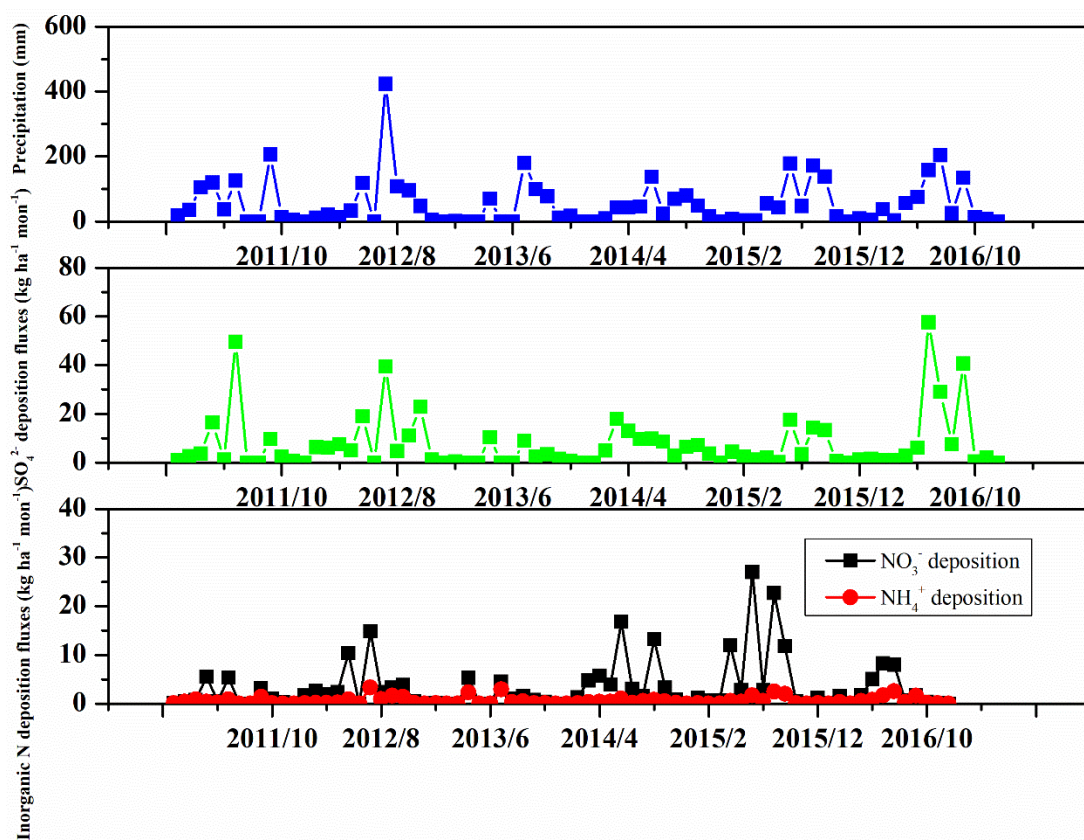

Fig. S141 The precipitation and wet deposition fluxes of secondary ions in Lincang

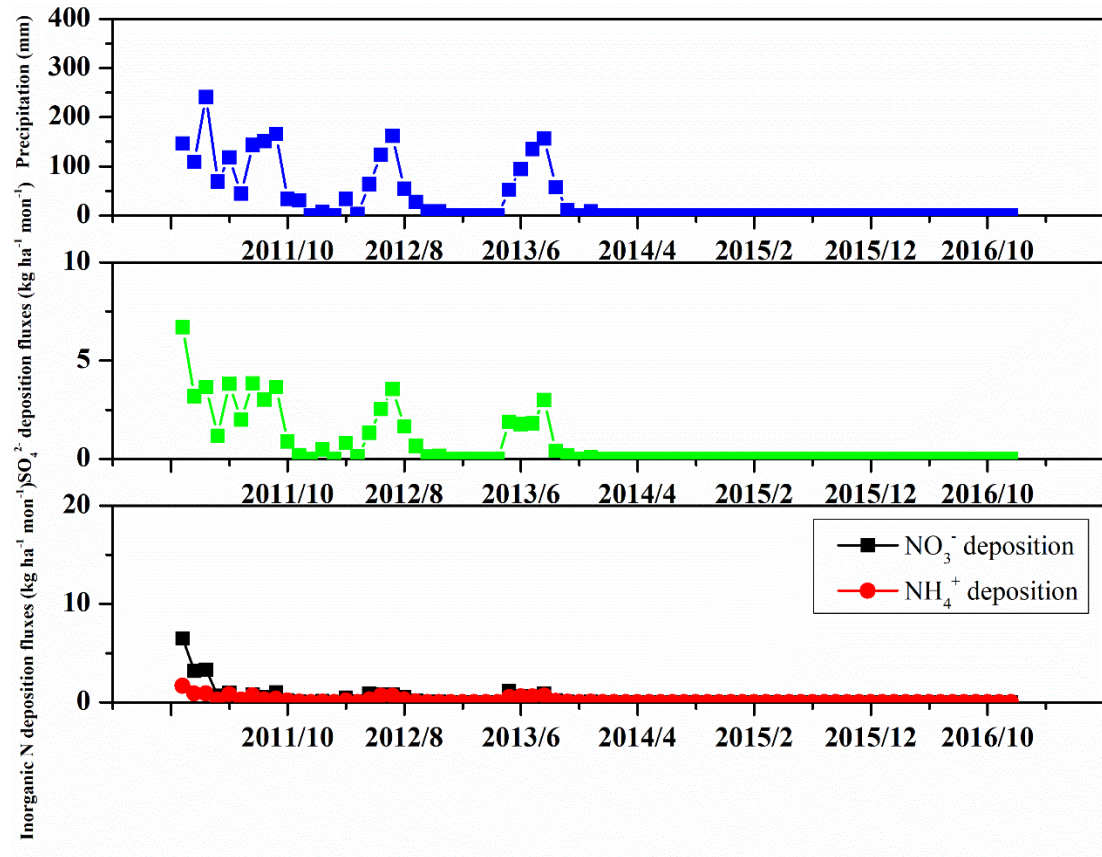



Fig. S142 The precipitation and wet deposition fluxes of secondary ions in Guangan

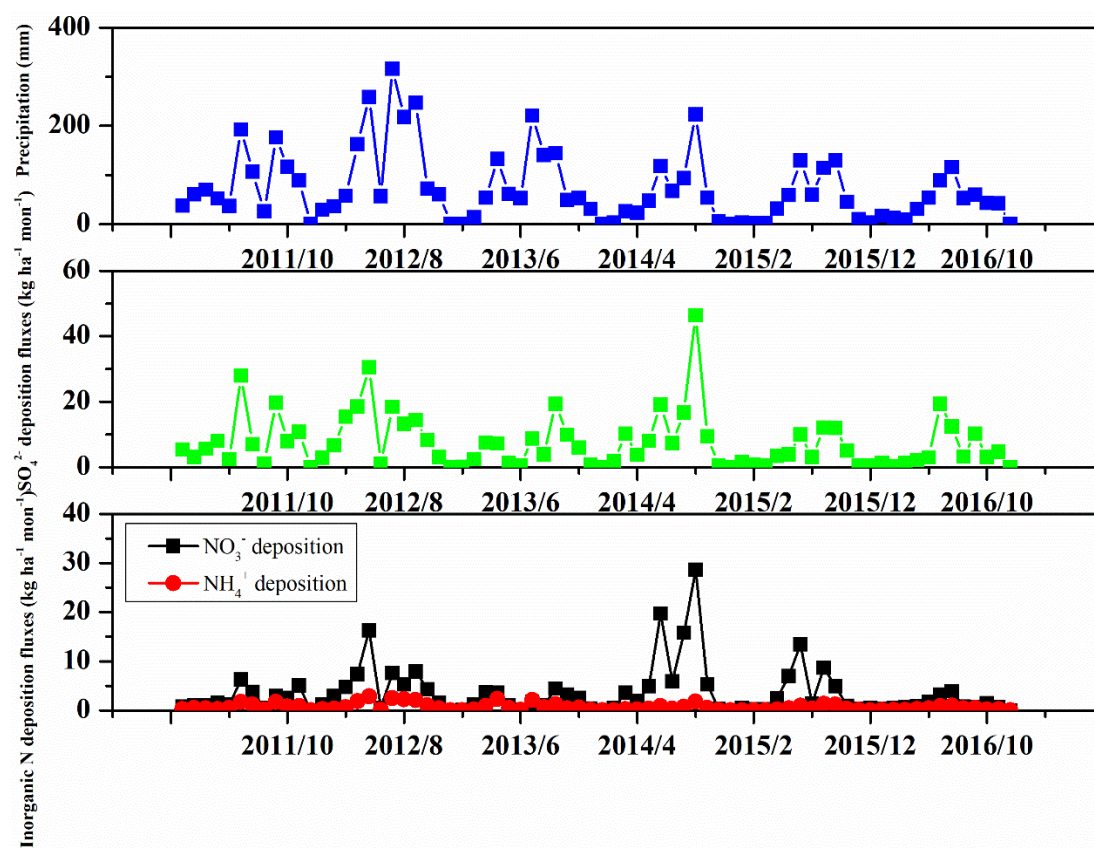

**Fig. S143** The precipitation and wet deposition fluxes of secondary ions in Huludao

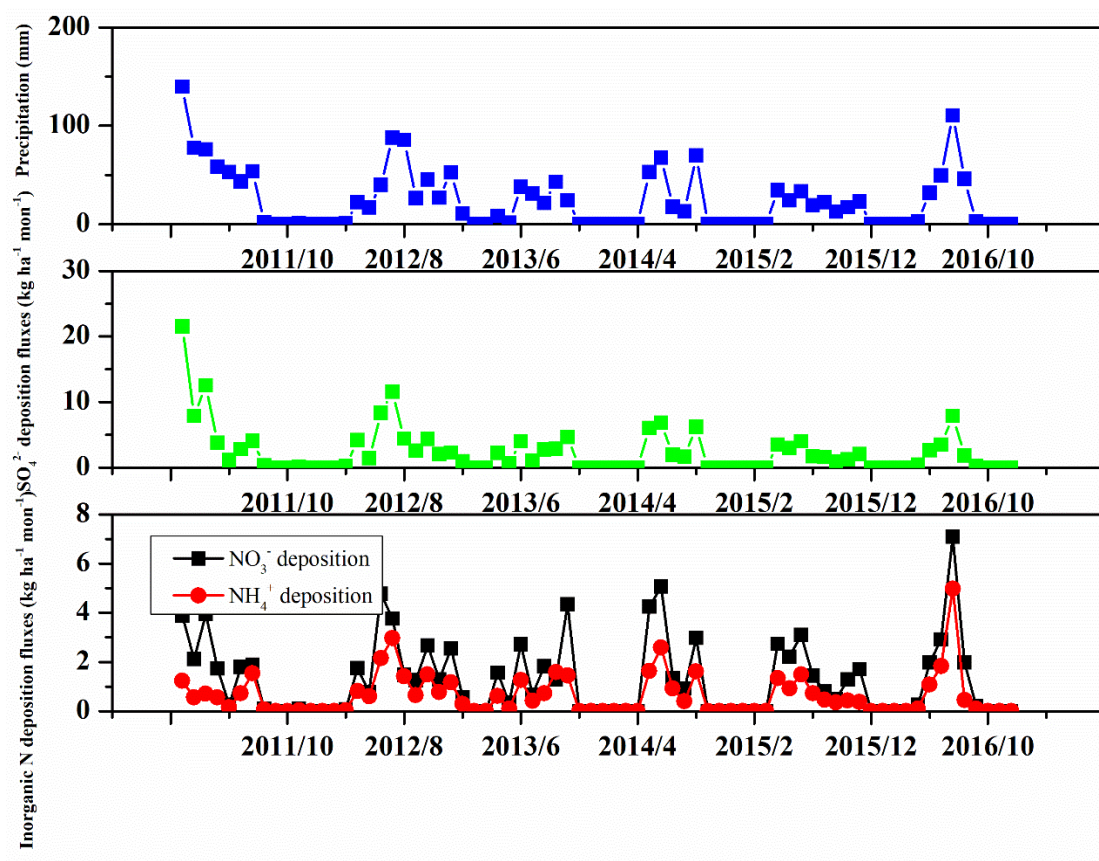

**Fig. S144** The precipitation and wet deposition fluxes of secondary ions in Panjin

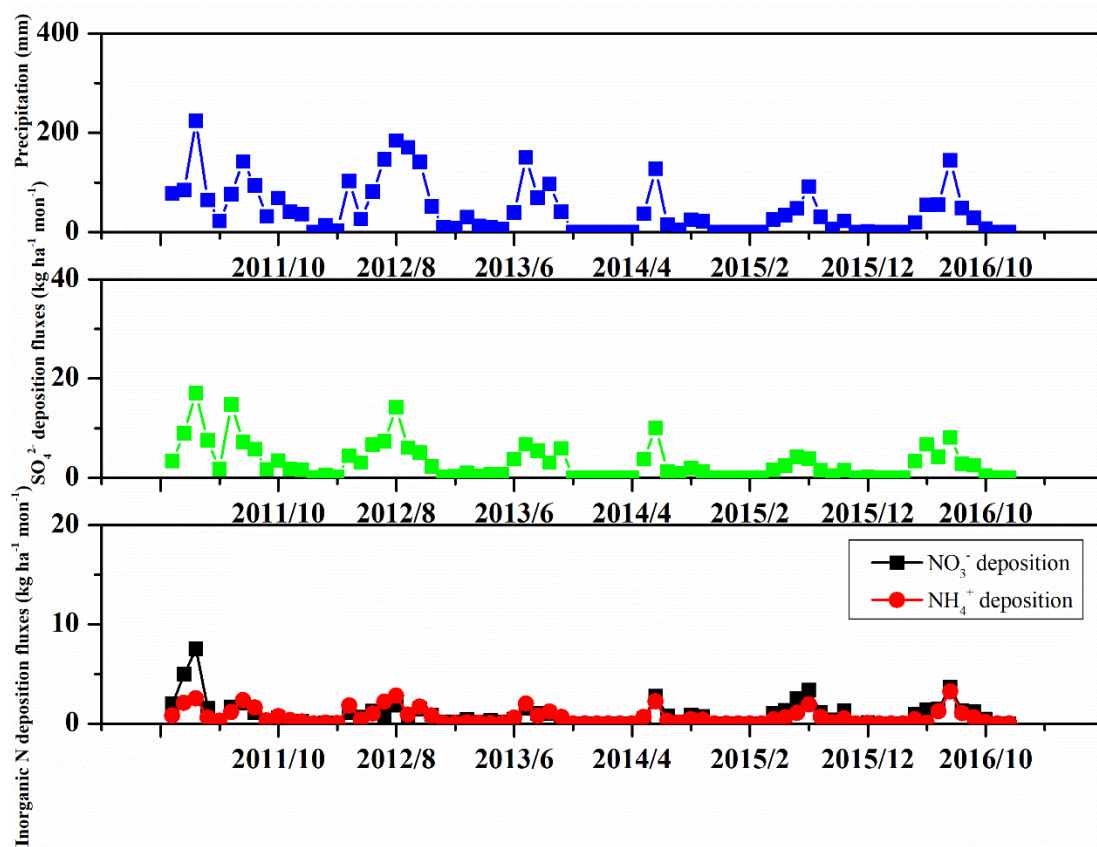

Fig. S145 The precipitation and wet deposition fluxes of secondary ions in Luohe

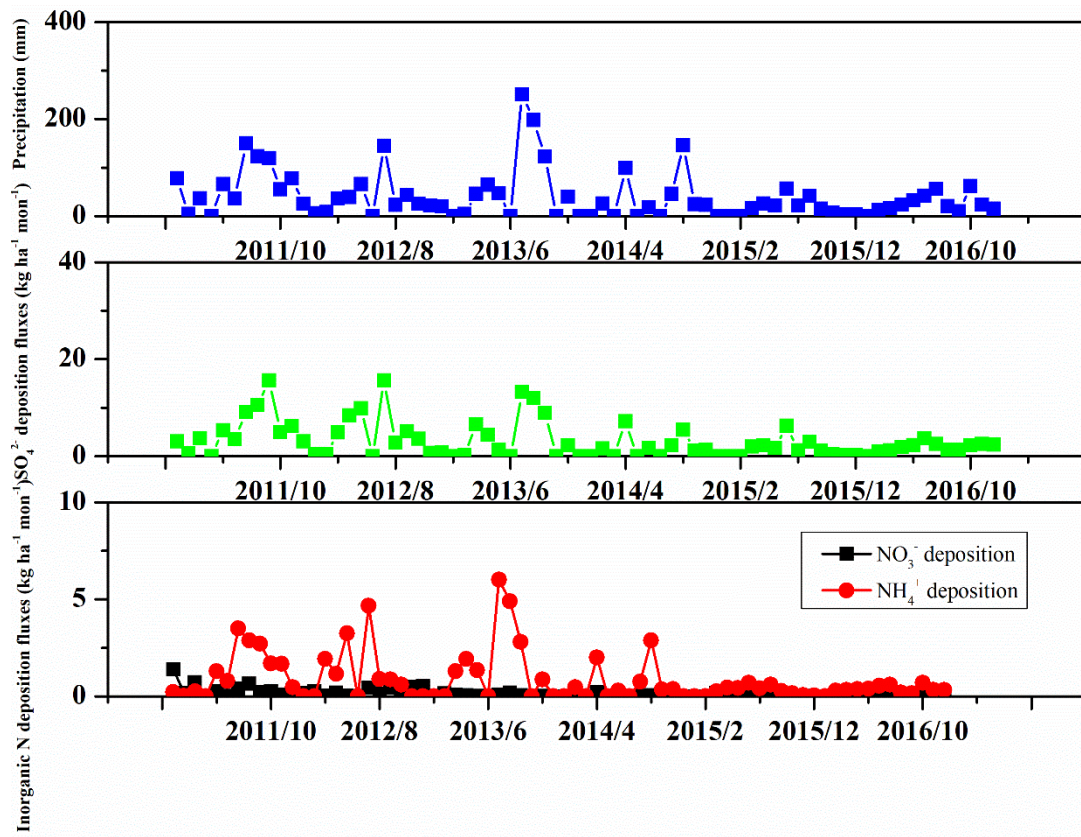

Fig. S146 The precipitation and wet deposition fluxes of secondary ions in Huainan

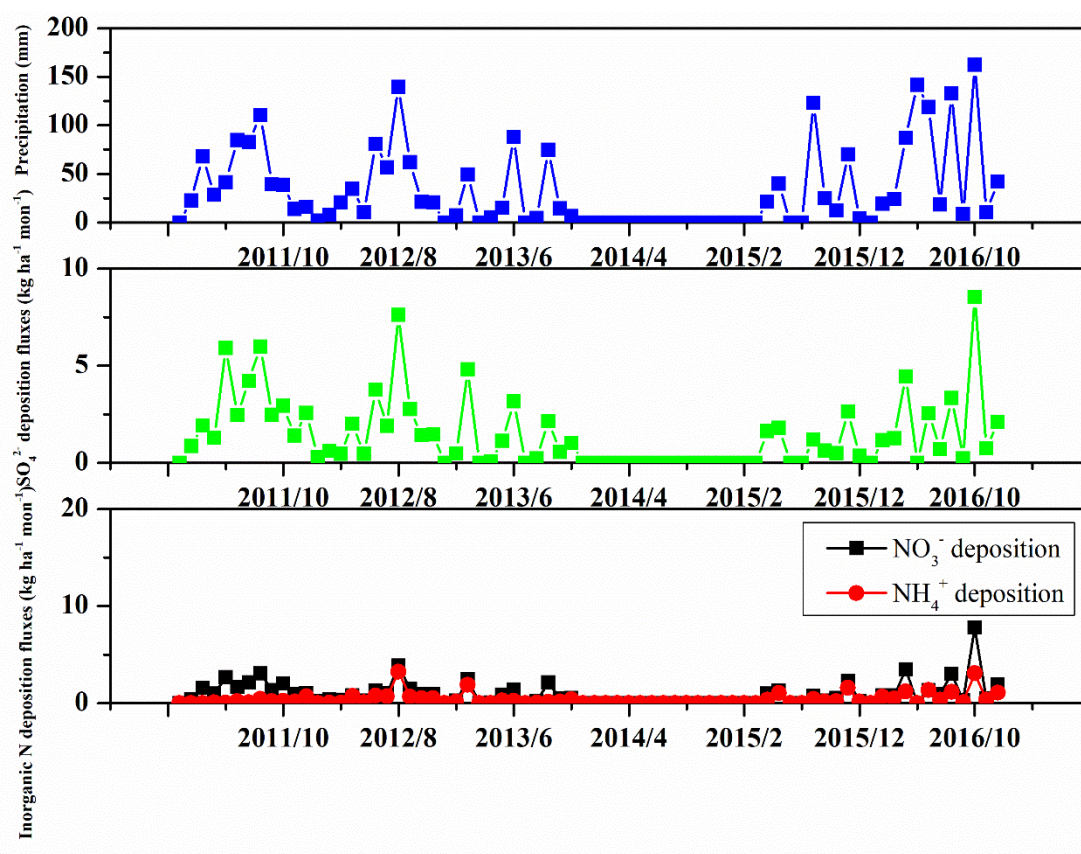

**Fig. S147** The precipitation and wet deposition fluxes of secondary ions in Baoding

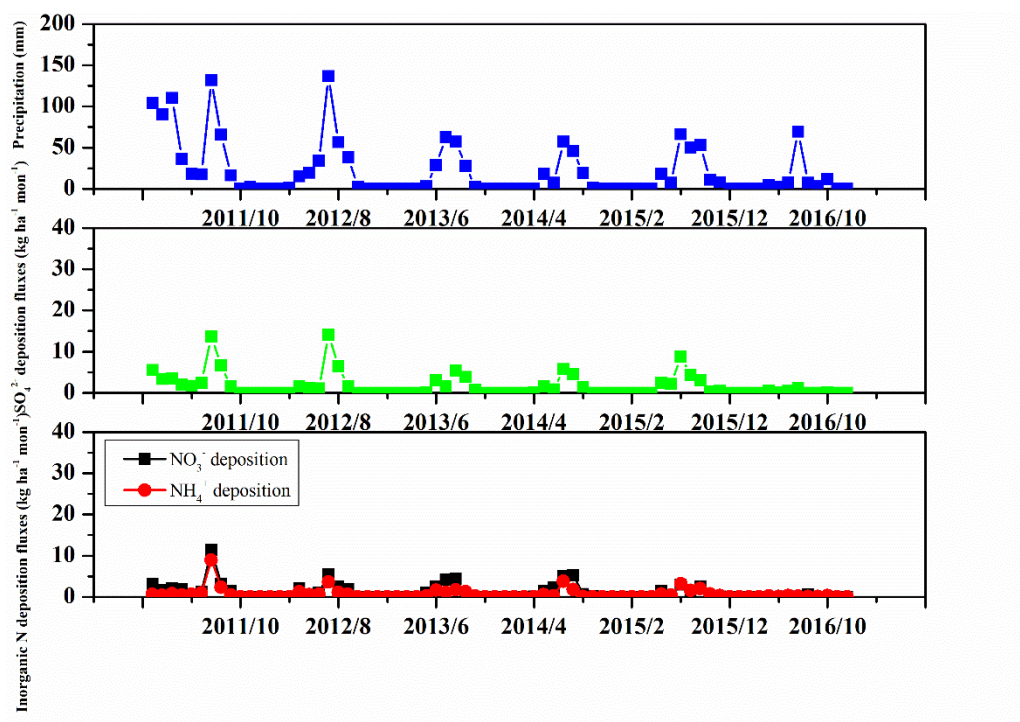

**Fig. S148** The precipitation and wet deposition fluxes of secondary ions in Nanping

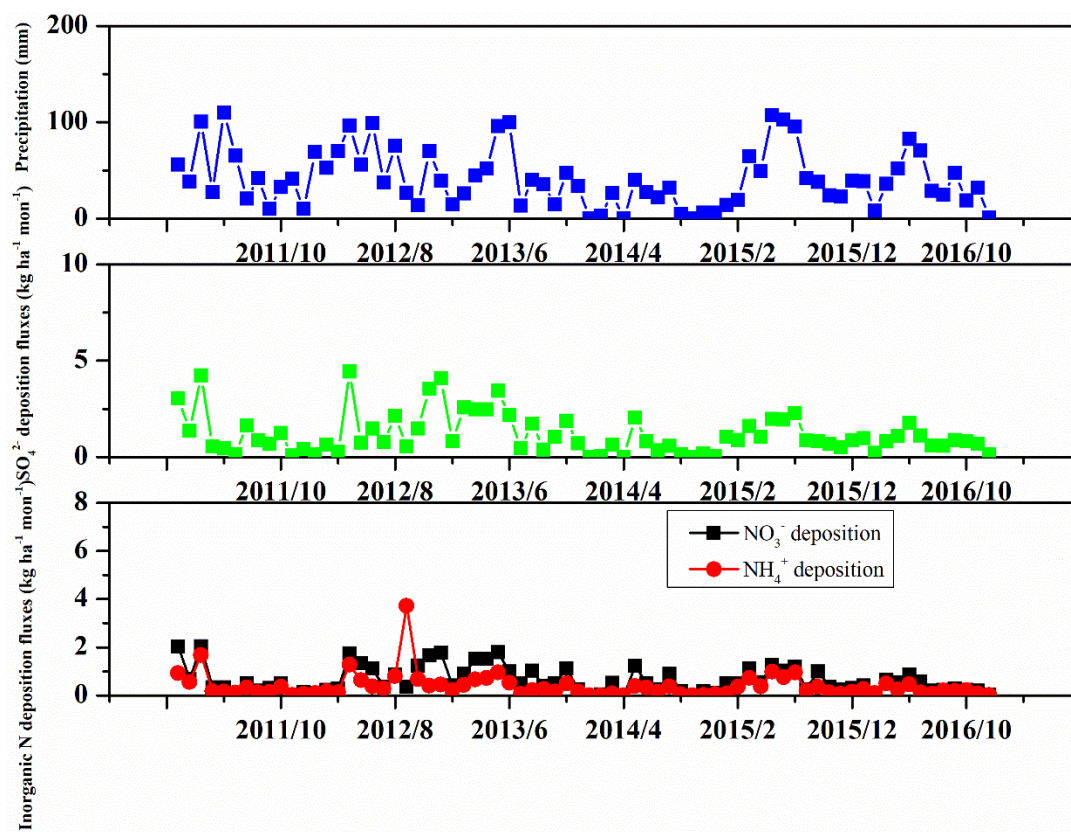

Fig. S149 The precipitation and wet deposition fluxes of secondary ions in Bazhong

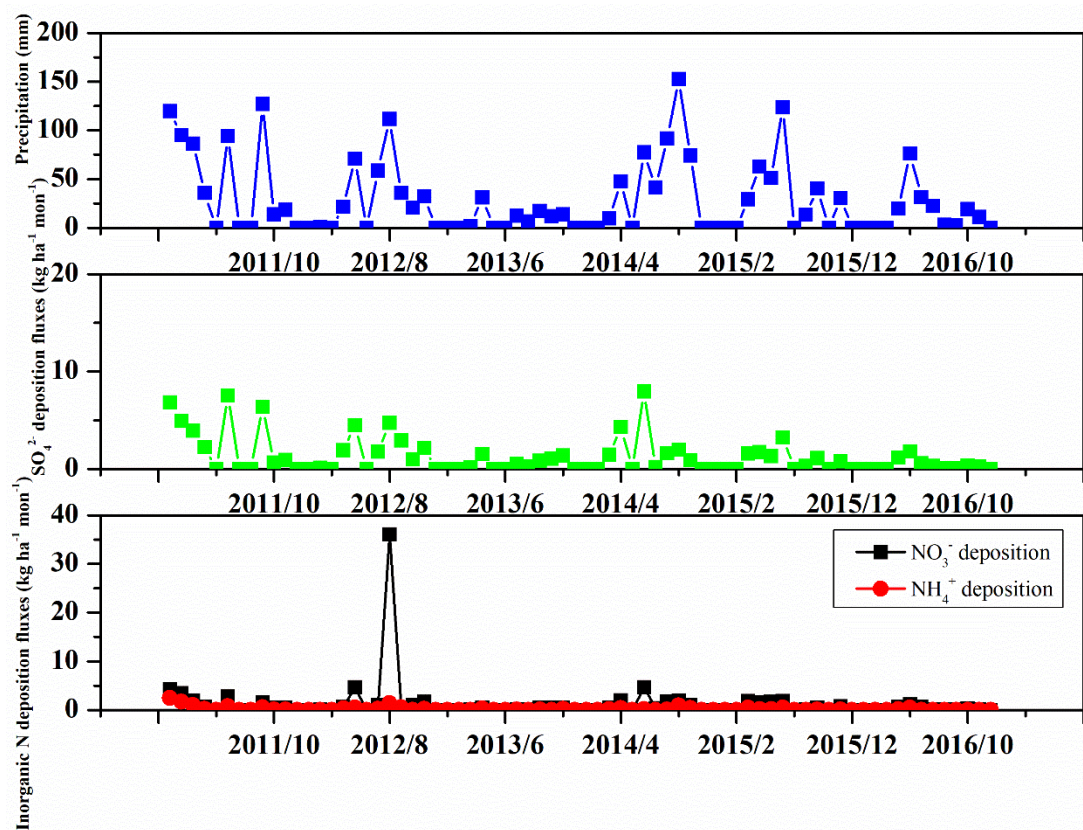



Fig. S150 The precipitation and wet deposition fluxes of secondary ions in Ningde

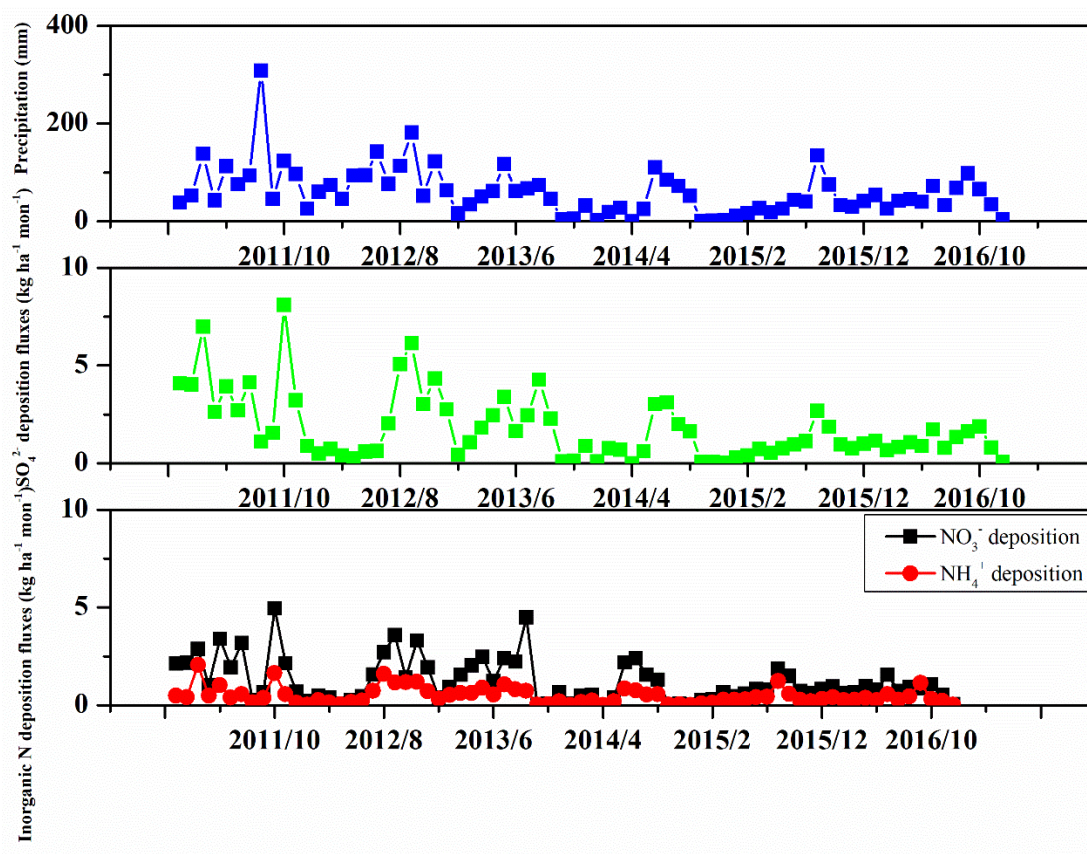

**Fig. S151** The precipitation and wet deposition fluxes of secondary ions in Putian

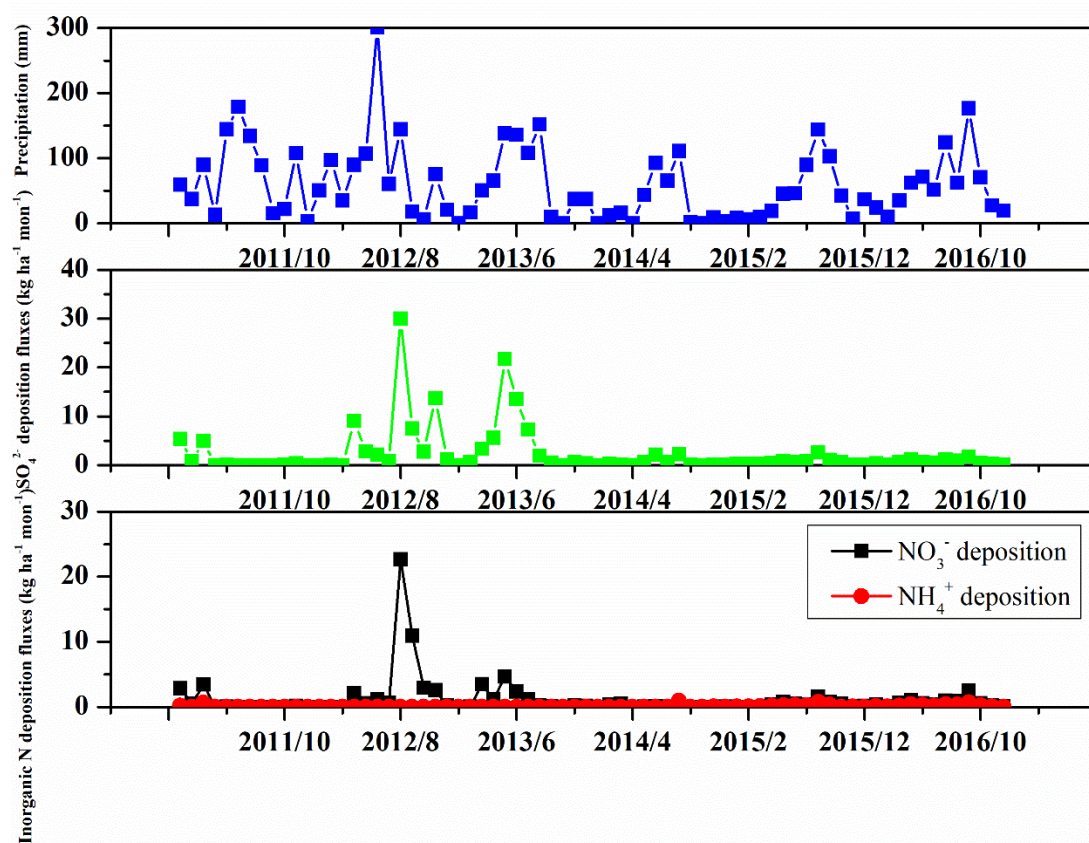

Fig. S152 The precipitation and wet deposition fluxes of secondary ions in Puer

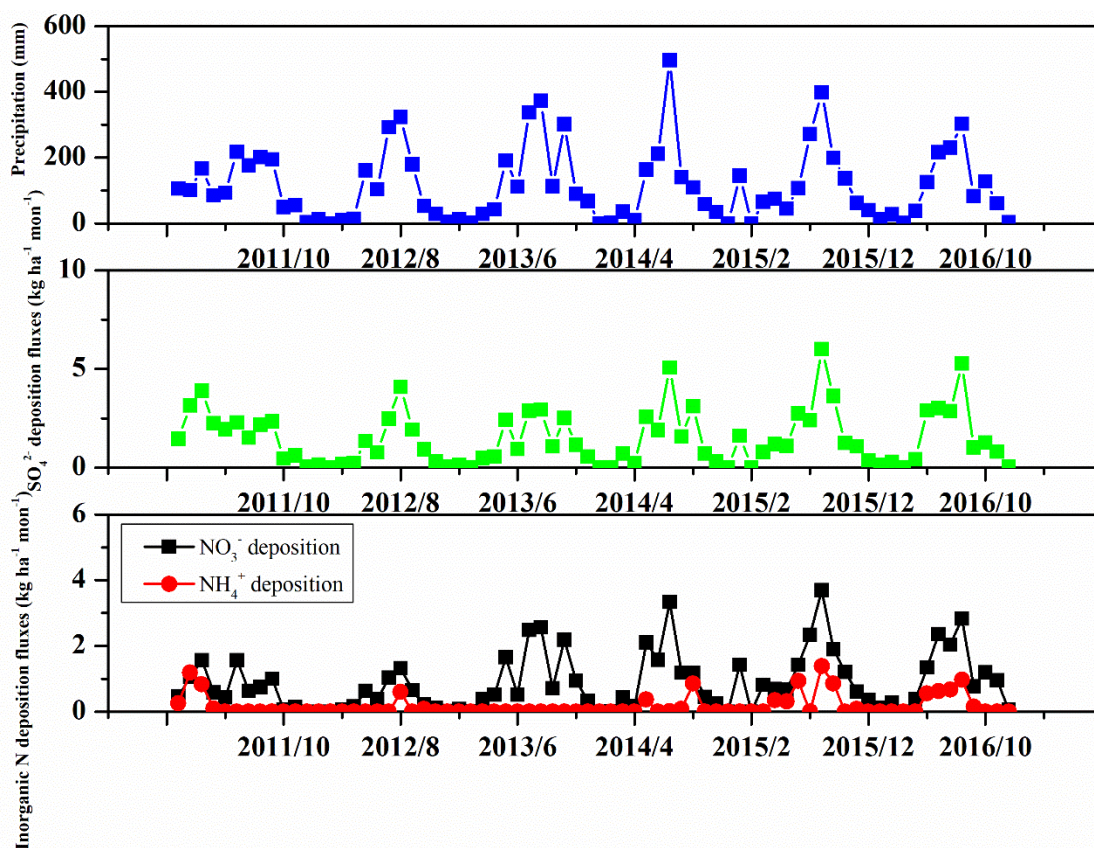

**Fig. S153** The precipitation and wet deposition fluxes of secondary ions in Hebi

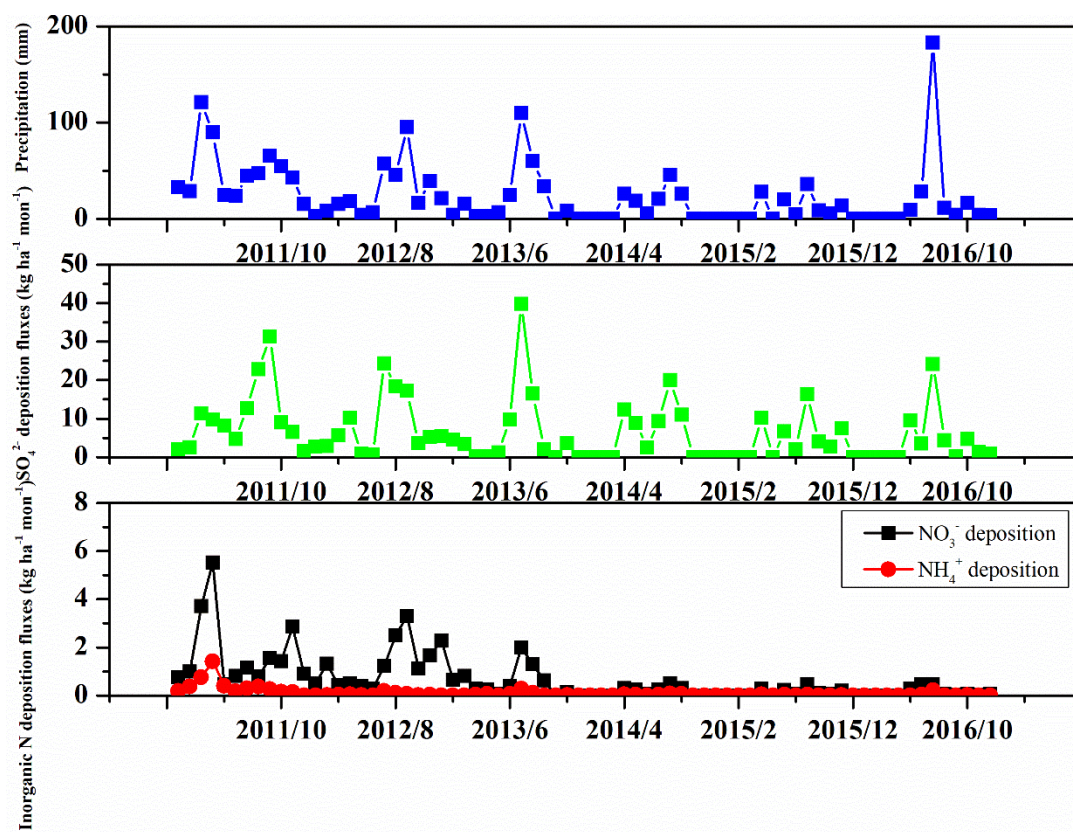

Fig. S154 The precipitation and wet deposition fluxes of secondary ions in Karamay

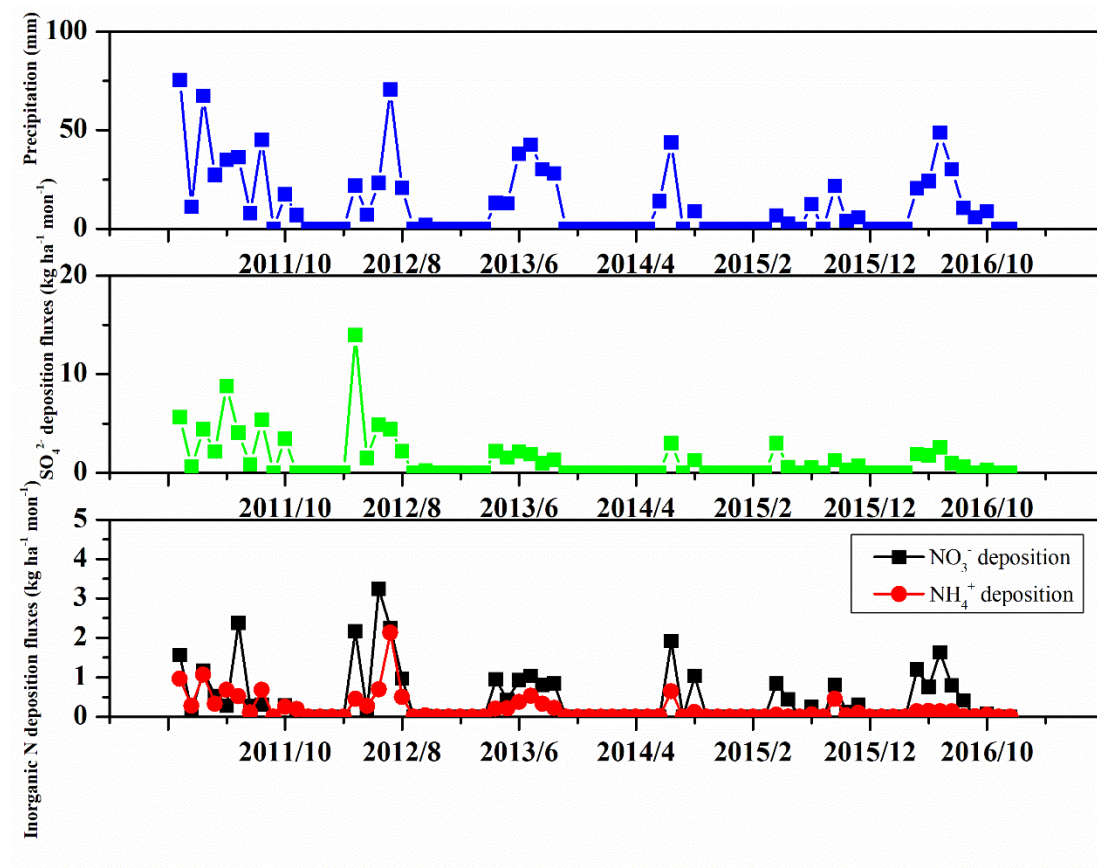

**Fig. S155** The precipitation and wet deposition fluxes of secondary ions in Hami

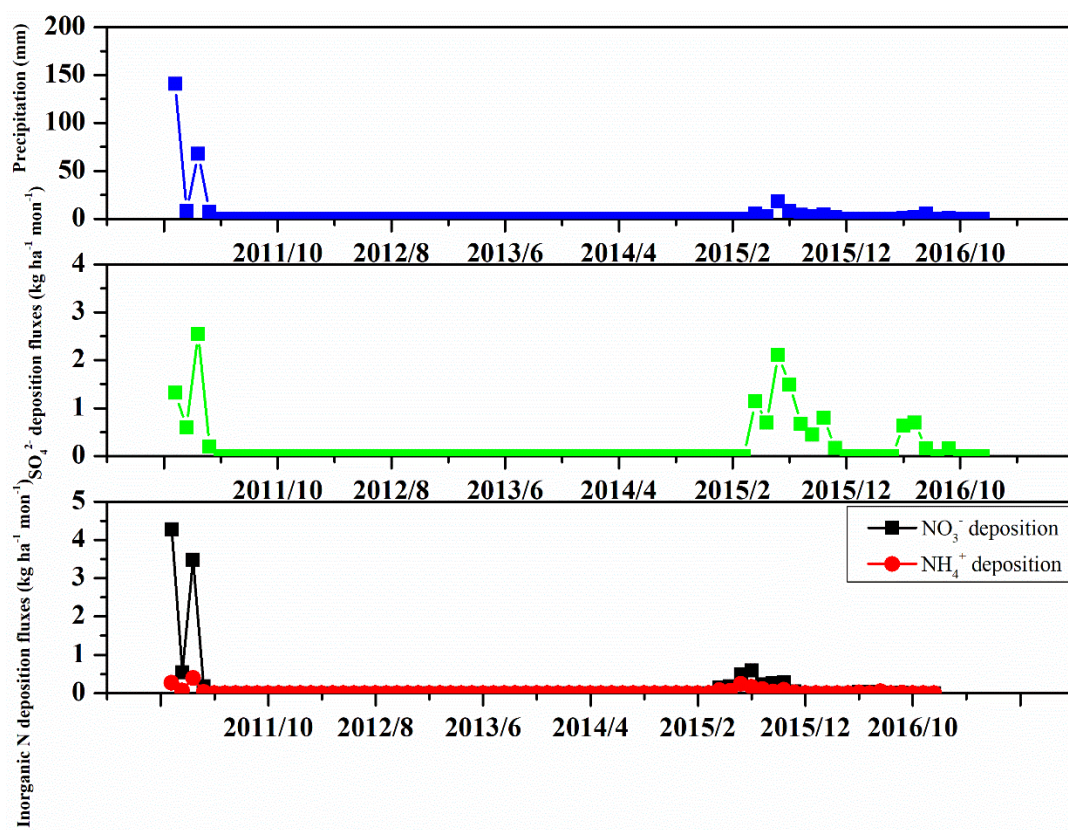

Fig. S156 The precipitation and wet deposition fluxes of secondary ions in Weihai

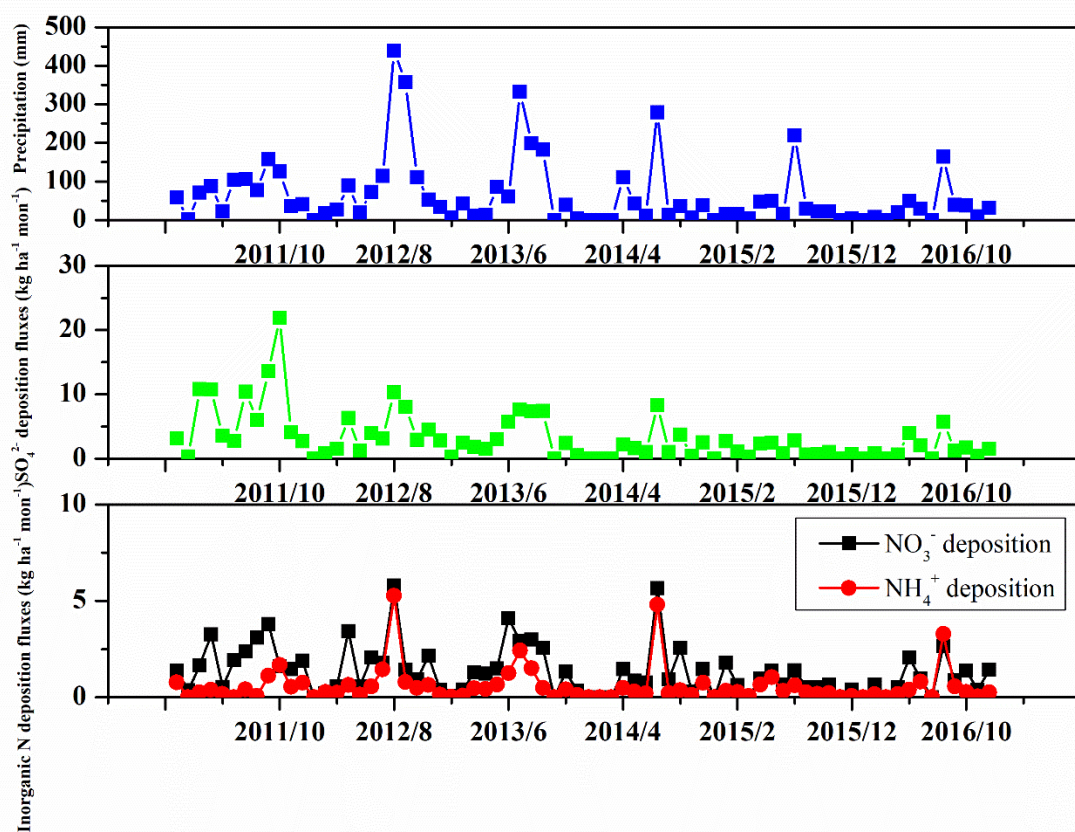

Fig. S157 The precipitation and wet deposition fluxes of secondary ions in Lhasa

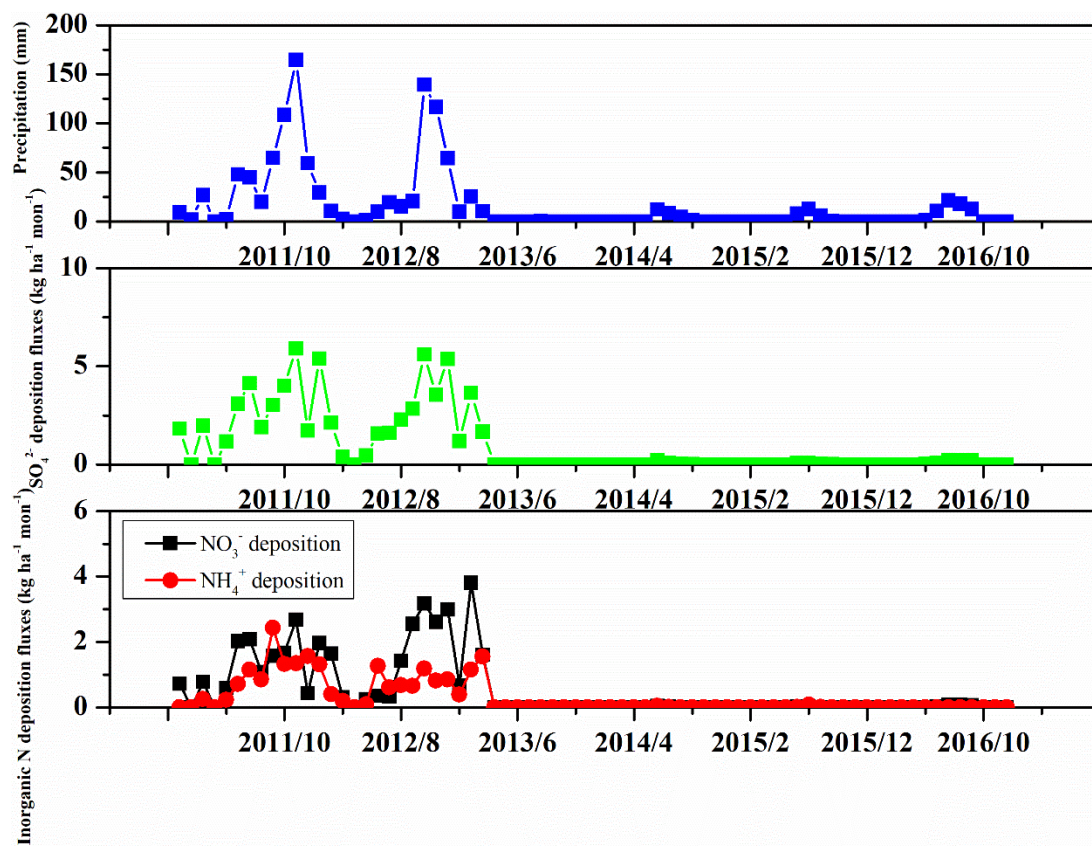



Fig. S158 The precipitation and wet deposition fluxes of secondary ions in Qujing

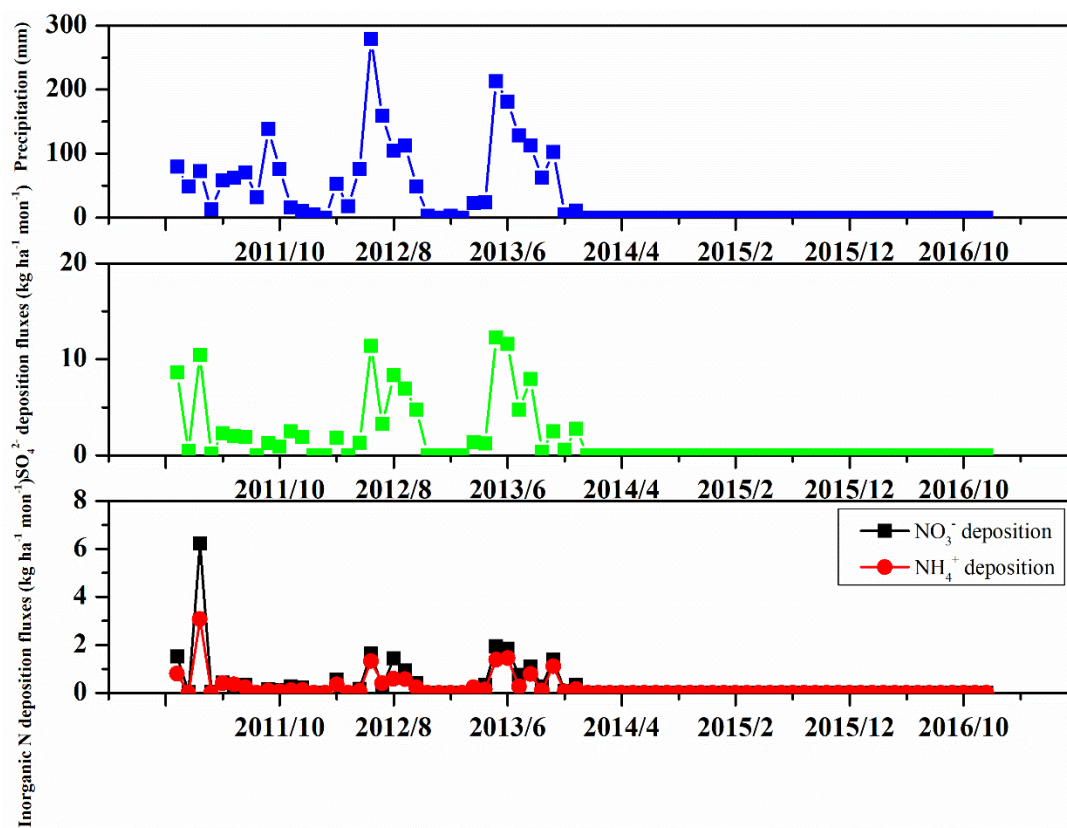

Fig. S159 The precipitation and wet deposition fluxes of secondary ions in Sanming

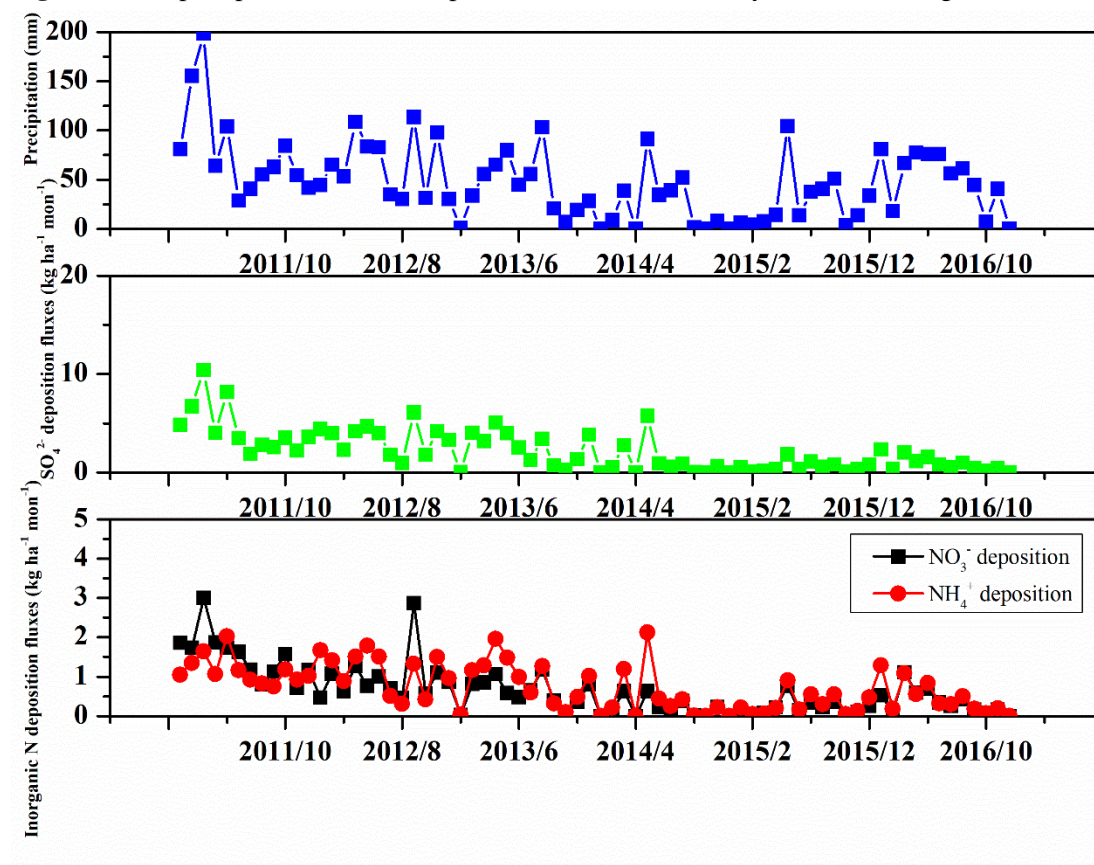

**Fig. S160** The precipitation and wet deposition fluxes of secondary ions in Yichun

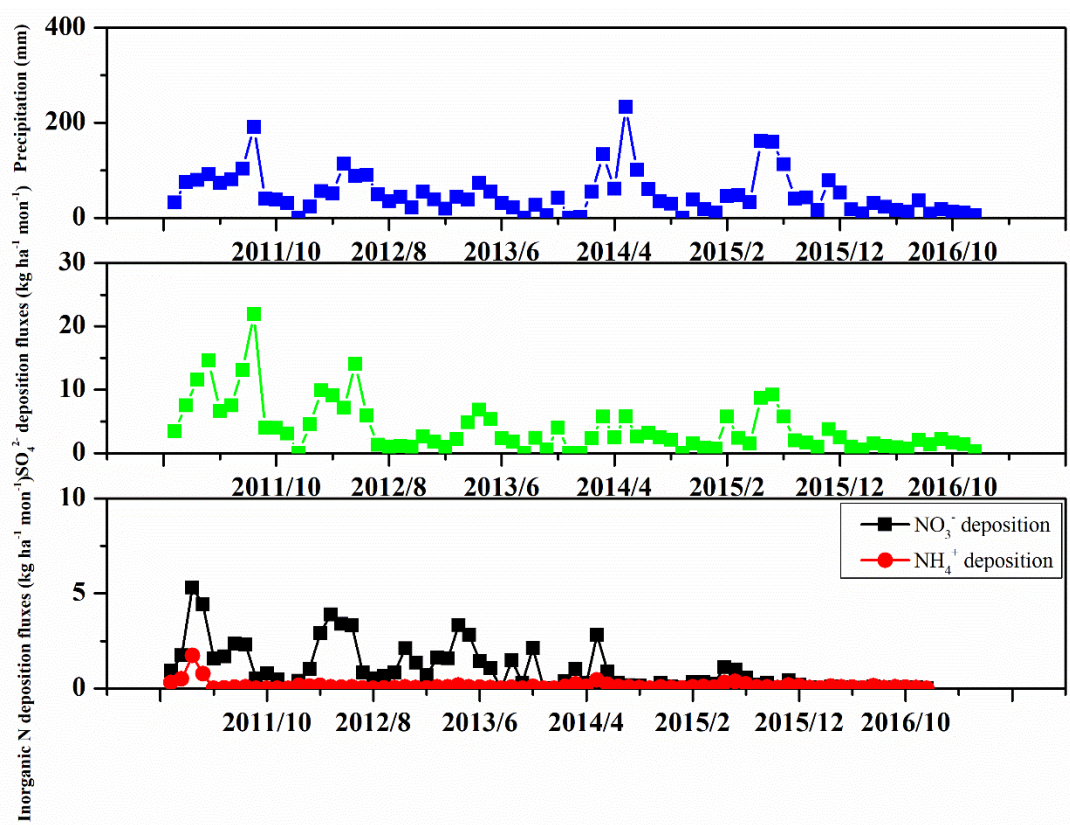

**Fig. S161** The precipitation and wet deposition fluxes of secondary ions in Xiamen

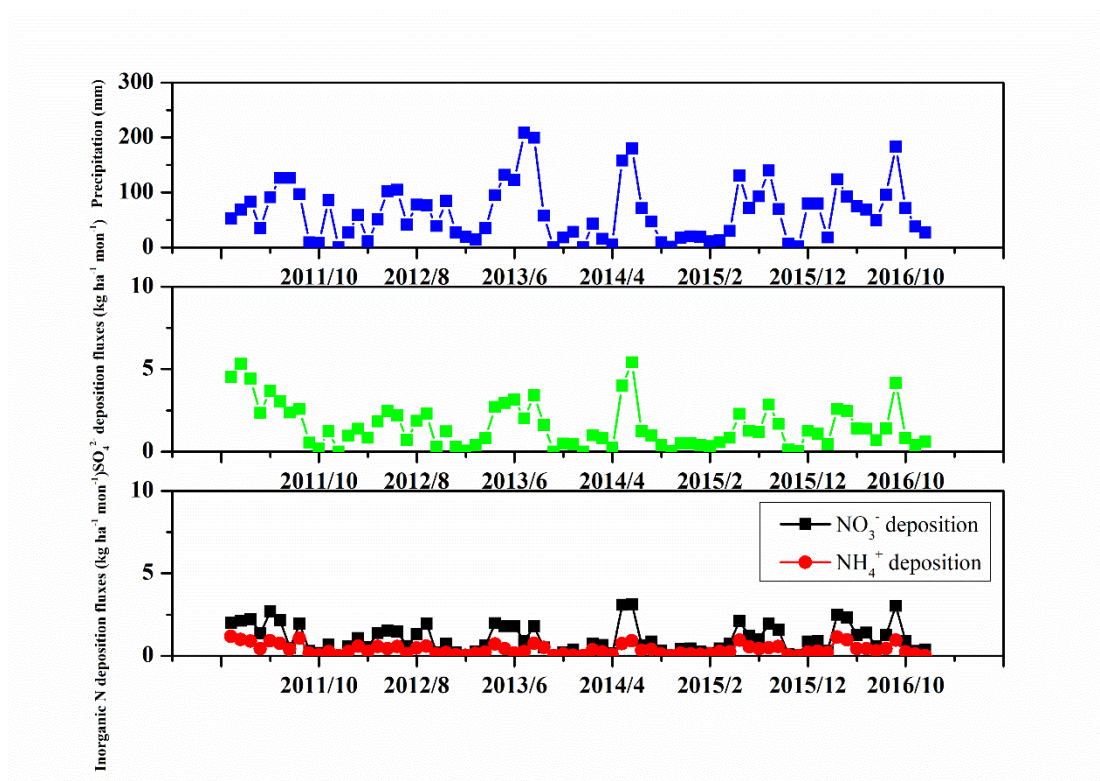

**Fig. S162** The precipitation and wet deposition fluxes of secondary ions in Shenyang

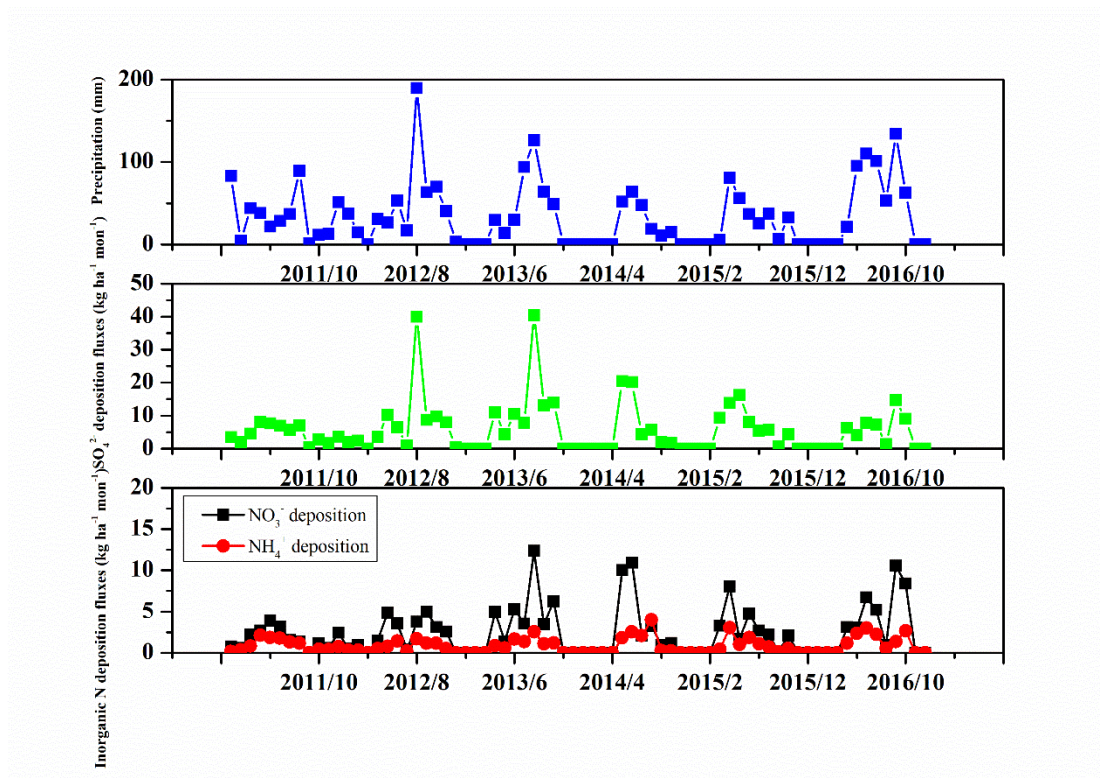

**Fig. S163** The precipitation and wet deposition fluxes of secondary ions in Deyang

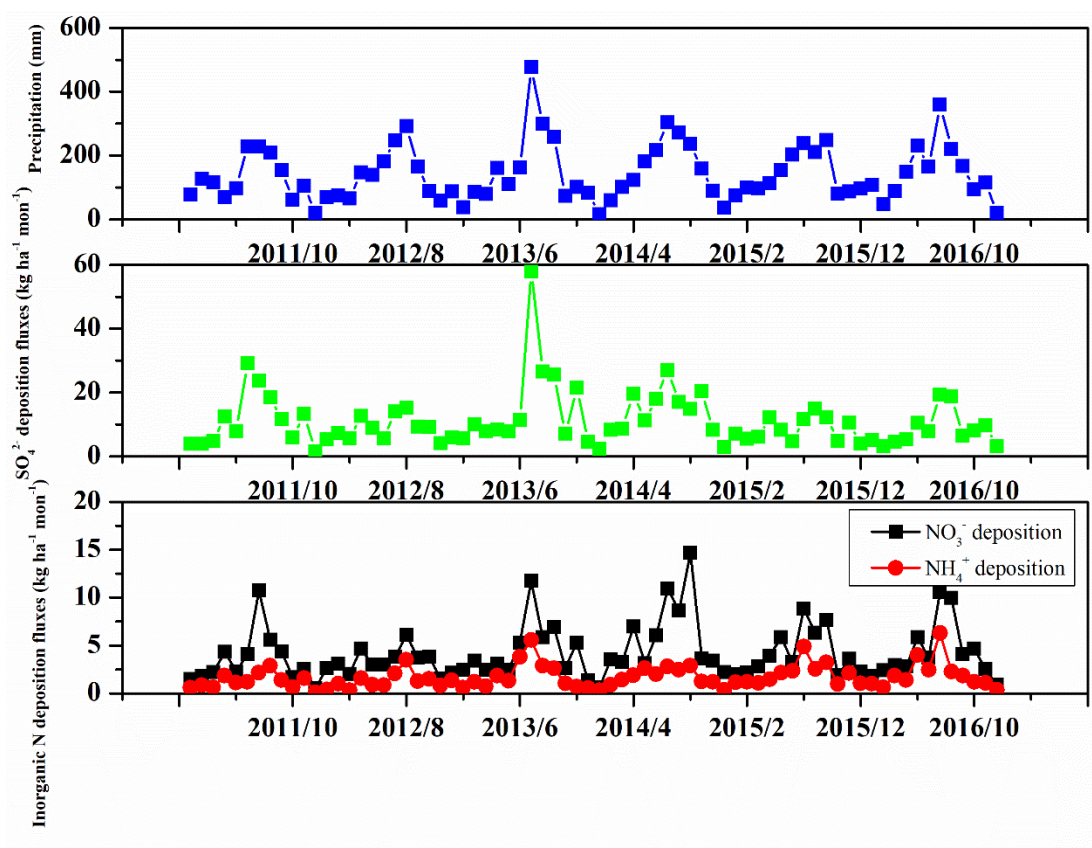

**Fig. S164** The precipitation and wet deposition fluxes of secondary ions in Jinan

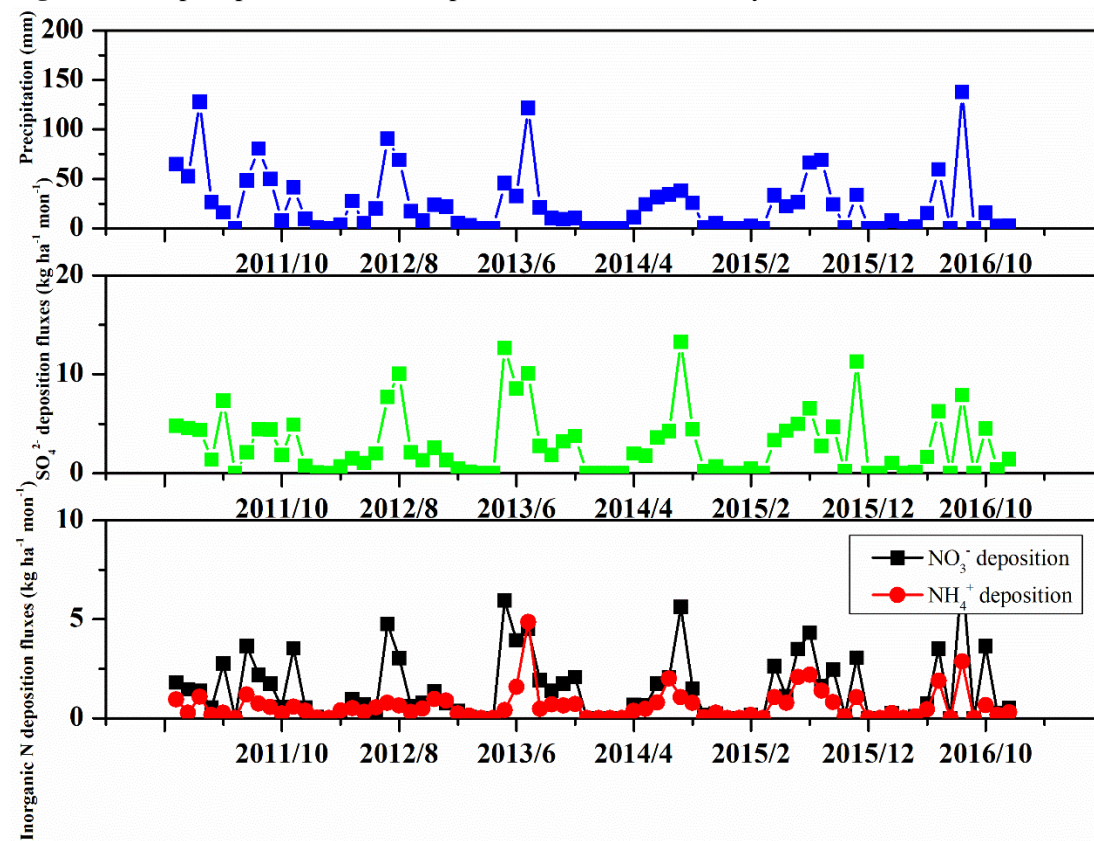

Fig. S165 The precipitation and wet deposition fluxes of secondary ions in Zhoukou

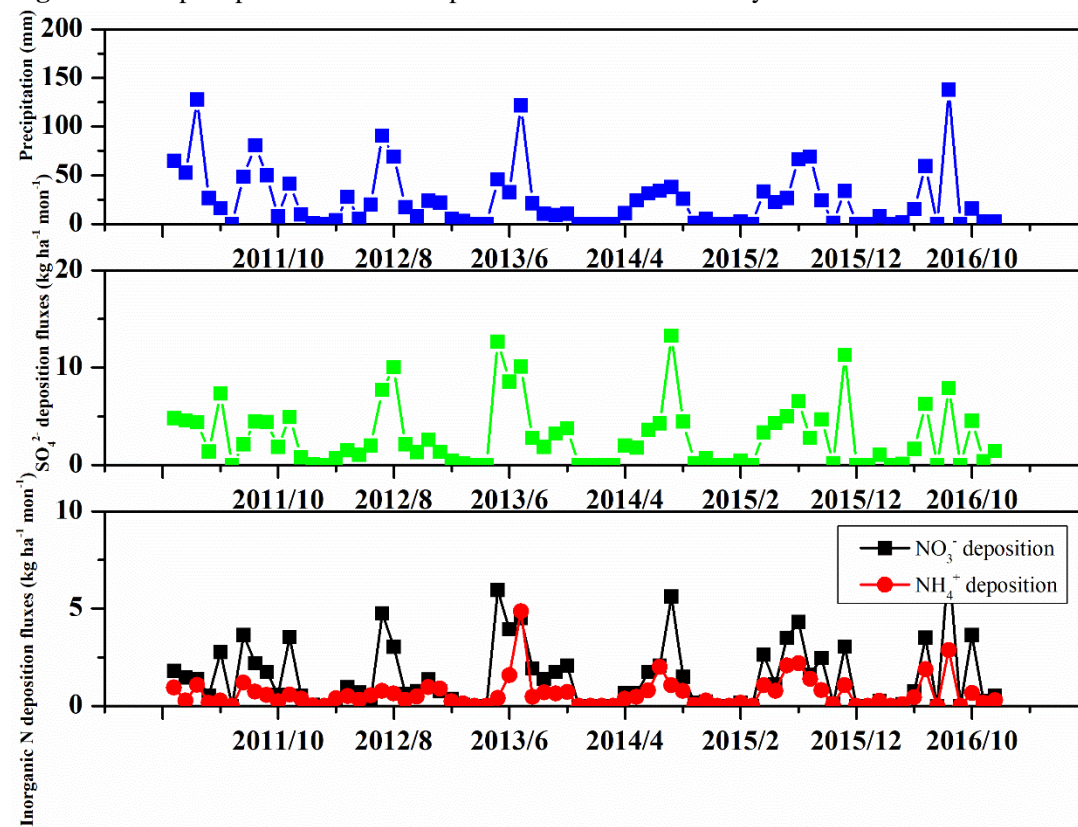



Fig. S166 The precipitation and wet deposition fluxes of secondary ions in Zaozhuang

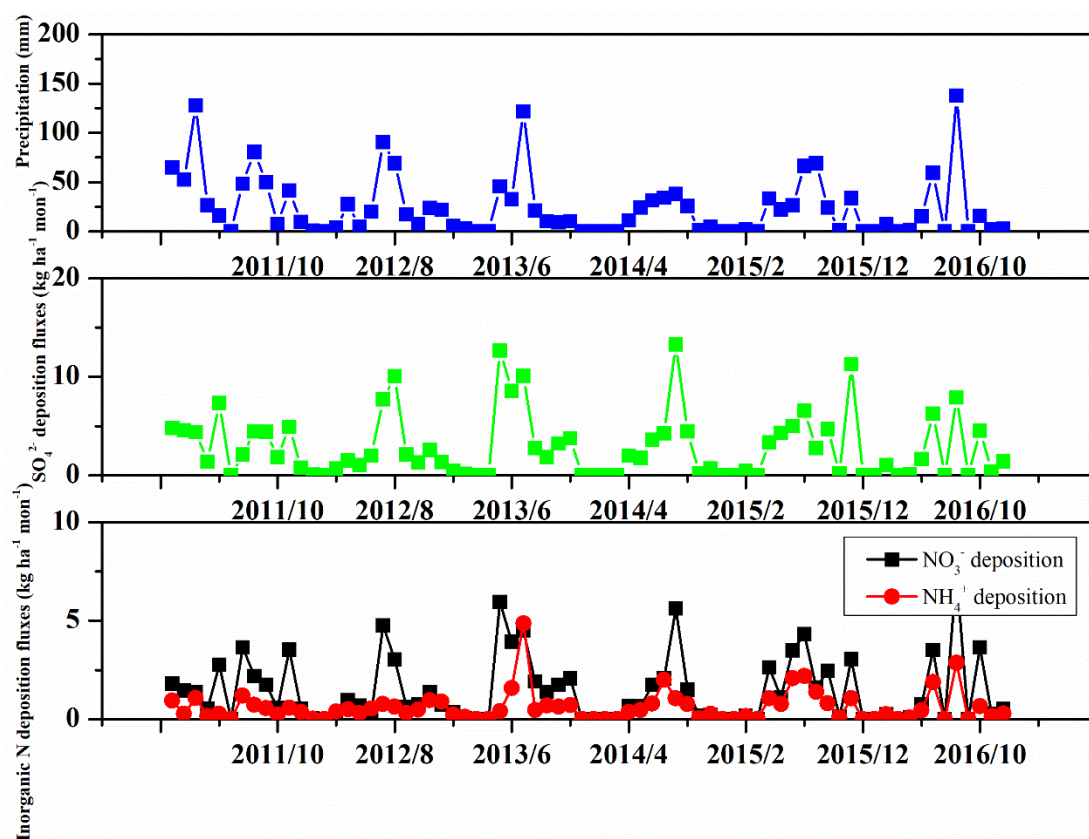

Supplement: Supplementary file 1 [file acp-2019-52-supplement.pdf]
